# Supplementary material for: Resolving the origin of the multimode Jahn–Teller effect in metallophthalocyanines
Source: Royal Society of Chemistry journal article supplement (doi:10.1039/c6cp03859j), 2016-01-01
Supplement: c6cp03859j1.pdf [file c6cp03859j1.pdf]

**Supplementary Information for**

**Resolving origin of the multimode Jahn-Teller effect in  
metallophthalocyanines**

Ljubica Andjelković<sup>a</sup>, Stepan Stepanović<sup>a</sup>, Filip Vlahović<sup>b</sup>, Matija Zlataar<sup>a</sup>, Maja Gruden<sup>c,\*</sup>

<sup>a</sup>*Department of Chemistry, IChTM, University of Belgrade, Studentski Trg 12-16, 11001 Belgrade, Republic of Serbia*

<sup>b</sup>*Innovation center of the Faculty of Chemistry, University of Belgrade, Studentski Trg 12-16, 11001 Belgrade, Republic of Serbia*

<sup>c</sup>*Center for Computational Chemistry and Bioinformatics, Faculty of Chemistry, University of Belgrade, Studentski Trg 12-16, 11001 Belgrade, Republic of Serbia*

**Table S1.** EDA analysis for MnPc in HS and LS point groups using different density functional approximations; energies are given in cm<sup>-1</sup>.

**p. S2**

**Table S2.** EDA analysis for MgPc in HS and LS point groups using different density functional approximations; energies are given in cm<sup>-1</sup>.

**p. S3**

Cartesian coordinates and electronic occupations for all spin states of MnPc obtained by all performed DFAs.

**p. S3-S29**

Cartesian coordinates for Pc<sup>3-</sup>, MgPc<sup>-</sup> and MnPc in HS and LS minimum structures obtained by LDA.

**p. S30-S35**

**Table S1** EDA analysis for MnPc in HS and LS point groups using different density functional approximations; energies are given in cm<sup>-1</sup>.

|                                       | LDA                    |                        | OPBE                   |                        | OPBE/LDA*              |                        |
|---------------------------------------|------------------------|------------------------|------------------------|------------------------|------------------------|------------------------|
|                                       | <i>D</i> <sub>4h</sub> | <i>D</i> <sub>2h</sub> | <i>D</i> <sub>4h</sub> | <i>D</i> <sub>2h</sub> | <i>D</i> <sub>4h</sub> | <i>D</i> <sub>2h</sub> |
| E <sub>prep</sub> (Mn <sup>2+</sup> ) | 35369                  | 35369                  | 38820                  | 38820                  | 38820                  | 38820                  |
| E <sub>prep</sub> (Pc <sup>2-</sup> ) | 3830                   | 4005                   | 3846                   | 3950                   | 5043                   | 5224                   |
| E <sub>int</sub>                      | -286926                | -287239                | -263128                | -263410                | -264268                | -264618                |
| E <sub>Pauli</sub>                    | 91115                  | 91270                  | 89844                  | 89883                  | 97513                  | 97657                  |
| E <sub>elstat</sub>                   | -218983                | -219139                | -203610                | -203670                | -207748                | -207892                |
| Total steric                          | -127869                | -127870                | -113765                | -113787                | -110234                | -110234                |
| <i>A</i> <sub>g</sub>                 | -74362                 | -74493                 | -71795                 | -71994                 | -73470                 | -73632                 |
| <i>B</i> <sub>1g</sub>                | -11498                 | -11554                 | -9726                  | -9758                  | -10423                 | -10470                 |
| <i>B</i> <sub>2g</sub>                | -6249                  | -6361                  | -3752                  | -3975                  | -4463                  | -4599                  |
| <i>B</i> <sub>3g</sub>                | -18470                 | -18400                 | -16516                 | -16243                 | -17185                 | -17094                 |
| <i>A</i> <sub>u</sub>                 | -4027                  | -4023                  | -3978                  | -3981                  | -4011                  | -4009                  |
| <i>B</i> <sub>1u</sub>                | -19911                 | -19956                 | -19165                 | -19190                 | -19778                 | -19828                 |
| <i>B</i> <sub>2u</sub>                | -12623                 | -12649                 | -12482                 | -12514                 | -12628                 | -12652                 |
| <i>B</i> <sub>3u</sub>                | -11915                 | -11931                 | -11948                 | -11968                 | -12075                 | -12099                 |
| ΔE <sub>orbint</sub>                  | -159057                | -159368                | -149363                | -149623                | -154033                | -154384                |

\*OPBE single point on LDA geometries

**Table S2** EDA analysis for MgPc in HS and LS point groups using different density functional approximations; energies are given in cm<sup>-1</sup>.

|                                       | LDA                    |                        | OPBE                   |                        | OPBE/LDA*              |                        |
|---------------------------------------|------------------------|------------------------|------------------------|------------------------|------------------------|------------------------|
|                                       | <i>D</i> <sub>4h</sub> | <i>D</i> <sub>2h</sub> | <i>D</i> <sub>4h</sub> | <i>D</i> <sub>2h</sub> | <i>D</i> <sub>4h</sub> | <i>D</i> <sub>2h</sub> |
| E <sub>prep</sub> (Pc <sup>3-</sup> ) | 2408                   | 2112                   | 2251                   | 1969                   | 2307                   | 2007                   |
| E <sub>int</sub>                      | -278703                | -278807                | -268217                | -268357                | -268730                | -268839                |
| E <sub>Pauli</sub>                    | 36502                  | 36576                  | 35057                  | 35049                  | 37866                  | 37945                  |
| E <sub>elstat</sub>                   | -227656                | -227839                | -218998                | -219163                | -221235                | -221425                |
| Total steric                          | -191154                | -191263                | -183941                | -184114                | -183368                | -183480                |
| <i>A</i> <sub>g</sub>                 | -19733                 | -19778                 | -19065                 | -19104                 | -19062                 | -19108                 |
| <i>B</i> <sub>1g</sub>                | -4751                  | -4765                  | -4706                  | -4718                  | -4830                  | -4845                  |
| <i>B</i> <sub>2g</sub>                | -11931                 | -11931                 | -11292                 | -11281                 | -11541                 | -11536                 |
| <i>B</i> <sub>3g</sub>                | -10135                 | -9952                  | -9787                  | -9607                  | -10042                 | -9861                  |
| <i>A</i> <sub>u</sub>                 | -3738                  | -3751                  | -3714                  | -3723                  | -3726                  | -3738                  |
| <i>B</i> <sub>1u</sub>                | -15335                 | -15388                 | -14521                 | -14572                 | -14875                 | -14930                 |
| <i>B</i> <sub>2u</sub>                | -10897                 | -10914                 | -10522                 | -10530                 | -10568                 | -10580                 |
| <i>B</i> <sub>3u</sub>                | -11029                 | -11064                 | -10670                 | -10708                 | -10718                 | -10759                 |
| ΔE <sub>orbint</sub>                  | -87549                 | -87544                 | -84277                 | -84243                 | -85363                 | -85358                 |

\*OPBE single point on LDA geometries

**Cartesian coordinates and electronic occupations for all spin states of MnPc obtained by all performed DFAs.**

level of theory bp86  
spin state HS

| Occup.          | alpha       | beta        |            |
|-----------------|-------------|-------------|------------|
| A <sub>1g</sub> | 21.0 //     | 20.0        |            |
| A <sub>2g</sub> | 11.0 //     | 11.0        |            |
| B <sub>1g</sub> | 16.0 //     | 15.0        |            |
| B <sub>2g</sub> | 14.0 //     | 13.0        |            |
| E <sub>1g</sub> | 12.0 //     | 10.0        |            |
| A <sub>1u</sub> | 2.0 //      | 2.0         |            |
| A <sub>2u</sub> | 6.0 //      | 6.0         |            |
| B <sub>1u</sub> | 2.0 //      | 2.0         |            |
| B <sub>2u</sub> | 3.0 //      | 3.0         |            |
| E <sub>1u</sub> | 60.0 //     | 60.0        |            |
| Mn              | 0.00000000  | 0.00000000  | 0.00000000 |
| N               | 2.40279915  | 2.40279915  | 0.00000000 |
| N               | -2.40279915 | 2.40279915  | 0.00000000 |
| N               | -2.40279915 | -2.40279915 | 0.00000000 |
| N               | 2.40279915  | -2.40279915 | 0.00000000 |
| N               | 0.00000000  | 2.02952598  | 0.00000000 |
| C               | 1.13176726  | 2.81196693  | 0.00000000 |
| C               | 0.70834608  | 4.21068983  | 0.00000000 |
| C               | -0.70834608 | 4.21068983  | 0.00000000 |
| C               | -1.13176726 | 2.81196693  | 0.00000000 |
| N               | -2.02952598 | 0.00000000  | 0.00000000 |
| C               | -2.81196693 | 1.13176726  | 0.00000000 |
| C               | -4.21068983 | 0.70834608  | 0.00000000 |
| C               | -4.21068983 | -0.70834608 | 0.00000000 |
| C               | -2.81196693 | -1.13176726 | 0.00000000 |
| N               | 0.00000000  | -2.02952598 | 0.00000000 |
| C               | -1.13176726 | -2.81196693 | 0.00000000 |
| C               | -0.70834608 | -4.21068983 | 0.00000000 |
| C               | 0.70834608  | -4.21068983 | 0.00000000 |
| C               | 1.13176726  | -2.81196693 | 0.00000000 |
| N               | 2.02952598  | 0.00000000  | 0.00000000 |
| C               | 2.81196693  | -1.13176726 | 0.00000000 |
| C               | 4.21068983  | -0.70834608 | 0.00000000 |
| C               | 4.21068983  | 0.70834608  | 0.00000000 |
| C               | 2.81196693  | 1.13176726  | 0.00000000 |
| C               | -5.40686430 | -1.42505052 | 0.00000000 |
| C               | -6.60197884 | -0.70362423 | 0.00000000 |
| C               | -6.60197884 | 0.70362423  | 0.00000000 |
| C               | -5.40686430 | 1.42505052  | 0.00000000 |
| C               | -1.42505052 | 5.40686430  | 0.00000000 |
| C               | -0.70362423 | 6.60197884  | 0.00000000 |
| C               | 0.70362423  | 6.60197884  | 0.00000000 |
| C               | 1.42505052  | 5.40686430  | 0.00000000 |
| C               | 5.40686430  | 1.42505052  | 0.00000000 |
| C               | 6.60197884  | 0.70362423  | 0.00000000 |

|   |             |             |            |
|---|-------------|-------------|------------|
| C | 6.60197884  | -0.70362423 | 0.00000000 |
| C | 5.40686430  | -1.42505052 | 0.00000000 |
| C | 1.42505052  | -5.40686430 | 0.00000000 |
| C | 0.70362423  | -6.60197884 | 0.00000000 |
| C | -0.70362423 | -6.60197884 | 0.00000000 |
| C | -1.42505052 | -5.40686430 | 0.00000000 |
| H | -5.39810748 | -2.51324161 | 0.00000000 |
| H | -7.55227746 | -1.23589823 | 0.00000000 |
| H | -7.55227746 | 1.23589823  | 0.00000000 |
| H | -5.39810748 | 2.51324161  | 0.00000000 |
| H | -2.51324161 | 5.39810748  | 0.00000000 |
| H | -1.23589823 | 7.55227746  | 0.00000000 |
| H | 1.23589823  | 7.55227746  | 0.00000000 |
| H | 2.51324161  | 5.39810748  | 0.00000000 |
| H | 5.39810748  | 2.51324161  | 0.00000000 |
| H | 7.55227746  | 1.23589823  | 0.00000000 |
| H | 7.55227746  | -1.23589823 | 0.00000000 |
| H | 5.39810748  | -2.51324161 | 0.00000000 |
| H | 2.51324161  | -5.39810748 | 0.00000000 |
| H | 1.23589823  | -7.55227746 | 0.00000000 |
| H | -1.23589823 | -7.55227746 | 0.00000000 |
| H | -2.51324161 | -5.39810748 | 0.00000000 |

level of theory bp86  
spin state IS

| Occup.          | alpha       | beta        |            |
|-----------------|-------------|-------------|------------|
| A <sub>1g</sub> | 21.0 //     | 20.0        |            |
| A <sub>2g</sub> | 11.0 //     | 11.0        |            |
| B <sub>1g</sub> | 15.0 //     | 15.0        |            |
| B <sub>2g</sub> | 14.0 //     | 13.0        |            |
| E <sub>1g</sub> | 12.0 //     | 11.0        |            |
| A <sub>1u</sub> | 2.0 //      | 2.0         |            |
| A <sub>2u</sub> | 6.0 //      | 6.0         |            |
| B <sub>1u</sub> | 2.0 //      | 2.0         |            |
| B <sub>2u</sub> | 3.0 //      | 3.0         |            |
| E <sub>1u</sub> | 60.0 //     | 60.0        |            |
| Mn              | 0.00000000  | 0.00000000  | 0.00000000 |
| N               | 2.39266329  | 2.39266329  | 0.00000000 |
| N               | -2.39266329 | 2.39266329  | 0.00000000 |
| N               | -2.39266329 | -2.39266329 | 0.00000000 |
| N               | 2.39266329  | -2.39266329 | 0.00000000 |
| N               | 0.00000000  | 1.94821420  | 0.00000000 |
| C               | 1.12597065  | 2.76852572  | 0.00000000 |
| C               | 0.70440636  | 4.15443193  | 0.00000000 |
| C               | -0.70440636 | 4.15443193  | 0.00000000 |
| C               | -1.12597065 | 2.76852572  | 0.00000000 |
| N               | -1.94821420 | 0.00000000  | 0.00000000 |
| C               | -2.76852572 | 1.12597065  | 0.00000000 |
| C               | -4.15443193 | 0.70440636  | 0.00000000 |
| C               | -4.15443193 | -0.70440636 | 0.00000000 |
| C               | -2.76852572 | -1.12597065 | 0.00000000 |
| N               | 0.00000000  | -1.94821420 | 0.00000000 |



|   |             |             |            |
|---|-------------|-------------|------------|
| H | 5.34404567  | -2.51443385 | 0.00000000 |
| H | 2.51443385  | -5.34404567 | 0.00000000 |
| H | 1.23539498  | -7.50048318 | 0.00000000 |
| H | -1.23539498 | -7.50048318 | 0.00000000 |
| H | -2.51443385 | -5.34404567 | 0.00000000 |

level of theory bp86  
spin state IS3

| Occup.          | alpha |    | beta |
|-----------------|-------|----|------|
| A <sub>1g</sub> | 21.0  | // | 21.0 |
| A <sub>2g</sub> | 11.0  | // | 11.0 |
| B <sub>1g</sub> | 15.0  | // | 15.0 |
| B <sub>2g</sub> | 14.0  | // | 13.0 |
| E <sub>1g</sub> | 12.0  | // | 10.0 |
| A <sub>1u</sub> | 2.0   | // | 2.0  |
| A <sub>2u</sub> | 6.0   | // | 6.0  |
| B <sub>1u</sub> | 2.0   | // | 2.0  |
| B <sub>2u</sub> | 3.0   | // | 3.0  |
| E <sub>1u</sub> | 60.0  | // | 60.0 |

|    |             |             |            |
|----|-------------|-------------|------------|
| Mn | 0.00000000  | 0.00000000  | 0.00000000 |
| N  | 2.39077889  | 2.39077889  | 0.00000000 |
| N  | -2.39077889 | 2.39077889  | 0.00000000 |
| N  | -2.39077889 | -2.39077889 | 0.00000000 |
| N  | 2.39077889  | -2.39077889 | 0.00000000 |
| N  | 0.00000000  | 1.95515965  | 0.00000000 |
| C  | 1.12185100  | 2.76711175  | 0.00000000 |
| C  | 0.70414547  | 4.15823301  | 0.00000000 |
| C  | -0.70414547 | 4.15823301  | 0.00000000 |
| C  | -1.12185100 | 2.76711175  | 0.00000000 |
| N  | -1.95515965 | 0.00000000  | 0.00000000 |
| C  | -2.76711175 | 1.12185100  | 0.00000000 |
| C  | -4.15823301 | 0.70414547  | 0.00000000 |
| C  | -4.15823301 | -0.70414547 | 0.00000000 |
| C  | -2.76711175 | -1.12185100 | 0.00000000 |
| N  | 0.00000000  | -1.95515965 | 0.00000000 |
| C  | -1.12185100 | -2.76711175 | 0.00000000 |
| C  | -0.70414547 | -4.15823301 | 0.00000000 |
| C  | 0.70414547  | -4.15823301 | 0.00000000 |
| C  | 1.12185100  | -2.76711175 | 0.00000000 |
| N  | 1.95515965  | 0.00000000  | 0.00000000 |
| C  | 2.76711175  | -1.12185100 | 0.00000000 |
| C  | 4.15823301  | -0.70414547 | 0.00000000 |
| C  | 4.15823301  | 0.70414547  | 0.00000000 |
| C  | 2.76711175  | 1.12185100  | 0.00000000 |
| C  | -5.35215108 | -1.42662641 | 0.00000000 |
| C  | -6.54546165 | -0.70448044 | 0.00000000 |
| C  | -6.54546165 | 0.70448044  | 0.00000000 |
| C  | -5.35215108 | 1.42662641  | 0.00000000 |
| C  | -1.42662641 | 5.35215108  | 0.00000000 |
| C  | -0.70448044 | 6.54546165  | 0.00000000 |
| C  | 0.70448044  | 6.54546165  | 0.00000000 |
| C  | 1.42662641  | 5.35215108  | 0.00000000 |

|   |             |             |            |
|---|-------------|-------------|------------|
| C | 5.35215108  | 1.42662641  | 0.00000000 |
| C | 6.54546165  | 0.70448044  | 0.00000000 |
| C | 6.54546165  | -0.70448044 | 0.00000000 |
| C | 5.35215108  | -1.42662641 | 0.00000000 |
| C | 1.42662641  | -5.35215108 | 0.00000000 |
| C | 0.70448044  | -6.54546165 | 0.00000000 |
| C | -0.70448044 | -6.54546165 | 0.00000000 |
| C | -1.42662641 | -5.35215108 | 0.00000000 |
| H | -5.34176703 | -2.51455927 | 0.00000000 |
| H | -7.49619737 | -1.23577440 | 0.00000000 |
| H | -7.49619737 | 1.23577440  | 0.00000000 |
| H | -5.34176703 | 2.51455927  | 0.00000000 |
| H | -2.51455927 | 5.34176703  | 0.00000000 |
| H | -1.23577440 | 7.49619737  | 0.00000000 |
| H | 1.23577440  | 7.49619737  | 0.00000000 |
| H | 2.51455927  | 5.34176703  | 0.00000000 |
| H | 5.34176703  | 2.51455927  | 0.00000000 |
| H | 7.49619737  | 1.23577440  | 0.00000000 |
| H | 7.49619737  | -1.23577440 | 0.00000000 |
| H | 5.34176703  | -2.51455927 | 0.00000000 |
| H | 2.51455927  | -5.34176703 | 0.00000000 |
| H | 1.23577440  | -7.49619737 | 0.00000000 |
| H | -1.23577440 | -7.49619737 | 0.00000000 |
| H | -2.51455927 | -5.34176703 | 0.00000000 |

level of theory bp86  
spin state LS

| Occup.          | alpha |    | beta |
|-----------------|-------|----|------|
| A <sub>1g</sub> | 20.0  | // | 21.0 |
| A <sub>2g</sub> | 11.0  | // | 11.0 |
| B <sub>1g</sub> | 15.0  | // | 15.0 |
| B <sub>2g</sub> | 14.0  | // | 13.0 |
| E <sub>1g</sub> | 12.0  | // | 11.0 |
| A <sub>1u</sub> | 2.0   | // | 2.0  |
| A <sub>2u</sub> | 6.0   | // | 6.0  |
| B <sub>1u</sub> | 2.0   | // | 2.0  |
| B <sub>2u</sub> | 3.0   | // | 3.0  |
| E <sub>1u</sub> | 60.0  | // | 60.0 |

|    |             |             |            |
|----|-------------|-------------|------------|
| Mn | 0.00000000  | 0.00000000  | 0.00000000 |
| N  | 2.38936387  | 2.38936387  | 0.00000000 |
| N  | -2.38936387 | 2.38936387  | 0.00000000 |
| N  | -2.38936387 | -2.38936387 | 0.00000000 |
| N  | 2.38936387  | -2.38936387 | 0.00000000 |
| N  | 0.00000000  | 1.94217046  | 0.00000000 |
| C  | 1.12377721  | 2.76540780  | 0.00000000 |
| C  | 0.70389623  | 4.15217975  | 0.00000000 |
| C  | -0.70389623 | 4.15217975  | 0.00000000 |
| C  | -1.12377721 | 2.76540780  | 0.00000000 |
| N  | -1.94217046 | 0.00000000  | 0.00000000 |
| C  | -2.76540780 | 1.12377721  | 0.00000000 |
| C  | -4.15217975 | 0.70389623  | 0.00000000 |
| C  | -4.15217975 | -0.70389623 | 0.00000000 |

|   |             |             |            |
|---|-------------|-------------|------------|
| C | -2.76540780 | -1.12377721 | 0.00000000 |
| N | 0.00000000  | -1.94217046 | 0.00000000 |
| C | -1.12377721 | -2.76540780 | 0.00000000 |
| C | -0.70389623 | -4.15217975 | 0.00000000 |
| C | 0.70389623  | -4.15217975 | 0.00000000 |
| C | 1.12377721  | -2.76540780 | 0.00000000 |
| N | 1.94217046  | 0.00000000  | 0.00000000 |
| C | 2.76540780  | -1.12377721 | 0.00000000 |
| C | 4.15217975  | -0.70389623 | 0.00000000 |
| C | 4.15217975  | 0.70389623  | 0.00000000 |
| C | 2.76540780  | 1.12377721  | 0.00000000 |
| C | -5.34702335 | -1.42637558 | 0.00000000 |
| C | -6.54012860 | -0.70467571 | 0.00000000 |
| C | -6.54012860 | 0.70467571  | 0.00000000 |
| C | -5.34702335 | 1.42637558  | 0.00000000 |
| C | -1.42637558 | 5.34702335  | 0.00000000 |
| C | -0.70467571 | 6.54012860  | 0.00000000 |
| C | 0.70467571  | 6.54012860  | 0.00000000 |
| C | 1.42637558  | 5.34702335  | 0.00000000 |
| C | 5.34702335  | 1.42637558  | 0.00000000 |
| C | 6.54012860  | 0.70467571  | 0.00000000 |
| C | 6.54012860  | -0.70467571 | 0.00000000 |
| C | 5.34702335  | -1.42637558 | 0.00000000 |
| C | 1.42637558  | -5.34702335 | 0.00000000 |
| C | 0.70467571  | -6.54012860 | 0.00000000 |
| C | -0.70467571 | -6.54012860 | 0.00000000 |
| C | -1.42637558 | -5.34702335 | 0.00000000 |
| H | -5.33566033 | -2.51431584 | 0.00000000 |
| H | -7.49068334 | -1.23627130 | 0.00000000 |
| H | -7.49068334 | 1.23627130  | 0.00000000 |
| H | -5.33566033 | 2.51431584  | 0.00000000 |
| H | -2.51431584 | 5.33566033  | 0.00000000 |
| H | -1.23627130 | 7.49068334  | 0.00000000 |
| H | 1.23627130  | 7.49068334  | 0.00000000 |
| H | 2.51431584  | 5.33566033  | 0.00000000 |
| H | 5.33566033  | 2.51431584  | 0.00000000 |
| H | 7.49068334  | 1.23627130  | 0.00000000 |
| H | 7.49068334  | -1.23627130 | 0.00000000 |
| H | 5.33566033  | -2.51431584 | 0.00000000 |
| H | 2.51431584  | -5.33566033 | 0.00000000 |
| H | 1.23627130  | -7.49068334 | 0.00000000 |
| H | -1.23627130 | -7.49068334 | 0.00000000 |
| H | -2.51431584 | -5.33566033 | 0.00000000 |

level of theory opbe  
spin state HS

| Occup.          | alpha        | beta |
|-----------------|--------------|------|
| A <sub>1g</sub> | 21.0 // 20.0 |      |
| A <sub>2g</sub> | 11.0 // 11.0 |      |
| B <sub>1g</sub> | 16.0 // 15.0 |      |
| B <sub>2g</sub> | 14.0 // 13.0 |      |
| E <sub>1g</sub> | 12.0 // 10.0 |      |
| A <sub>1u</sub> | 2.0 // 2.0   |      |
| A <sub>2u</sub> | 6.0 // 6.0   |      |

|                 |              |
|-----------------|--------------|
| B <sub>1u</sub> | 2.0 // 2.0   |
| B <sub>2u</sub> | 3.0 // 3.0   |
| E <sub>1u</sub> | 60.0 // 60.0 |

|    |             |             |            |
|----|-------------|-------------|------------|
| Mn | 0.00000000  | 0.00000000  | 0.00000000 |
| N  | 2.38860000  | 2.38860000  | 0.00000000 |
| N  | -2.38860000 | 2.38860000  | 0.00000000 |
| N  | -2.38860000 | -2.38860000 | 0.00000000 |
| N  | 2.38860000  | -2.38860000 | 0.00000000 |
| N  | 0.00000000  | 2.02570000  | 0.00000000 |
| C  | 1.12340000  | 2.79840000  | 0.00000000 |
| C  | 0.70480000  | 4.19490000  | 0.00000000 |
| C  | -0.70480000 | 4.19490000  | 0.00000000 |
| C  | -1.12340000 | 2.79840000  | 0.00000000 |
| N  | -2.02570000 | 0.00000000  | 0.00000000 |
| C  | -2.79840000 | 1.12340000  | 0.00000000 |
| C  | -4.19490000 | 0.70480000  | 0.00000000 |
| C  | -4.19490000 | -0.70480000 | 0.00000000 |
| C  | -2.79840000 | -1.12340000 | 0.00000000 |
| N  | 0.00000000  | -2.02570000 | 0.00000000 |
| C  | -1.12340000 | -2.79840000 | 0.00000000 |
| C  | -0.70480000 | -4.19490000 | 0.00000000 |
| C  | 0.70480000  | -4.19490000 | 0.00000000 |
| C  | 1.12340000  | -2.79840000 | 0.00000000 |
| N  | 2.02570000  | 0.00000000  | 0.00000000 |
| C  | 2.79840000  | -1.12340000 | 0.00000000 |
| C  | 4.19490000  | -0.70480000 | 0.00000000 |
| C  | 4.19490000  | 0.70480000  | 0.00000000 |
| C  | 2.79840000  | 1.12340000  | 0.00000000 |
| C  | -5.38930000 | -1.41840000 | 0.00000000 |
| C  | -6.57910000 | -0.70030000 | 0.00000000 |
| C  | -6.57910000 | 0.70030000  | 0.00000000 |
| C  | -5.38930000 | 1.41840000  | 0.00000000 |
| C  | -1.41840000 | 5.38930000  | 0.00000000 |
| C  | -0.70030000 | 6.57910000  | 0.00000000 |
| C  | 0.70030000  | 6.57910000  | 0.00000000 |
| C  | 1.41840000  | 5.38930000  | 0.00000000 |
| C  | 5.38930000  | 1.41840000  | 0.00000000 |
| C  | 6.57910000  | 0.70030000  | 0.00000000 |
| C  | 6.57910000  | -0.70030000 | 0.00000000 |
| C  | 5.38930000  | -1.41840000 | 0.00000000 |
| C  | 1.41840000  | -5.38930000 | 0.00000000 |
| C  | 0.70030000  | -6.57910000 | 0.00000000 |
| C  | -0.70030000 | -6.57910000 | 0.00000000 |
| C  | -1.41840000 | -5.38930000 | 0.00000000 |
| H  | -5.38570000 | -2.50540000 | 0.00000000 |
| H  | -7.52870000 | -1.23230000 | 0.00000000 |
| H  | -7.52870000 | 1.23230000  | 0.00000000 |
| H  | -5.38570000 | 2.50540000  | 0.00000000 |
| H  | -2.50540000 | 5.38570000  | 0.00000000 |
| H  | -1.23230000 | 7.52870000  | 0.00000000 |
| H  | 1.23230000  | 7.52870000  | 0.00000000 |
| H  | 2.50540000  | 5.38570000  | 0.00000000 |
| H  | 5.38570000  | 2.50540000  | 0.00000000 |

|   |             |             |            |
|---|-------------|-------------|------------|
| H | 7.52870000  | 1.23230000  | 0.00000000 |
| H | 7.52870000  | -1.23230000 | 0.00000000 |
| H | 5.38570000  | -2.50540000 | 0.00000000 |
| H | 2.50540000  | -5.38570000 | 0.00000000 |
| H | 1.23230000  | -7.52870000 | 0.00000000 |
| H | -1.23230000 | -7.52870000 | 0.00000000 |
| H | -2.50540000 | -5.38570000 | 0.00000000 |

level of theory opbe  
spin state IS

| Occup.          | alpha |    | beta |
|-----------------|-------|----|------|
| A <sub>1g</sub> | 21.0  | // | 20.0 |
| A <sub>2g</sub> | 11.0  | // | 11.0 |
| B <sub>1g</sub> | 15.0  | // | 15.0 |
| B <sub>2g</sub> | 14.0  | // | 13.0 |
| E <sub>1g</sub> | 12.0  | // | 11.0 |
| A <sub>1u</sub> | 2.0   | // | 2.0  |
| A <sub>2u</sub> | 6.0   | // | 6.0  |
| B <sub>1u</sub> | 2.0   | // | 2.0  |
| B <sub>2u</sub> | 3.0   | // | 3.0  |
| E <sub>1u</sub> | 60.0  | // | 60.0 |

|    |             |             |            |
|----|-------------|-------------|------------|
| Mn | 0.00000000  | 0.00000000  | 0.00000000 |
| N  | 2.37830000  | 2.37830000  | 0.00000000 |
| N  | -2.37830000 | 2.37830000  | 0.00000000 |
| N  | -2.37830000 | -2.37830000 | 0.00000000 |
| N  | 2.37830000  | -2.37830000 | 0.00000000 |
| N  | 0.00000000  | 1.94090000  | 0.00000000 |
| C  | 1.11700000  | 2.75220000  | 0.00000000 |
| C  | 0.70080000  | 4.13490000  | 0.00000000 |
| C  | -0.70080000 | 4.13490000  | 0.00000000 |
| C  | -1.11700000 | 2.75220000  | 0.00000000 |
| N  | -1.94090000 | 0.00000000  | 0.00000000 |
| C  | -2.75220000 | 1.11700000  | 0.00000000 |
| C  | -4.13490000 | 0.70080000  | 0.00000000 |
| C  | -4.13490000 | -0.70080000 | 0.00000000 |
| C  | -2.75220000 | -1.11700000 | 0.00000000 |
| N  | 0.00000000  | -1.94090000 | 0.00000000 |
| C  | -1.11700000 | -2.75220000 | 0.00000000 |
| C  | -0.70080000 | -4.13490000 | 0.00000000 |
| C  | 0.70080000  | -4.13490000 | 0.00000000 |
| C  | 1.11700000  | -2.75220000 | 0.00000000 |
| N  | 1.94090000  | 0.00000000  | 0.00000000 |
| C  | 2.75220000  | -1.11700000 | 0.00000000 |
| C  | 4.13490000  | -0.70080000 | 0.00000000 |
| C  | 4.13490000  | 0.70080000  | 0.00000000 |
| C  | 2.75220000  | 1.11700000  | 0.00000000 |
| C  | -5.32850000 | -1.42040000 | 0.00000000 |
| C  | -6.51550000 | -0.70180000 | 0.00000000 |
| C  | -6.51550000 | 0.70180000  | 0.00000000 |
| C  | -5.32850000 | 1.42040000  | 0.00000000 |
| C  | -1.42040000 | 5.32850000  | 0.00000000 |
| C  | -0.70180000 | 6.51550000  | 0.00000000 |

|   |             |             |            |
|---|-------------|-------------|------------|
| C | 0.70180000  | 6.51550000  | 0.00000000 |
| C | 1.42040000  | 5.32850000  | 0.00000000 |
| C | 5.32850000  | 1.42040000  | 0.00000000 |
| C | 6.51550000  | 0.70180000  | 0.00000000 |
| C | 6.51550000  | -0.70180000 | 0.00000000 |
| C | 5.32850000  | -1.42040000 | 0.00000000 |
| C | 1.42040000  | -5.32850000 | 0.00000000 |
| C | 0.70180000  | -6.51550000 | 0.00000000 |
| C | -0.70180000 | -6.51550000 | 0.00000000 |
| C | -1.42040000 | -5.32850000 | 0.00000000 |
| H | -5.32390000 | -2.50700000 | 0.00000000 |
| H | -7.46550000 | -1.23290000 | 0.00000000 |
| H | -7.46550000 | 1.23290000  | 0.00000000 |
| H | -5.32390000 | 2.50700000  | 0.00000000 |
| H | -2.50700000 | 5.32390000  | 0.00000000 |
| H | -1.23290000 | 7.46550000  | 0.00000000 |
| H | 1.23290000  | 7.46550000  | 0.00000000 |
| H | 2.50700000  | 5.32390000  | 0.00000000 |
| H | 5.32390000  | 2.50700000  | 0.00000000 |
| H | 7.46550000  | 1.23290000  | 0.00000000 |
| H | 7.46550000  | -1.23290000 | 0.00000000 |
| H | 5.32390000  | -2.50700000 | 0.00000000 |
| H | 2.50700000  | -5.32390000 | 0.00000000 |
| H | 1.23290000  | -7.46550000 | 0.00000000 |
| H | -1.23290000 | -7.46550000 | 0.00000000 |
| H | -2.50700000 | -5.32390000 | 0.00000000 |

level of theory opbe  
spin state IS2

| Occup.          | alpha |    | beta |
|-----------------|-------|----|------|
| A <sub>1g</sub> | 21.0  | // | 20.0 |
| A <sub>2g</sub> | 11.0  | // | 11.0 |
| B <sub>1g</sub> | 15.0  | // | 15.0 |
| B <sub>2g</sub> | 14.0  | // | 14.0 |
| E <sub>1g</sub> | 12.0  | // | 10.0 |
| A <sub>1u</sub> | 2.0   | // | 2.0  |
| A <sub>2u</sub> | 6.0   | // | 6.0  |
| B <sub>1u</sub> | 2.0   | // | 2.0  |
| B <sub>2u</sub> | 3.0   | // | 3.0  |
| E <sub>1u</sub> | 60.0  | // | 60.0 |

|    |             |             |            |
|----|-------------|-------------|------------|
| Mn | 0.00000000  | 0.00000000  | 0.00000000 |
| N  | 2.37671336  | 2.37671336  | 0.00000000 |
| N  | -2.37671336 | 2.37671336  | 0.00000000 |
| N  | -2.37671336 | -2.37671336 | 0.00000000 |
| N  | 2.37671336  | -2.37671336 | 0.00000000 |
| N  | 0.00000000  | 1.94787870  | 0.00000000 |
| C  | 1.11119285  | 2.75231913  | 0.00000000 |
| C  | 0.70116250  | 4.14226932  | 0.00000000 |
| C  | -0.70116250 | 4.14226932  | 0.00000000 |
| C  | -1.11119285 | 2.75231913  | 0.00000000 |
| N  | -1.94787870 | 0.00000000  | 0.00000000 |
| C  | -2.75231913 | 1.11119285  | 0.00000000 |



|   |             |             |            |
|---|-------------|-------------|------------|
| C | -4.14226932 | 0.70116250  | 0.00000000 |
| C | -4.14226932 | -0.70116250 | 0.00000000 |
| C | -2.75231913 | -1.11119285 | 0.00000000 |
| N | 0.00000000  | -1.94787870 | 0.00000000 |
| C | -1.11119285 | -2.75231913 | 0.00000000 |
| C | -0.70116250 | -4.14226932 | 0.00000000 |
| C | 0.70116250  | -4.14226932 | 0.00000000 |
| C | 1.11119285  | -2.75231913 | 0.00000000 |
| N | 1.94787870  | 0.00000000  | 0.00000000 |
| C | 2.75231913  | -1.11119285 | 0.00000000 |
| C | 4.14226932  | -0.70116250 | 0.00000000 |
| C | 4.14226932  | 0.70116250  | 0.00000000 |
| C | 2.75231913  | 1.11119285  | 0.00000000 |
| C | -5.33486762 | -1.42002915 | 0.00000000 |
| C | -6.52279117 | -0.70125405 | 0.00000000 |
| C | -6.52279117 | 0.70125405  | 0.00000000 |
| C | -5.33486762 | 1.42002915  | 0.00000000 |
| C | -1.42002915 | 5.33486762  | 0.00000000 |
| C | -0.70125405 | 6.52279117  | 0.00000000 |
| C | 0.70125405  | 6.52279117  | 0.00000000 |
| C | 1.42002915  | 5.33486762  | 0.00000000 |
| C | 5.33486762  | 1.42002915  | 0.00000000 |
| C | 6.52279117  | 0.70125405  | 0.00000000 |
| C | 6.52279117  | -0.70125405 | 0.00000000 |
| C | 5.33486762  | -1.42002915 | 0.00000000 |
| C | 1.42002915  | -5.33486762 | 0.00000000 |
| C | 0.70125405  | -6.52279117 | 0.00000000 |
| C | -0.70125405 | -6.52279117 | 0.00000000 |
| C | -1.42002915 | -5.33486762 | 0.00000000 |
| H | -5.33037702 | -2.50674861 | 0.00000000 |
| H | -7.47304481 | -1.23201036 | 0.00000000 |
| H | -7.47304481 | 1.23201036  | 0.00000000 |
| H | -5.33037702 | 2.50674861  | 0.00000000 |
| H | -2.50674861 | 5.33037702  | 0.00000000 |
| H | -1.23201036 | 7.47304481  | 0.00000000 |
| H | 1.23201036  | 7.47304481  | 0.00000000 |
| H | 2.50674861  | 5.33037702  | 0.00000000 |
| H | 5.33037702  | 2.50674861  | 0.00000000 |
| H | 7.47304481  | 1.23201036  | 0.00000000 |
| H | 7.47304481  | -1.23201036 | 0.00000000 |
| H | 5.33037702  | -2.50674861 | 0.00000000 |
| H | 2.50674861  | -5.33037702 | 0.00000000 |
| H | 1.23201036  | -7.47304481 | 0.00000000 |
| H | -1.23201036 | -7.47304481 | 0.00000000 |
| H | -2.50674861 | -5.33037702 | 0.00000000 |

level of theory opbe  
spin state IS3

| Occup.          | alpha        | beta |
|-----------------|--------------|------|
| A <sub>1g</sub> | 21.0 // 21.0 |      |
| A <sub>2g</sub> | 11.0 // 11.0 |      |
| B <sub>1g</sub> | 15.0 // 15.0 |      |
| B <sub>2g</sub> | 14.0 // 13.0 |      |
| E <sub>1g</sub> | 12.0 // 10.0 |      |

|                 |              |
|-----------------|--------------|
| A <sub>1u</sub> | 2.0 // 2.0   |
| A <sub>2u</sub> | 6.0 // 6.0   |
| B <sub>1u</sub> | 2.0 // 2.0   |
| B <sub>2u</sub> | 3.0 // 3.0   |
| E <sub>1u</sub> | 60.0 // 60.0 |

|    |             |             |            |
|----|-------------|-------------|------------|
| Mn | 0.00000000  | 0.00000000  | 0.00000000 |
| N  | 2.37615296  | 2.37615296  | 0.00000000 |
| N  | -2.37615296 | 2.37615296  | 0.00000000 |
| N  | -2.37615296 | -2.37615296 | 0.00000000 |
| N  | 2.37615296  | -2.37615296 | 0.00000000 |
| N  | 0.00000000  | 1.94998006  | 0.00000000 |
| C  | 1.11249885  | 2.75195136  | 0.00000000 |
| C  | 0.70057300  | 4.14115382  | 0.00000000 |
| C  | -0.70057300 | 4.14115382  | 0.00000000 |
| C  | -1.11249885 | 2.75195136  | 0.00000000 |
| N  | -1.94998006 | 0.00000000  | 0.00000000 |
| C  | -2.75195136 | 1.11249885  | 0.00000000 |
| C  | -4.14115382 | 0.70057300  | 0.00000000 |
| C  | -4.14115382 | -0.70057300 | 0.00000000 |
| C  | -2.75195136 | -1.11249885 | 0.00000000 |
| N  | 0.00000000  | -1.94998006 | 0.00000000 |
| C  | -1.11249885 | -2.75195136 | 0.00000000 |
| C  | -0.70057300 | -4.14115382 | 0.00000000 |
| C  | 0.70057300  | -4.14115382 | 0.00000000 |
| C  | 1.11249885  | -2.75195136 | 0.00000000 |
| N  | 1.94998006  | 0.00000000  | 0.00000000 |
| C  | 2.75195136  | -1.11249885 | 0.00000000 |
| C  | 4.14115382  | -0.70057300 | 0.00000000 |
| C  | 4.14115382  | 0.70057300  | 0.00000000 |
| C  | 2.75195136  | 1.11249885  | 0.00000000 |
| C  | -5.33293983 | -1.42022918 | 0.00000000 |
| C  | -6.52079987 | -0.70114133 | 0.00000000 |
| C  | -6.52079987 | 0.70114133  | 0.00000000 |
| C  | -5.33293983 | 1.42022918  | 0.00000000 |
| C  | -1.42022918 | 5.33293983  | 0.00000000 |
| C  | -0.70114133 | 6.52079987  | 0.00000000 |
| C  | 0.70114133  | 6.52079987  | 0.00000000 |
| C  | 1.42022918  | 5.33293983  | 0.00000000 |
| C  | 5.33293983  | 1.42022918  | 0.00000000 |
| C  | 6.52079987  | 0.70114133  | 0.00000000 |
| C  | 6.52079987  | -0.70114133 | 0.00000000 |
| C  | 5.33293983  | -1.42022918 | 0.00000000 |
| C  | 1.42022918  | -5.33293983 | 0.00000000 |
| C  | 0.70114133  | -6.52079987 | 0.00000000 |
| C  | -0.70114133 | -6.52079987 | 0.00000000 |
| C  | -1.42022918 | -5.33293983 | 0.00000000 |
| H  | -5.32833281 | -2.50690260 | 0.00000000 |
| H  | -7.47086618 | -1.23209397 | 0.00000000 |
| H  | -7.47086618 | 1.23209397  | 0.00000000 |
| H  | -5.32833281 | 2.50690260  | 0.00000000 |
| H  | -2.50690260 | 5.32833281  | 0.00000000 |
| H  | -1.23209397 | 7.47086618  | 0.00000000 |
| H  | 1.23209397  | 7.47086618  | 0.00000000 |

|   |             |             |            |
|---|-------------|-------------|------------|
| H | 2.50690260  | 5.32833281  | 0.00000000 |
| H | 5.32833281  | 2.50690260  | 0.00000000 |
| H | 7.47086618  | 1.23209397  | 0.00000000 |
| H | 7.47086618  | -1.23209397 | 0.00000000 |
| H | 5.32833281  | -2.50690260 | 0.00000000 |
| H | 2.50690260  | -5.32833281 | 0.00000000 |
| H | 1.23209397  | -7.47086618 | 0.00000000 |
| H | -1.23209397 | -7.47086618 | 0.00000000 |
| H | -2.50690260 | -5.32833281 | 0.00000000 |

level of theory opbe  
spin state LS

| Occup.          | alpha   | beta |
|-----------------|---------|------|
| A <sub>1g</sub> | 21.0 // | 20.0 |
| A <sub>2g</sub> | 11.0 // | 11.0 |
| B <sub>1g</sub> | 15.0 // | 15.0 |
| B <sub>2g</sub> | 14.0 // | 13.0 |
| E <sub>1g</sub> | 12.0 // | 12.0 |
| A <sub>1u</sub> | 1.0 //  | 2.0  |
| A <sub>2u</sub> | 6.0 //  | 6.0  |
| B <sub>1u</sub> | 2.0 //  | 2.0  |
| B <sub>2u</sub> | 3.0 //  | 3.0  |
| E <sub>1u</sub> | 60.0 // | 60.0 |

|    |             |             |            |
|----|-------------|-------------|------------|
| Mn | 0.00000000  | 0.00000000  | 0.00000000 |
| N  | 2.38120000  | 2.38120000  | 0.00000000 |
| N  | -2.38120000 | 2.38120000  | 0.00000000 |
| N  | -2.38120000 | -2.38120000 | 0.00000000 |
| N  | 2.38120000  | -2.38120000 | 0.00000000 |
| N  | 0.00000000  | 1.93180000  | 0.00000000 |
| C  | 1.11680000  | 2.74840000  | 0.00000000 |
| C  | 0.69960000  | 4.13590000  | 0.00000000 |
| C  | -0.69960000 | 4.13590000  | 0.00000000 |
| C  | -1.11680000 | 2.74840000  | 0.00000000 |
| N  | -1.93180000 | 0.00000000  | 0.00000000 |
| C  | -2.74840000 | 1.11680000  | 0.00000000 |
| C  | -4.13590000 | 0.69960000  | 0.00000000 |
| C  | -4.13590000 | -0.69960000 | 0.00000000 |
| C  | -2.74840000 | -1.11680000 | 0.00000000 |
| N  | 0.00000000  | -1.93180000 | 0.00000000 |
| C  | -1.11680000 | -2.74840000 | 0.00000000 |
| C  | -0.69960000 | -4.13590000 | 0.00000000 |
| C  | 0.69960000  | -4.13590000 | 0.00000000 |
| C  | 1.11680000  | -2.74840000 | 0.00000000 |
| N  | 1.93180000  | 0.00000000  | 0.00000000 |
| C  | 2.74840000  | -1.11680000 | 0.00000000 |
| C  | 4.13590000  | -0.69960000 | 0.00000000 |
| C  | 4.13590000  | 0.69960000  | 0.00000000 |
| C  | 2.74840000  | 1.11680000  | 0.00000000 |
| C  | -5.32580000 | -1.41830000 | 0.00000000 |
| C  | -6.51860000 | -0.69940000 | 0.00000000 |
| C  | -6.51860000 | 0.69940000  | 0.00000000 |
| C  | -5.32580000 | 1.41830000  | 0.00000000 |

|   |             |             |            |
|---|-------------|-------------|------------|
| C | -1.41830000 | 5.32580000  | 0.00000000 |
| C | -0.69940000 | 6.51860000  | 0.00000000 |
| C | 0.69940000  | 6.51860000  | 0.00000000 |
| C | 1.41830000  | 5.32580000  | 0.00000000 |
| C | 5.32580000  | 1.41830000  | 0.00000000 |
| C | 6.51860000  | 0.69940000  | 0.00000000 |
| C | 6.51860000  | -0.69940000 | 0.00000000 |
| C | 5.32580000  | -1.41830000 | 0.00000000 |
| C | 1.41830000  | -5.32580000 | 0.00000000 |
| C | 0.69940000  | -6.51860000 | 0.00000000 |
| C | -0.69940000 | -6.51860000 | 0.00000000 |
| C | -1.41830000 | -5.32580000 | 0.00000000 |
| H | -5.32100000 | -2.50500000 | 0.00000000 |
| H | -7.46730000 | -1.23270000 | 0.00000000 |
| H | -7.46730000 | 1.23270000  | 0.00000000 |
| H | -5.32100000 | 2.50500000  | 0.00000000 |
| H | -2.50500000 | 5.32100000  | 0.00000000 |
| H | -1.23270000 | 7.46730000  | 0.00000000 |
| H | 1.23270000  | 7.46730000  | 0.00000000 |
| H | 2.50500000  | 5.32100000  | 0.00000000 |
| H | 5.32100000  | 2.50500000  | 0.00000000 |
| H | 7.46730000  | 1.23270000  | 0.00000000 |
| H | 7.46730000  | -1.23270000 | 0.00000000 |
| H | 5.32100000  | -2.50500000 | 0.00000000 |
| H | 2.50500000  | -5.32100000 | 0.00000000 |
| H | 1.23270000  | -7.46730000 | 0.00000000 |
| H | -1.23270000 | -7.46730000 | 0.00000000 |
| H | -2.50500000 | -5.32100000 | 0.00000000 |

level of theory s12g  
spin state HS

| Occup.          | alpha   | beta |
|-----------------|---------|------|
| A <sub>1g</sub> | 21.0 // | 20.0 |
| A <sub>2g</sub> | 11.0 // | 11.0 |
| B <sub>1g</sub> | 16.0 // | 15.0 |
| B <sub>2g</sub> | 14.0 // | 13.0 |
| E <sub>1g</sub> | 12.0 // | 10.0 |
| A <sub>1u</sub> | 2.0 //  | 2.0  |
| A <sub>2u</sub> | 6.0 //  | 6.0  |
| B <sub>1u</sub> | 2.0 //  | 2.0  |
| B <sub>2u</sub> | 3.0 //  | 3.0  |
| E <sub>1u</sub> | 60.0 // | 60.0 |

|    |             |             |            |
|----|-------------|-------------|------------|
| Mn | 0.00000000  | 0.00000000  | 0.00000000 |
| N  | 2.40525665  | 2.40525665  | 0.00000000 |
| N  | -2.40525665 | 2.40525665  | 0.00000000 |
| N  | -2.40525665 | -2.40525665 | 0.00000000 |
| N  | 2.40525665  | -2.40525665 | 0.00000000 |
| N  | 0.00000000  | 2.02877984  | 0.00000000 |
| C  | 1.13026386  | 2.80832619  | 0.00000000 |
| C  | 0.70576105  | 4.20483448  | 0.00000000 |
| C  | -0.70576105 | 4.20483448  | 0.00000000 |
| C  | -1.13026386 | 2.80832619  | 0.00000000 |

|   |             |             |            |
|---|-------------|-------------|------------|
| N | -2.02877984 | 0.00000000  | 0.00000000 |
| C | -2.80832619 | 1.13026386  | 0.00000000 |
| C | -4.20483448 | 0.70576105  | 0.00000000 |
| C | -4.20483448 | -0.70576105 | 0.00000000 |
| C | -2.80832619 | -1.13026386 | 0.00000000 |
| N | 0.00000000  | -2.02877984 | 0.00000000 |
| C | -1.13026386 | -2.80832619 | 0.00000000 |
| C | -0.70576105 | -4.20483448 | 0.00000000 |
| C | 0.70576105  | -4.20483448 | 0.00000000 |
| C | 1.13026386  | -2.80832619 | 0.00000000 |
| N | 2.02877984  | 0.00000000  | 0.00000000 |
| C | 2.80832619  | -1.13026386 | 0.00000000 |
| C | 4.20483448  | -0.70576105 | 0.00000000 |
| C | 4.20483448  | 0.70576105  | 0.00000000 |
| C | 2.80832619  | 1.13026386  | 0.00000000 |
| C | -5.39926056 | -1.41957089 | 0.00000000 |
| C | -6.59083542 | -0.70135406 | 0.00000000 |
| C | -6.59083542 | 0.70135406  | 0.00000000 |
| C | -5.39926056 | 1.41957089  | 0.00000000 |
| C | -1.41957089 | 5.39926056  | 0.00000000 |
| C | -0.70135406 | 6.59083542  | 0.00000000 |
| C | 0.70135406  | 6.59083542  | 0.00000000 |
| C | 1.41957089  | 5.39926056  | 0.00000000 |
| C | 5.39926056  | 1.41957089  | 0.00000000 |
| C | 6.59083542  | 0.70135406  | 0.00000000 |
| C | 6.59083542  | -0.70135406 | 0.00000000 |
| C | 5.39926056  | -1.41957089 | 0.00000000 |
| C | 1.41957089  | -5.39926056 | 0.00000000 |
| C | 0.70135406  | -6.59083542 | 0.00000000 |
| C | -0.70135406 | -6.59083542 | 0.00000000 |
| C | -1.41957089 | -5.39926056 | 0.00000000 |
| H | -5.39190711 | -2.50781649 | 0.00000000 |
| H | -7.54107742 | -1.23396832 | 0.00000000 |
| H | -7.54107742 | 1.23396832  | 0.00000000 |
| H | -5.39190711 | 2.50781649  | 0.00000000 |
| H | -2.50781649 | 5.39190711  | 0.00000000 |
| H | -1.23396832 | 7.54107742  | 0.00000000 |
| H | 1.23396832  | 7.54107742  | 0.00000000 |
| H | 2.50781649  | 5.39190711  | 0.00000000 |
| H | 5.39190711  | 2.50781649  | 0.00000000 |
| H | 7.54107742  | 1.23396832  | 0.00000000 |
| H | 7.54107742  | -1.23396832 | 0.00000000 |
| H | 5.39190711  | -2.50781649 | 0.00000000 |
| H | 2.50781649  | -5.39190711 | 0.00000000 |
| H | 1.23396832  | -7.54107742 | 0.00000000 |
| H | -1.23396832 | -7.54107742 | 0.00000000 |
| H | -2.50781649 | -5.39190711 | 0.00000000 |

level of theory s12g  
spin state IS

| Occup.          | alpha        | beta |
|-----------------|--------------|------|
| A <sub>1g</sub> | 21.0 // 20.0 |      |
| A <sub>2g</sub> | 11.0 // 11.0 |      |
| B <sub>1g</sub> | 15.0 // 15.0 |      |

|                 |              |
|-----------------|--------------|
| B <sub>2g</sub> | 14.0 // 13.0 |
| E <sub>1g</sub> | 12.0 // 11.0 |
| A <sub>1u</sub> | 2.0 // 2.0   |
| A <sub>2u</sub> | 6.0 // 6.0   |
| B <sub>1u</sub> | 2.0 // 2.0   |
| B <sub>2u</sub> | 3.0 // 3.0   |
| E <sub>1u</sub> | 60.0 // 60.0 |

|    |             |             |            |
|----|-------------|-------------|------------|
| Mn | 0.00000000  | 0.00000000  | 0.00000000 |
| N  | 2.39712954  | 2.39712954  | 0.00000000 |
| N  | -2.39712954 | 2.39712954  | 0.00000000 |
| N  | -2.39712954 | -2.39712954 | 0.00000000 |
| N  | 2.39712954  | -2.39712954 | 0.00000000 |
| N  | 0.00000000  | 1.95179990  | 0.00000000 |
| C  | 1.12694063  | 2.76777164  | 0.00000000 |
| C  | 0.70206263  | 4.15002547  | 0.00000000 |
| C  | -0.70206263 | 4.15002547  | 0.00000000 |
| C  | -1.12694063 | 2.76777164  | 0.00000000 |
| N  | -1.95179990 | 0.00000000  | 0.00000000 |
| C  | -2.76777164 | 1.12694063  | 0.00000000 |
| C  | -4.15002547 | 0.70206263  | 0.00000000 |
| C  | -4.15002547 | -0.70206263 | 0.00000000 |
| C  | -2.76777164 | -1.12694063 | 0.00000000 |
| N  | 0.00000000  | -1.95179990 | 0.00000000 |
| C  | -1.12694063 | -2.76777164 | 0.00000000 |
| C  | -0.70206263 | -4.15002547 | 0.00000000 |
| C  | 0.70206263  | -4.15002547 | 0.00000000 |
| C  | 1.12694063  | -2.76777164 | 0.00000000 |
| N  | 1.95179990  | 0.00000000  | 0.00000000 |
| C  | 2.76777164  | -1.12694063 | 0.00000000 |
| C  | 4.15002547  | -0.70206263 | 0.00000000 |
| C  | 4.15002547  | 0.70206263  | 0.00000000 |
| C  | 2.76777164  | 1.12694063  | 0.00000000 |
| C  | -5.34442403 | -1.42105629 | 0.00000000 |
| C  | -6.53332127 | -0.70284264 | 0.00000000 |
| C  | -6.53332127 | 0.70284264  | 0.00000000 |
| C  | -5.34442403 | 1.42105629  | 0.00000000 |
| C  | -1.42105629 | 5.34442403  | 0.00000000 |
| C  | -0.70284264 | 6.53332127  | 0.00000000 |
| C  | 0.70284264  | 6.53332127  | 0.00000000 |
| C  | 1.42105629  | 5.34442403  | 0.00000000 |
| C  | 5.34442403  | 1.42105629  | 0.00000000 |
| C  | 6.53332127  | 0.70284264  | 0.00000000 |
| C  | 6.53332127  | -0.70284264 | 0.00000000 |
| C  | 5.34442403  | -1.42105629 | 0.00000000 |
| C  | 1.42105629  | -5.34442403 | 0.00000000 |
| C  | 0.70284264  | -6.53332127 | 0.00000000 |
| C  | -0.70284264 | -6.53332127 | 0.00000000 |
| C  | -1.42105629 | -5.34442403 | 0.00000000 |
| H  | -5.33454482 | -2.50909075 | 0.00000000 |
| H  | -7.48398026 | -1.23451284 | 0.00000000 |
| H  | -7.48398026 | 1.23451284  | 0.00000000 |
| H  | -5.33454482 | 2.50909075  | 0.00000000 |
| H  | -2.50909075 | 5.33454482  | 0.00000000 |

|   |             |             |            |
|---|-------------|-------------|------------|
| H | -1.23451284 | 7.48398026  | 0.00000000 |
| H | 1.23451284  | 7.48398026  | 0.00000000 |
| H | 2.50909075  | 5.33454482  | 0.00000000 |
| H | 5.33454482  | 2.50909075  | 0.00000000 |
| H | 7.48398026  | 1.23451284  | 0.00000000 |
| H | 7.48398026  | -1.23451284 | 0.00000000 |
| H | 5.33454482  | -2.50909075 | 0.00000000 |
| H | 2.50909075  | -5.33454482 | 0.00000000 |
| H | 1.23451284  | -7.48398026 | 0.00000000 |
| H | -1.23451284 | -7.48398026 | 0.00000000 |
| H | -2.50909075 | -5.33454482 | 0.00000000 |

level of theory s12g  
spin state IS2

| Occup.          | alpha   | beta |
|-----------------|---------|------|
| A <sub>1g</sub> | 21.0 // | 20.0 |
| A <sub>2g</sub> | 11.0 // | 11.0 |
| B <sub>1g</sub> | 15.0 // | 15.0 |
| B <sub>2g</sub> | 14.0 // | 14.0 |
| E <sub>1g</sub> | 12.0 // | 10.0 |
| A <sub>1u</sub> | 2.0 //  | 2.0  |
| A <sub>2u</sub> | 6.0 //  | 6.0  |
| B <sub>1u</sub> | 2.0 //  | 2.0  |
| B <sub>2u</sub> | 3.0 //  | 3.0  |
| E <sub>1u</sub> | 60.0 // | 60.0 |

|    |             |             |            |
|----|-------------|-------------|------------|
| Mn | 0.00000000  | 0.00000000  | 0.00000000 |
| N  | 2.39453816  | 2.39453816  | 0.00000000 |
| N  | -2.39453816 | 2.39453816  | 0.00000000 |
| N  | -2.39453816 | -2.39453816 | 0.00000000 |
| N  | 2.39453816  | -2.39453816 | 0.00000000 |
| N  | 0.00000000  | 1.95774679  | 0.00000000 |
| C  | 1.12011213  | 2.76632540  | 0.00000000 |
| C  | 0.70235579  | 4.15610625  | 0.00000000 |
| C  | -0.70235579 | 4.15610625  | 0.00000000 |
| C  | -1.12011213 | 2.76632540  | 0.00000000 |
| N  | -1.95774679 | 0.00000000  | 0.00000000 |
| C  | -2.76632540 | 1.12011213  | 0.00000000 |
| C  | -4.15610625 | 0.70235579  | 0.00000000 |
| C  | -4.15610625 | -0.70235579 | 0.00000000 |
| C  | -2.76632540 | -1.12011213 | 0.00000000 |
| N  | 0.00000000  | -1.95774679 | 0.00000000 |
| C  | -1.12011213 | -2.76632540 | 0.00000000 |
| C  | -0.70235579 | -4.15610625 | 0.00000000 |
| C  | 0.70235579  | -4.15610625 | 0.00000000 |
| C  | 1.12011213  | -2.76632540 | 0.00000000 |
| N  | 1.95774679  | 0.00000000  | 0.00000000 |
| C  | 2.76632540  | -1.12011213 | 0.00000000 |
| C  | 4.15610625  | -0.70235579 | 0.00000000 |
| C  | 4.15610625  | 0.70235579  | 0.00000000 |
| C  | 2.76632540  | 1.12011213  | 0.00000000 |
| C  | -5.34919986 | -1.42093246 | 0.00000000 |
| C  | -6.53895065 | -0.70233516 | 0.00000000 |

|   |             |             |            |
|---|-------------|-------------|------------|
| C | -6.53895065 | 0.70233516  | 0.00000000 |
| C | -5.34919986 | 1.42093246  | 0.00000000 |
| C | -1.42093246 | 5.34919986  | 0.00000000 |
| C | -0.70233516 | 6.53895065  | 0.00000000 |
| C | 0.70233516  | 6.53895065  | 0.00000000 |
| C | 1.42093246  | 5.34919986  | 0.00000000 |
| C | 5.34919986  | 1.42093246  | 0.00000000 |
| C | 6.53895065  | 0.70233516  | 0.00000000 |
| C | 6.53895065  | -0.70233516 | 0.00000000 |
| C | 5.34919986  | -1.42093246 | 0.00000000 |
| C | 1.42093246  | -5.34919986 | 0.00000000 |
| C | 0.70233516  | -6.53895065 | 0.00000000 |
| C | -0.70233516 | -6.53895065 | 0.00000000 |
| C | -1.42093246 | -5.34919986 | 0.00000000 |
| H | -5.33905236 | -2.50904471 | 0.00000000 |
| H | -7.48980491 | -1.23373812 | 0.00000000 |
| H | -7.48980491 | 1.23373812  | 0.00000000 |
| H | -5.33905236 | 2.50904471  | 0.00000000 |
| H | -2.50904471 | 5.33905236  | 0.00000000 |
| H | -1.23373812 | 7.48980491  | 0.00000000 |
| H | 1.23373812  | 7.48980491  | 0.00000000 |
| H | 2.50904471  | 5.33905236  | 0.00000000 |
| H | 5.33905236  | 2.50904471  | 0.00000000 |
| H | 7.48980491  | 1.23373812  | 0.00000000 |
| H | 7.48980491  | -1.23373812 | 0.00000000 |
| H | 5.33905236  | -2.50904471 | 0.00000000 |
| H | 2.50904471  | -5.33905236 | 0.00000000 |
| H | 1.23373812  | -7.48980491 | 0.00000000 |
| H | -1.23373812 | -7.48980491 | 0.00000000 |
| H | -2.50904471 | -5.33905236 | 0.00000000 |

level of theory s12g  
spin state IS3

| Occup.          | alpha   | beta |
|-----------------|---------|------|
| A <sub>1g</sub> | 21.0 // | 21.0 |
| A <sub>2g</sub> | 11.0 // | 11.0 |
| B <sub>1g</sub> | 15.0 // | 15.0 |
| B <sub>2g</sub> | 14.0 // | 13.0 |
| E <sub>1g</sub> | 12.0 // | 10.0 |
| A <sub>1u</sub> | 2.0 //  | 2.0  |
| A <sub>2u</sub> | 6.0 //  | 6.0  |
| B <sub>1u</sub> | 2.0 //  | 2.0  |
| B <sub>2u</sub> | 3.0 //  | 3.0  |
| E <sub>1u</sub> | 60.0 // | 60.0 |

|    |             |             |            |
|----|-------------|-------------|------------|
| Mn | 0.00000000  | 0.00000000  | 0.00000000 |
| N  | 2.39383065  | 2.39383065  | 0.00000000 |
| N  | -2.39383065 | 2.39383065  | 0.00000000 |
| N  | -2.39383065 | -2.39383065 | 0.00000000 |
| N  | 2.39383065  | -2.39383065 | 0.00000000 |
| N  | 0.00000000  | 1.95651434  | 0.00000000 |
| C  | 1.12116572  | 2.76441295  | 0.00000000 |
| C  | 0.70165252  | 4.15329314  | 0.00000000 |

|   |             |             |            |                 |             |             |            |
|---|-------------|-------------|------------|-----------------|-------------|-------------|------------|
| C | -0.70165252 | 4.15329314  | 0.00000000 | A <sub>2g</sub> | 11.0        | //          | 11.0       |
| C | -1.12116572 | 2.76441295  | 0.00000000 | B <sub>1g</sub> | 15.0        | //          | 15.0       |
| N | -1.95651434 | 0.00000000  | 0.00000000 | B <sub>2g</sub> | 14.0        | //          | 13.0       |
| C | -2.76441295 | 1.12116572  | 0.00000000 | E <sub>1g</sub> | 12.0        | //          | 12.0       |
| C | -4.15329314 | 0.70165252  | 0.00000000 | A <sub>1u</sub> | 1.0         | //          | 2.0        |
| C | -4.15329314 | -0.70165252 | 0.00000000 | A <sub>2u</sub> | 6.0         | //          | 6.0        |
| C | -2.76441295 | -1.12116572 | 0.00000000 | B <sub>1u</sub> | 2.0         | //          | 2.0        |
| N | 0.00000000  | -1.95651434 | 0.00000000 | B <sub>2u</sub> | 3.0         | //          | 3.0        |
| C | -1.12116572 | -2.76441295 | 0.00000000 | E <sub>1u</sub> | 60.0        | //          | 60.0       |
| C | -0.70165252 | -4.15329314 | 0.00000000 |                 |             |             |            |
| C | 0.70165252  | -4.15329314 | 0.00000000 |                 |             |             |            |
| C | 1.12116572  | -2.76441295 | 0.00000000 | Mn              | 0.00000000  | 0.00000000  | 0.00000000 |
| N | 1.95651434  | 0.00000000  | 0.00000000 | N               | 2.39990084  | 2.39990084  | 0.00000000 |
| C | 2.76441295  | -1.12116572 | 0.00000000 | N               | -2.39990084 | 2.39990084  | 0.00000000 |
| C | 4.15329314  | -0.70165252 | 0.00000000 | N               | -2.39990084 | -2.39990084 | 0.00000000 |
| C | 4.15329314  | 0.70165252  | 0.00000000 | N               | 2.39990084  | -2.39990084 | 0.00000000 |
| C | 2.76441295  | 1.12116572  | 0.00000000 | N               | 0.00000000  | 1.94279225  | 0.00000000 |
| C | -5.34555224 | -1.42121028 | 0.00000000 | C               | 1.12673796  | 2.76405470  | 0.00000000 |
| C | -6.53523054 | -0.70221345 | 0.00000000 | C               | 0.70084288  | 4.15092560  | 0.00000000 |
| C | -6.53523054 | 0.70221345  | 0.00000000 | C               | -0.70084288 | 4.15092560  | 0.00000000 |
| C | -5.34555224 | 1.42121028  | 0.00000000 | C               | -1.12673796 | 2.76405470  | 0.00000000 |
| C | -1.42121028 | 5.34555224  | 0.00000000 | N               | -1.94279225 | 0.00000000  | 0.00000000 |
| C | -0.70221345 | 6.53523054  | 0.00000000 | C               | -2.76405470 | 1.12673796  | 0.00000000 |
| C | 0.70221345  | 6.53523054  | 0.00000000 | C               | -4.15092560 | 0.70084288  | 0.00000000 |
| C | 1.42121028  | 5.34555224  | 0.00000000 | C               | -4.15092560 | -0.70084288 | 0.00000000 |
| C | 5.34555224  | 1.42121028  | 0.00000000 | C               | -2.76405470 | -1.12673796 | 0.00000000 |
| C | 6.53523054  | 0.70221345  | 0.00000000 | N               | 0.00000000  | -1.94279225 | 0.00000000 |
| C | 6.53523054  | -0.70221345 | 0.00000000 | C               | -1.12673796 | -2.76405470 | 0.00000000 |
| C | 5.34555224  | -1.42121028 | 0.00000000 | C               | -0.70084288 | -4.15092560 | 0.00000000 |
| C | 1.42121028  | -5.34555224 | 0.00000000 | C               | 0.70084288  | -4.15092560 | 0.00000000 |
| C | 0.70221345  | -6.53523054 | 0.00000000 | C               | 1.12673796  | -2.76405470 | 0.00000000 |
| C | -0.70221345 | -6.53523054 | 0.00000000 | N               | 1.94279225  | 0.00000000  | 0.00000000 |
| C | -1.42121028 | -5.34555224 | 0.00000000 | C               | 2.76405470  | -1.12673796 | 0.00000000 |
| H | -5.33675837 | -2.50920346 | 0.00000000 | C               | 4.15092560  | -0.70084288 | 0.00000000 |
| H | -7.48588688 | -1.23386566 | 0.00000000 | C               | 4.15092560  | 0.70084288  | 0.00000000 |
| H | -7.48588688 | 1.23386566  | 0.00000000 | C               | 2.76405470  | 1.12673796  | 0.00000000 |
| H | -5.33675837 | 2.50920346  | 0.00000000 | C               | -5.34136327 | -1.41897080 | 0.00000000 |
| H | -2.50920346 | 5.33675837  | 0.00000000 | C               | -6.53645347 | -0.70023644 | 0.00000000 |
| H | -1.23386566 | 7.48588688  | 0.00000000 | C               | -6.53645347 | 0.70023644  | 0.00000000 |
| H | 1.23386566  | 7.48588688  | 0.00000000 | C               | -5.34136327 | 1.41897080  | 0.00000000 |
| H | 2.50920346  | 5.33675837  | 0.00000000 | C               | -1.41897080 | 5.34136327  | 0.00000000 |
| H | 5.33675837  | 2.50920346  | 0.00000000 | C               | -0.70023644 | 6.53645347  | 0.00000000 |
| H | 7.48588688  | 1.23386566  | 0.00000000 | C               | 0.70023644  | 6.53645347  | 0.00000000 |
| H | 7.48588688  | -1.23386566 | 0.00000000 | C               | 1.41897080  | 5.34136327  | 0.00000000 |
| H | 5.33675837  | -2.50920346 | 0.00000000 | C               | 5.34136327  | 1.41897080  | 0.00000000 |
| H | 2.50920346  | -5.33675837 | 0.00000000 | C               | 6.53645347  | 0.70023644  | 0.00000000 |
| H | 1.23386566  | -7.48588688 | 0.00000000 | C               | 6.53645347  | -0.70023644 | 0.00000000 |
| H | -1.23386566 | -7.48588688 | 0.00000000 | C               | 5.34136327  | -1.41897080 | 0.00000000 |
| H | -2.50920346 | -5.33675837 | 0.00000000 | C               | 1.41897080  | -5.34136327 | 0.00000000 |
|   |             |             |            | C               | 0.70023644  | -6.53645347 | 0.00000000 |
|   |             |             |            | C               | -0.70023644 | -6.53645347 | 0.00000000 |
|   |             |             |            | C               | -1.41897080 | -5.34136327 | 0.00000000 |
|   |             |             |            | H               | -5.33125070 | -2.50709310 | 0.00000000 |
|   |             |             |            | H               | -7.48566039 | -1.23432498 | 0.00000000 |
|   |             |             |            | H               | -7.48566039 | 1.23432498  | 0.00000000 |

level of theory s12g  
spin state LS

| Occup.          | alpha | beta    |
|-----------------|-------|---------|
| A <sub>1g</sub> | 21.0  | // 20.0 |

|   |             |             |            |
|---|-------------|-------------|------------|
| H | -5.33125070 | 2.50709310  | 0.00000000 |
| H | -2.50709310 | 5.33125070  | 0.00000000 |
| H | -1.23432498 | 7.48566039  | 0.00000000 |
| H | 1.23432498  | 7.48566039  | 0.00000000 |
| H | 2.50709310  | 5.33125070  | 0.00000000 |
| H | 5.33125070  | 2.50709310  | 0.00000000 |
| H | 7.48566039  | 1.23432498  | 0.00000000 |
| H | 7.48566039  | -1.23432498 | 0.00000000 |
| H | 5.33125070  | -2.50709310 | 0.00000000 |
| H | 2.50709310  | -5.33125070 | 0.00000000 |
| H | 1.23432498  | -7.48566039 | 0.00000000 |
| H | -1.23432498 | -7.48566039 | 0.00000000 |
| H | -2.50709310 | -5.33125070 | 0.00000000 |

level of theory ssb-d  
spin state HS

| Occup.          | alpha   | beta |
|-----------------|---------|------|
| A <sub>1g</sub> | 21.0 // | 20.0 |
| A <sub>2g</sub> | 11.0 // | 11.0 |
| B <sub>1g</sub> | 16.0 // | 15.0 |
| B <sub>2g</sub> | 14.0 // | 13.0 |
| E <sub>1g</sub> | 12.0 // | 10.0 |
| A <sub>1u</sub> | 2.0 //  | 2.0  |
| A <sub>2u</sub> | 6.0 //  | 6.0  |
| B <sub>1u</sub> | 2.0 //  | 2.0  |
| B <sub>2u</sub> | 3.0 //  | 3.0  |
| E <sub>1u</sub> | 60.0 // | 60.0 |

|    |             |             |            |
|----|-------------|-------------|------------|
| Mn | 0.00000000  | 0.00000000  | 0.00000000 |
| N  | 2.40640972  | 2.40640972  | 0.00000000 |
| N  | -2.40640972 | 2.40640972  | 0.00000000 |
| N  | -2.40640972 | -2.40640972 | 0.00000000 |
| N  | 2.40640972  | -2.40640972 | 0.00000000 |
| N  | 0.00000000  | 2.02121049  | 0.00000000 |
| C  | 1.12800004  | 2.80138180  | 0.00000000 |
| C  | 0.70471328  | 4.19439275  | 0.00000000 |
| C  | -0.70471328 | 4.19439275  | 0.00000000 |
| C  | -1.12800004 | 2.80138180  | 0.00000000 |
| N  | -2.02121049 | 0.00000000  | 0.00000000 |
| C  | -2.80138180 | 1.12800004  | 0.00000000 |
| C  | -4.19439275 | 0.70471328  | 0.00000000 |
| C  | -4.19439275 | -0.70471328 | 0.00000000 |
| C  | -2.80138180 | -1.12800004 | 0.00000000 |
| N  | 0.00000000  | -2.02121049 | 0.00000000 |
| C  | -1.12800004 | -2.80138180 | 0.00000000 |
| C  | -0.70471328 | -4.19439275 | 0.00000000 |
| C  | 0.70471328  | -4.19439275 | 0.00000000 |
| C  | 1.12800004  | -2.80138180 | 0.00000000 |
| N  | 2.02121049  | 0.00000000  | 0.00000000 |
| C  | 2.80138180  | -1.12800004 | 0.00000000 |
| C  | 4.19439275  | -0.70471328 | 0.00000000 |
| C  | 4.19439275  | 0.70471328  | 0.00000000 |
| C  | 2.80138180  | 1.12800004  | 0.00000000 |

|   |             |             |            |
|---|-------------|-------------|------------|
| C | -5.38663333 | -1.41929519 | 0.00000000 |
| C | -6.57619785 | -0.70085029 | 0.00000000 |
| C | -6.57619785 | 0.70085029  | 0.00000000 |
| C | -5.38663333 | 1.41929519  | 0.00000000 |
| C | -1.41929519 | 5.38663333  | 0.00000000 |
| C | -0.70085029 | 6.57619785  | 0.00000000 |
| C | 0.70085029  | 6.57619785  | 0.00000000 |
| C | 1.41929519  | 5.38663333  | 0.00000000 |
| C | 5.38663333  | 1.41929519  | 0.00000000 |
| C | 6.57619785  | 0.70085029  | 0.00000000 |
| C | 6.57619785  | -0.70085029 | 0.00000000 |
| C | 5.38663333  | -1.41929519 | 0.00000000 |
| C | 1.41929519  | -5.38663333 | 0.00000000 |
| C | 0.70085029  | -6.57619785 | 0.00000000 |
| C | -0.70085029 | -6.57619785 | 0.00000000 |
| C | -1.41929519 | -5.38663333 | 0.00000000 |
| H | -5.37736690 | -2.50103720 | 0.00000000 |
| H | -7.52133911 | -1.22916074 | 0.00000000 |
| H | -7.52133911 | 1.22916074  | 0.00000000 |
| H | -5.37736690 | 2.50103720  | 0.00000000 |
| H | -2.50103720 | 5.37736690  | 0.00000000 |
| H | -1.22916074 | 7.52133911  | 0.00000000 |
| H | 1.22916074  | 7.52133911  | 0.00000000 |
| H | 2.50103720  | 5.37736690  | 0.00000000 |
| H | 5.37736690  | 2.50103720  | 0.00000000 |
| H | 7.52133911  | 1.22916074  | 0.00000000 |
| H | 7.52133911  | -1.22916074 | 0.00000000 |
| H | 5.37736690  | -2.50103720 | 0.00000000 |
| H | 2.50103720  | -5.37736690 | 0.00000000 |
| H | 1.22916074  | -7.52133911 | 0.00000000 |
| H | -1.22916074 | -7.52133911 | 0.00000000 |
| H | -2.50103720 | -5.37736690 | 0.00000000 |

level of theory ssb-d  
spin state IS

| Occup.          | alpha   | beta |
|-----------------|---------|------|
| A <sub>1g</sub> | 21.0 // | 20.0 |
| A <sub>2g</sub> | 11.0 // | 11.0 |
| B <sub>1g</sub> | 15.0 // | 15.0 |
| B <sub>2g</sub> | 14.0 // | 13.0 |
| E <sub>1g</sub> | 12.0 // | 11.0 |
| A <sub>1u</sub> | 2.0 //  | 2.0  |
| A <sub>2u</sub> | 6.0 //  | 6.0  |
| B <sub>1u</sub> | 2.0 //  | 2.0  |
| B <sub>2u</sub> | 3.0 //  | 3.0  |
| E <sub>1u</sub> | 60.0 // | 60.0 |

|    |             |             |            |
|----|-------------|-------------|------------|
| Mn | 0.00000000  | 0.00000000  | 0.00000000 |
| N  | 2.39971457  | 2.39971457  | 0.00000000 |
| N  | -2.39971457 | 2.39971457  | 0.00000000 |
| N  | -2.39971457 | -2.39971457 | 0.00000000 |
| N  | 2.39971457  | -2.39971457 | 0.00000000 |
| N  | 0.00000000  | 1.94728020  | 0.00000000 |

|   |             |             |            |
|---|-------------|-------------|------------|
| C | 1.12653634  | 2.76272064  | 0.00000000 |
| C | 0.70117255  | 4.14097919  | 0.00000000 |
| C | -0.70117255 | 4.14097919  | 0.00000000 |
| C | -1.12653634 | 2.76272064  | 0.00000000 |
| N | -1.94728020 | 0.00000000  | 0.00000000 |
| C | -2.76272064 | 1.12653634  | 0.00000000 |
| C | -4.14097919 | 0.70117255  | 0.00000000 |
| C | -4.14097919 | -0.70117255 | 0.00000000 |
| C | -2.76272064 | -1.12653634 | 0.00000000 |
| N | 0.00000000  | -1.94728020 | 0.00000000 |
| C | -1.12653634 | -2.76272064 | 0.00000000 |
| C | -0.70117255 | -4.14097919 | 0.00000000 |
| C | 0.70117255  | -4.14097919 | 0.00000000 |
| C | 1.12653634  | -2.76272064 | 0.00000000 |
| N | 1.94728020  | 0.00000000  | 0.00000000 |
| C | 2.76272064  | -1.12653634 | 0.00000000 |
| C | 4.14097919  | -0.70117255 | 0.00000000 |
| C | 4.14097919  | 0.70117255  | 0.00000000 |
| C | 2.76272064  | 1.12653634  | 0.00000000 |
| C | -5.33326580 | -1.42083721 | 0.00000000 |
| C | -6.52002251 | -0.70239178 | 0.00000000 |
| C | -6.52002251 | 0.70239178  | 0.00000000 |
| C | -5.33326580 | 1.42083721  | 0.00000000 |
| C | -1.42083721 | 5.33326580  | 0.00000000 |
| C | -0.70239178 | 6.52002251  | 0.00000000 |
| C | 0.70239178  | 6.52002251  | 0.00000000 |
| C | 1.42083721  | 5.33326580  | 0.00000000 |
| C | 5.33326580  | 1.42083721  | 0.00000000 |
| C | 6.52002251  | 0.70239178  | 0.00000000 |
| C | 6.52002251  | -0.70239178 | 0.00000000 |
| C | 5.33326580  | -1.42083721 | 0.00000000 |
| C | 1.42083721  | -5.33326580 | 0.00000000 |
| C | 0.70239178  | -6.52002251 | 0.00000000 |
| C | -0.70239178 | -6.52002251 | 0.00000000 |
| C | -1.42083721 | -5.33326580 | 0.00000000 |
| H | -5.32338765 | -2.50236226 | 0.00000000 |
| H | -7.46542624 | -1.23018258 | 0.00000000 |
| H | -7.46542624 | 1.23018258  | 0.00000000 |
| H | -5.32338765 | 2.50236226  | 0.00000000 |
| H | -2.50236226 | 5.32338765  | 0.00000000 |
| H | -1.23018258 | 7.46542624  | 0.00000000 |
| H | 1.23018258  | 7.46542624  | 0.00000000 |
| H | 2.50236226  | 5.32338765  | 0.00000000 |
| H | 5.32338765  | 2.50236226  | 0.00000000 |
| H | 7.46542624  | 1.23018258  | 0.00000000 |
| H | 7.46542624  | -1.23018258 | 0.00000000 |
| H | 5.32338765  | -2.50236226 | 0.00000000 |
| H | 2.50236226  | -5.32338765 | 0.00000000 |
| H | 1.23018258  | -7.46542624 | 0.00000000 |
| H | -1.23018258 | -7.46542624 | 0.00000000 |
| H | -2.50236226 | -5.32338765 | 0.00000000 |

level of theory ssb-d  
spin state IS2

| Occup.          | alpha       | beta        |            |
|-----------------|-------------|-------------|------------|
| A <sub>1g</sub> | 21.0        | //          | 20.0       |
| A <sub>2g</sub> | 11.0        | //          | 11.0       |
| B <sub>1g</sub> | 15.0        | //          | 15.0       |
| B <sub>2g</sub> | 14.0        | //          | 14.0       |
| E <sub>1g</sub> | 12.0        | //          | 10.0       |
| A <sub>1u</sub> | 2.0         | //          | 2.0        |
| A <sub>2u</sub> | 6.0         | //          | 6.0        |
| B <sub>1u</sub> | 2.0         | //          | 2.0        |
| B <sub>2u</sub> | 3.0         | //          | 3.0        |
| E <sub>1u</sub> | 60.0        | //          | 60.0       |
| Mn              | 0.00000000  | 0.00000000  | 0.00000000 |
| N               | 2.39606166  | 2.39606166  | 0.00000000 |
| N               | -2.39606166 | 2.39606166  | 0.00000000 |
| N               | -2.39606166 | -2.39606166 | 0.00000000 |
| N               | 2.39606166  | -2.39606166 | 0.00000000 |
| N               | 0.00000000  | 1.95261907  | 0.00000000 |
| C               | 1.11848914  | 2.76064097  | 0.00000000 |
| C               | 0.70123976  | 4.14738964  | 0.00000000 |
| C               | -0.70123976 | 4.14738964  | 0.00000000 |
| C               | -1.11848914 | 2.76064097  | 0.00000000 |
| N               | -1.95261907 | 0.00000000  | 0.00000000 |
| C               | -2.76064097 | 1.11848914  | 0.00000000 |
| C               | -4.14738964 | 0.70123976  | 0.00000000 |
| C               | -4.14738964 | -0.70123976 | 0.00000000 |
| C               | -2.76064097 | -1.11848914 | 0.00000000 |
| N               | 0.00000000  | -1.95261907 | 0.00000000 |
| C               | -1.11848914 | -2.76064097 | 0.00000000 |
| C               | -0.70123976 | -4.14738964 | 0.00000000 |
| C               | 0.70123976  | -4.14738964 | 0.00000000 |
| C               | 1.11848914  | -2.76064097 | 0.00000000 |
| N               | 1.95261907  | 0.00000000  | 0.00000000 |
| C               | 2.76064097  | -1.11848914 | 0.00000000 |
| C               | 4.14738964  | -0.70123976 | 0.00000000 |
| C               | 4.14738964  | 0.70123976  | 0.00000000 |
| C               | 2.76064097  | 1.11848914  | 0.00000000 |
| C               | -5.33795749 | -1.42052658 | 0.00000000 |
| C               | -6.52591173 | -0.70173031 | 0.00000000 |
| C               | -6.52591173 | 0.70173031  | 0.00000000 |
| C               | -5.33795749 | 1.42052658  | 0.00000000 |
| C               | -1.42052658 | 5.33795749  | 0.00000000 |
| C               | -0.70173031 | 6.52591173  | 0.00000000 |
| C               | 0.70173031  | 6.52591173  | 0.00000000 |
| C               | 1.42052658  | 5.33795749  | 0.00000000 |
| C               | 5.33795749  | 1.42052658  | 0.00000000 |
| C               | 6.52591173  | 0.70173031  | 0.00000000 |
| C               | 6.52591173  | -0.70173031 | 0.00000000 |
| C               | 5.33795749  | -1.42052658 | 0.00000000 |
| C               | 1.42052658  | -5.33795749 | 0.00000000 |
| C               | 0.70173031  | -6.52591173 | 0.00000000 |
| C               | -0.70173031 | -6.52591173 | 0.00000000 |
| C               | -1.42052658 | -5.33795749 | 0.00000000 |
| H               | -5.32807828 | -2.50215323 | 0.00000000 |

|   |             |             |            |
|---|-------------|-------------|------------|
| H | -7.47145780 | -1.22934754 | 0.00000000 |
| H | -7.47145780 | 1.22934754  | 0.00000000 |
| H | -5.32807828 | 2.50215323  | 0.00000000 |
| H | -2.50215323 | 5.32807828  | 0.00000000 |
| H | -1.22934754 | 7.47145780  | 0.00000000 |
| H | 1.22934754  | 7.47145780  | 0.00000000 |
| H | 2.50215323  | 5.32807828  | 0.00000000 |
| H | 5.32807828  | 2.50215323  | 0.00000000 |
| H | 7.47145780  | 1.22934754  | 0.00000000 |
| H | 7.47145780  | -1.22934754 | 0.00000000 |
| H | 5.32807828  | -2.50215323 | 0.00000000 |
| H | 2.50215323  | -5.32807828 | 0.00000000 |
| H | 1.22934754  | -7.47145780 | 0.00000000 |
| H | -1.22934754 | -7.47145780 | 0.00000000 |
| H | -2.50215323 | -5.32807828 | 0.00000000 |

level of theory ssb-d  
spin state IS3

| Occup.          | alpha   | beta |
|-----------------|---------|------|
| A <sub>1g</sub> | 21.0 // | 21.0 |
| A <sub>2g</sub> | 11.0 // | 11.0 |
| B <sub>1g</sub> | 15.0 // | 15.0 |
| B <sub>2g</sub> | 14.0 // | 13.0 |
| E <sub>1g</sub> | 12.0 // | 10.0 |
| A <sub>1u</sub> | 2.0 //  | 2.0  |
| A <sub>2u</sub> | 6.0 //  | 6.0  |
| B <sub>1u</sub> | 2.0 //  | 2.0  |
| B <sub>2u</sub> | 3.0 //  | 3.0  |
| E <sub>1u</sub> | 60.0 // | 60.0 |

|    |             |             |            |
|----|-------------|-------------|------------|
| Mn | 0.00000000  | 0.00000000  | 0.00000000 |
| N  | 2.39553513  | 2.39553513  | 0.00000000 |
| N  | -2.39553513 | 2.39553513  | 0.00000000 |
| N  | -2.39553513 | -2.39553513 | 0.00000000 |
| N  | 2.39553513  | -2.39553513 | 0.00000000 |
| N  | 0.00000000  | 1.95287254  | 0.00000000 |
| C  | 1.11984225  | 2.75940111  | 0.00000000 |
| C  | 0.70056770  | 4.14521367  | 0.00000000 |
| C  | -0.70056770 | 4.14521367  | 0.00000000 |
| C  | -1.11984225 | 2.75940111  | 0.00000000 |
| N  | -1.95287254 | 0.00000000  | 0.00000000 |
| C  | -2.75940111 | 1.11984225  | 0.00000000 |
| C  | -4.14521367 | 0.70056770  | 0.00000000 |
| C  | -4.14521367 | -0.70056770 | 0.00000000 |
| C  | -2.75940111 | -1.11984225 | 0.00000000 |
| N  | 0.00000000  | -1.95287254 | 0.00000000 |
| C  | -1.11984225 | -2.75940111 | 0.00000000 |
| C  | -0.70056770 | -4.14521367 | 0.00000000 |
| C  | 0.70056770  | -4.14521367 | 0.00000000 |
| C  | 1.11984225  | -2.75940111 | 0.00000000 |
| N  | 1.95287254  | 0.00000000  | 0.00000000 |
| C  | 2.75940111  | -1.11984225 | 0.00000000 |
| C  | 4.14521367  | -0.70056770 | 0.00000000 |

|   |             |             |            |
|---|-------------|-------------|------------|
| C | 4.14521367  | 0.70056770  | 0.00000000 |
| C | 2.75940111  | 1.11984225  | 0.00000000 |
| C | -5.33514703 | -1.42070068 | 0.00000000 |
| C | -6.52299702 | -0.70162341 | 0.00000000 |
| C | -6.52299702 | 0.70162341  | 0.00000000 |
| C | -5.33514703 | 1.42070068  | 0.00000000 |
| C | -1.42070068 | 5.33514703  | 0.00000000 |
| C | -0.70162341 | 6.52299702  | 0.00000000 |
| C | 0.70162341  | 6.52299702  | 0.00000000 |
| C | 1.42070068  | 5.33514703  | 0.00000000 |
| C | 5.33514703  | 1.42070068  | 0.00000000 |
| C | 6.52299702  | 0.70162341  | 0.00000000 |
| C | 6.52299702  | -0.70162341 | 0.00000000 |
| C | 5.33514703  | -1.42070068 | 0.00000000 |
| C | 1.42070068  | -5.33514703 | 0.00000000 |
| C | 0.70162341  | -6.52299702 | 0.00000000 |
| C | -0.70162341 | -6.52299702 | 0.00000000 |
| C | -1.42070068 | -5.33514703 | 0.00000000 |
| H | -5.32519585 | -2.50224108 | 0.00000000 |
| H | -7.46839546 | -1.22937770 | 0.00000000 |
| H | -7.46839546 | 1.22937770  | 0.00000000 |
| H | -5.32519585 | 2.50224108  | 0.00000000 |
| H | -2.50224108 | 5.32519585  | 0.00000000 |
| H | -1.22937770 | 7.46839546  | 0.00000000 |
| H | 1.22937770  | 7.46839546  | 0.00000000 |
| H | 2.50224108  | 5.32519585  | 0.00000000 |
| H | 5.32519585  | 2.50224108  | 0.00000000 |
| H | 7.46839546  | 1.22937770  | 0.00000000 |
| H | 7.46839546  | -1.22937770 | 0.00000000 |
| H | 5.32519585  | -2.50224108 | 0.00000000 |
| H | 2.50224108  | -5.32519585 | 0.00000000 |
| H | 1.22937770  | -7.46839546 | 0.00000000 |
| H | -1.22937770 | -7.46839546 | 0.00000000 |
| H | -2.50224108 | -5.32519585 | 0.00000000 |

level of theory ssb-d  
spin state LS

| Occup.          | alpha   | beta |
|-----------------|---------|------|
| A <sub>1g</sub> | 20.0 // | 21.0 |
| A <sub>2g</sub> | 11.0 // | 11.0 |
| B <sub>1g</sub> | 15.0 // | 15.0 |
| B <sub>2g</sub> | 14.0 // | 13.0 |
| E <sub>1g</sub> | 12.0 // | 11.0 |
| A <sub>1u</sub> | 2.0 //  | 2.0  |
| A <sub>2u</sub> | 6.0 //  | 6.0  |
| B <sub>1u</sub> | 2.0 //  | 2.0  |
| B <sub>2u</sub> | 3.0 //  | 3.0  |
| E <sub>1u</sub> | 60.0 // | 60.0 |

|    |             |             |            |
|----|-------------|-------------|------------|
| Mn | 0.00000000  | 0.00000000  | 0.00000000 |
| N  | 2.39558752  | 2.39558752  | 0.00000000 |
| N  | -2.39558752 | 2.39558752  | 0.00000000 |
| N  | -2.39558752 | -2.39558752 | 0.00000000 |



|   |             |             |            |
|---|-------------|-------------|------------|
| N | 2.39558752  | -2.39558752 | 0.00000000 |
| N | 0.00000000  | 1.93897529  | 0.00000000 |
| C | 1.12279982  | 2.75721667  | 0.00000000 |
| C | 0.70049732  | 4.13760568  | 0.00000000 |
| C | -0.70049732 | 4.13760568  | 0.00000000 |
| C | -1.12279982 | 2.75721667  | 0.00000000 |
| N | -1.93897529 | 0.00000000  | 0.00000000 |
| C | -2.75721667 | 1.12279982  | 0.00000000 |
| C | -4.13760568 | 0.70049732  | 0.00000000 |
| C | -4.13760568 | -0.70049732 | 0.00000000 |
| C | -2.75721667 | -1.12279982 | 0.00000000 |
| N | 0.00000000  | -1.93897529 | 0.00000000 |
| C | -1.12279982 | -2.75721667 | 0.00000000 |
| C | -0.70049732 | -4.13760568 | 0.00000000 |
| C | 0.70049732  | -4.13760568 | 0.00000000 |
| C | 1.12279982  | -2.75721667 | 0.00000000 |
| N | 1.93897529  | 0.00000000  | 0.00000000 |
| C | 2.75721667  | -1.12279982 | 0.00000000 |
| C | 4.13760568  | -0.70049732 | 0.00000000 |
| C | 4.13760568  | 0.70049732  | 0.00000000 |
| C | 2.75721667  | 1.12279982  | 0.00000000 |
| C | -5.32894031 | -1.42085308 | 0.00000000 |
| C | -6.51610343 | -0.70212825 | 0.00000000 |
| C | -6.51610343 | 0.70212825  | 0.00000000 |
| C | -5.32894031 | 1.42085308  | 0.00000000 |
| C | -1.42085308 | 5.32894031  | 0.00000000 |
| C | -0.70212825 | 6.51610343  | 0.00000000 |
| C | 0.70212825  | 6.51610343  | 0.00000000 |
| C | 1.42085308  | 5.32894031  | 0.00000000 |
| C | 5.32894031  | 1.42085308  | 0.00000000 |
| C | 6.51610343  | 0.70212825  | 0.00000000 |
| C | 6.51610343  | -0.70212825 | 0.00000000 |
| C | 5.32894031  | -1.42085308 | 0.00000000 |
| C | 1.42085308  | -5.32894031 | 0.00000000 |
| C | 0.70212825  | -6.51610343 | 0.00000000 |
| C | -0.70212825 | -6.51610343 | 0.00000000 |
| C | -1.42085308 | -5.32894031 | 0.00000000 |
| H | -5.31818743 | -2.50230511 | 0.00000000 |
| H | -7.46135475 | -1.23002595 | 0.00000000 |
| H | -7.46135475 | 1.23002595  | 0.00000000 |
| H | -5.31818743 | 2.50230511  | 0.00000000 |
| H | -2.50230511 | 5.31818743  | 0.00000000 |
| H | -1.23002595 | 7.46135475  | 0.00000000 |
| H | 1.23002595  | 7.46135475  | 0.00000000 |
| H | 2.50230511  | 5.31818743  | 0.00000000 |
| H | 5.31818743  | 2.50230511  | 0.00000000 |
| H | 7.46135475  | 1.23002595  | 0.00000000 |
| H | 7.46135475  | -1.23002595 | 0.00000000 |
| H | 5.31818743  | -2.50230511 | 0.00000000 |
| H | 2.50230511  | -5.31818743 | 0.00000000 |
| H | 1.23002595  | -7.46135475 | 0.00000000 |
| H | -1.23002595 | -7.46135475 | 0.00000000 |
| H | -2.50230511 | -5.31818743 | 0.00000000 |

level of theory m06l

spin state HS

| Occup.          | alpha |    | beta |
|-----------------|-------|----|------|
| A <sub>1g</sub> | 21.0  | // | 20.0 |
| A <sub>2g</sub> | 11.0  | // | 11.0 |
| B <sub>1g</sub> | 16.0  | // | 15.0 |
| B <sub>2g</sub> | 14.0  | // | 13.0 |
| E <sub>1g</sub> | 12.0  | // | 10.0 |
| A <sub>1u</sub> | 2.0   | // | 2.0  |
| A <sub>2u</sub> | 6.0   | // | 6.0  |
| B <sub>1u</sub> | 2.0   | // | 2.0  |
| B <sub>2u</sub> | 3.0   | // | 3.0  |
| E <sub>1u</sub> | 60.0  | // | 60.0 |

|    |             |             |            |
|----|-------------|-------------|------------|
| Mn | 0.00000000  | 0.00000000  | 0.00000000 |
| N  | 2.38867488  | 2.38867488  | 0.00000000 |
| N  | -2.38867488 | 2.38867488  | 0.00000000 |
| N  | -2.38867488 | -2.38867488 | 0.00000000 |
| N  | 2.38867488  | -2.38867488 | 0.00000000 |
| N  | 0.00000000  | 2.02188784  | 0.00000000 |
| C  | 1.12364968  | 2.79708330  | 0.00000000 |
| C  | 0.70248333  | 4.18556290  | 0.00000000 |
| C  | -0.70248333 | 4.18556290  | 0.00000000 |
| C  | -1.12364968 | 2.79708330  | 0.00000000 |
| N  | -2.02188784 | 0.00000000  | 0.00000000 |
| C  | -2.79708330 | 1.12364968  | 0.00000000 |
| C  | -4.18556290 | 0.70248333  | 0.00000000 |
| C  | -4.18556290 | -0.70248333 | 0.00000000 |
| C  | -2.79708330 | -1.12364968 | 0.00000000 |
| N  | 0.00000000  | -2.02188784 | 0.00000000 |
| C  | -1.12364968 | -2.79708330 | 0.00000000 |
| C  | -0.70248333 | -4.18556290 | 0.00000000 |
| C  | 0.70248333  | -4.18556290 | 0.00000000 |
| C  | 1.12364968  | -2.79708330 | 0.00000000 |
| N  | 2.02188784  | 0.00000000  | 0.00000000 |
| C  | 2.79708330  | -1.12364968 | 0.00000000 |
| C  | 4.18556290  | -0.70248333 | 0.00000000 |
| C  | 4.18556290  | 0.70248333  | 0.00000000 |
| C  | 2.79708330  | 1.12364968  | 0.00000000 |
| C  | -5.37475753 | -1.41284716 | 0.00000000 |
| C  | -6.56093426 | -0.69815730 | 0.00000000 |
| C  | -6.56093426 | 0.69815730  | 0.00000000 |
| C  | -5.37475753 | 1.41284716  | 0.00000000 |
| C  | -1.41284716 | 5.37475753  | 0.00000000 |
| C  | -0.69815730 | 6.56093426  | 0.00000000 |
| C  | 0.69815730  | 6.56093426  | 0.00000000 |
| C  | 1.41284716  | 5.37475753  | 0.00000000 |
| C  | 5.37475753  | 1.41284716  | 0.00000000 |
| C  | 6.56093426  | 0.69815730  | 0.00000000 |
| C  | 6.56093426  | -0.69815730 | 0.00000000 |
| C  | 5.37475753  | -1.41284716 | 0.00000000 |
| C  | 1.41284716  | -5.37475753 | 0.00000000 |
| C  | 0.69815730  | -6.56093426 | 0.00000000 |
| C  | -0.69815730 | -6.56093426 | 0.00000000 |

|   |             |             |            |
|---|-------------|-------------|------------|
| C | -1.41284716 | -5.37475753 | 0.00000000 |
| H | -5.36786870 | -2.49280056 | 0.00000000 |
| H | -7.50360956 | -1.22624233 | 0.00000000 |
| H | -7.50360956 | 1.22624233  | 0.00000000 |
| H | -5.36786870 | 2.49280056  | 0.00000000 |
| H | -2.49280056 | 5.36786870  | 0.00000000 |
| H | -1.22624233 | 7.50360956  | 0.00000000 |
| H | 1.22624233  | 7.50360956  | 0.00000000 |
| H | 2.49280056  | 5.36786870  | 0.00000000 |
| H | 5.36786870  | 2.49280056  | 0.00000000 |
| H | 7.50360956  | 1.22624233  | 0.00000000 |
| H | 7.50360956  | -1.22624233 | 0.00000000 |
| H | 5.36786870  | -2.49280056 | 0.00000000 |
| H | 2.49280056  | -5.36786870 | 0.00000000 |
| H | 1.22624233  | -7.50360956 | 0.00000000 |
| H | -1.22624233 | -7.50360956 | 0.00000000 |
| H | -2.49280056 | -5.36786870 | 0.00000000 |

level of theory m06l  
spin state IS

| Occup.          | alpha   | beta |
|-----------------|---------|------|
| A <sub>1g</sub> | 21.0 // | 20.0 |
| A <sub>2g</sub> | 11.0 // | 11.0 |
| B <sub>1g</sub> | 15.0 // | 15.0 |
| B <sub>2g</sub> | 14.0 // | 13.0 |
| E <sub>1g</sub> | 12.0 // | 11.0 |
| A <sub>1u</sub> | 2.0 //  | 2.0  |
| A <sub>2u</sub> | 6.0 //  | 6.0  |
| B <sub>1u</sub> | 2.0 //  | 2.0  |
| B <sub>2u</sub> | 3.0 //  | 3.0  |
| E <sub>1u</sub> | 60.0 // | 60.0 |

|    |             |             |            |
|----|-------------|-------------|------------|
| Mn | 0.00000000  | 0.00000000  | 0.00000000 |
| N  | 2.38069806  | 2.38069806  | 0.00000000 |
| N  | -2.38069806 | 2.38069806  | 0.00000000 |
| N  | -2.38069806 | -2.38069806 | 0.00000000 |
| N  | 2.38069806  | -2.38069806 | 0.00000000 |
| N  | 0.00000000  | 1.94489572  | 0.00000000 |
| C  | 1.12036772  | 2.75652398  | 0.00000000 |
| C  | 0.69885899  | 4.13029245  | 0.00000000 |
| C  | -0.69885899 | 4.13029245  | 0.00000000 |
| C  | -1.12036772 | 2.75652398  | 0.00000000 |
| N  | -1.94489572 | 0.00000000  | 0.00000000 |
| C  | -2.75652398 | 1.12036772  | 0.00000000 |
| C  | -4.13029245 | 0.69885899  | 0.00000000 |
| C  | -4.13029245 | -0.69885899 | 0.00000000 |
| C  | -2.75652398 | -1.12036772 | 0.00000000 |
| N  | 0.00000000  | -1.94489572 | 0.00000000 |
| C  | -1.12036772 | -2.75652398 | 0.00000000 |
| C  | -0.69885899 | -4.13029245 | 0.00000000 |
| C  | 0.69885899  | -4.13029245 | 0.00000000 |
| C  | 1.12036772  | -2.75652398 | 0.00000000 |
| N  | 1.94489572  | 0.00000000  | 0.00000000 |

|   |             |             |            |
|---|-------------|-------------|------------|
| C | 2.75652398  | -1.12036772 | 0.00000000 |
| C | 4.13029245  | -0.69885899 | 0.00000000 |
| C | 4.13029245  | 0.69885899  | 0.00000000 |
| C | 2.75652398  | 1.12036772  | 0.00000000 |
| C | -5.31942993 | -1.41465113 | 0.00000000 |
| C | -6.50254538 | -0.69984379 | 0.00000000 |
| C | -6.50254538 | 0.69984379  | 0.00000000 |
| C | -5.31942993 | 1.41465113  | 0.00000000 |
| C | -1.41465113 | 5.31942993  | 0.00000000 |
| C | -0.69984379 | 6.50254538  | 0.00000000 |
| C | 0.69984379  | 6.50254538  | 0.00000000 |
| C | 1.41465113  | 5.31942993  | 0.00000000 |
| C | 5.31942993  | 1.41465113  | 0.00000000 |
| C | 6.50254538  | 0.69984379  | 0.00000000 |
| C | 6.50254538  | -0.69984379 | 0.00000000 |
| C | 5.31942993  | -1.41465113 | 0.00000000 |
| C | 1.41465113  | -5.31942993 | 0.00000000 |
| C | 0.69984379  | -6.50254538 | 0.00000000 |
| C | -0.69984379 | -6.50254538 | 0.00000000 |
| C | -1.41465113 | -5.31942993 | 0.00000000 |
| H | -5.31041487 | -2.49448863 | 0.00000000 |
| H | -7.44587526 | -1.22678844 | 0.00000000 |
| H | -7.44587526 | 1.22678844  | 0.00000000 |
| H | -5.31041487 | 2.49448863  | 0.00000000 |
| H | -2.49448863 | 5.31041487  | 0.00000000 |
| H | -1.22678844 | 7.44587526  | 0.00000000 |
| H | 1.22678844  | 7.44587526  | 0.00000000 |
| H | 2.49448863  | 5.31041487  | 0.00000000 |
| H | 5.31041487  | 2.49448863  | 0.00000000 |
| H | 7.44587526  | 1.22678844  | 0.00000000 |
| H | 7.44587526  | -1.22678844 | 0.00000000 |
| H | 5.31041487  | -2.49448863 | 0.00000000 |
| H | 2.49448863  | -5.31041487 | 0.00000000 |
| H | 1.22678844  | -7.44587526 | 0.00000000 |
| H | -1.22678844 | -7.44587526 | 0.00000000 |
| H | -2.49448863 | -5.31041487 | 0.00000000 |

level of theory m06l  
spin state IS2

| Occup.          | alpha   | beta |
|-----------------|---------|------|
| A <sub>1g</sub> | 21.0 // | 20.0 |
| A <sub>2g</sub> | 11.0 // | 11.0 |
| B <sub>1g</sub> | 15.0 // | 15.0 |
| B <sub>2g</sub> | 14.0 // | 14.0 |
| E <sub>1g</sub> | 12.0 // | 10.0 |
| A <sub>1u</sub> | 2.0 //  | 2.0  |
| A <sub>2u</sub> | 6.0 //  | 6.0  |
| B <sub>1u</sub> | 2.0 //  | 2.0  |
| B <sub>2u</sub> | 3.0 //  | 3.0  |
| E <sub>1u</sub> | 60.0 // | 60.0 |

|    |            |            |            |
|----|------------|------------|------------|
| Mn | 0.00000000 | 0.00000000 | 0.00000000 |
| N  | 2.37822363 | 2.37822363 | 0.00000000 |

|   |             |             |            |
|---|-------------|-------------|------------|
| N | -2.37822363 | 2.37822363  | 0.00000000 |
| N | -2.37822363 | -2.37822363 | 0.00000000 |
| N | 2.37822363  | -2.37822363 | 0.00000000 |
| N | 0.00000000  | 1.95639792  | 0.00000000 |
| C | 1.11385302  | 2.75792524  | 0.00000000 |
| C | 0.69922042  | 4.14048176  | 0.00000000 |
| C | -0.69922042 | 4.14048176  | 0.00000000 |
| C | -1.11385302 | 2.75792524  | 0.00000000 |
| N | -1.95639792 | 0.00000000  | 0.00000000 |
| C | -2.75792524 | 1.11385302  | 0.00000000 |
| C | -4.14048176 | 0.69922042  | 0.00000000 |
| C | -4.14048176 | -0.69922042 | 0.00000000 |
| C | -2.75792524 | -1.11385302 | 0.00000000 |
| N | 0.00000000  | -1.95639792 | 0.00000000 |
| C | -1.11385302 | -2.75792524 | 0.00000000 |
| C | -0.69922042 | -4.14048176 | 0.00000000 |
| C | 0.69922042  | -4.14048176 | 0.00000000 |
| C | 1.11385302  | -2.75792524 | 0.00000000 |
| N | 1.95639792  | 0.00000000  | 0.00000000 |
| C | 2.75792524  | -1.11385302 | 0.00000000 |
| C | 4.14048176  | -0.69922042 | 0.00000000 |
| C | 4.14048176  | 0.69922042  | 0.00000000 |
| C | 2.75792524  | 1.11385302  | 0.00000000 |
| C | -5.32803171 | -1.41423413 | 0.00000000 |
| C | -6.51248227 | -0.69904738 | 0.00000000 |
| C | -6.51248227 | 0.69904738  | 0.00000000 |
| C | -5.32803171 | 1.41423413  | 0.00000000 |
| C | -1.41423413 | 5.32803171  | 0.00000000 |
| C | -0.69904738 | 6.51248227  | 0.00000000 |
| C | 0.69904738  | 6.51248227  | 0.00000000 |
| C | 1.41423413  | 5.32803171  | 0.00000000 |
| C | 5.32803171  | 1.41423413  | 0.00000000 |
| C | 6.51248227  | 0.69904738  | 0.00000000 |
| C | 6.51248227  | -0.69904738 | 0.00000000 |
| C | 5.32803171  | -1.41423413 | 0.00000000 |
| C | 1.41423413  | -5.32803171 | 0.00000000 |
| C | 0.69904738  | -6.51248227 | 0.00000000 |
| C | -0.69904738 | -6.51248227 | 0.00000000 |
| C | -1.41423413 | -5.32803171 | 0.00000000 |
| H | -5.31908226 | -2.49418012 | 0.00000000 |
| H | -7.45589311 | -1.22597192 | 0.00000000 |
| H | -7.45589311 | 1.22597192  | 0.00000000 |
| H | -5.31908226 | 2.49418012  | 0.00000000 |
| H | -2.49418012 | 5.31908226  | 0.00000000 |
| H | -1.22597192 | 7.45589311  | 0.00000000 |
| H | 1.22597192  | 7.45589311  | 0.00000000 |
| H | 2.49418012  | 5.31908226  | 0.00000000 |
| H | 5.31908226  | 2.49418012  | 0.00000000 |
| H | 7.45589311  | 1.22597192  | 0.00000000 |
| H | 7.45589311  | -1.22597192 | 0.00000000 |
| H | 5.31908226  | -2.49418012 | 0.00000000 |
| H | 2.49418012  | -5.31908226 | 0.00000000 |
| H | 1.22597192  | -7.45589311 | 0.00000000 |
| H | -1.22597192 | -7.45589311 | 0.00000000 |
| H | -2.49418012 | -5.31908226 | 0.00000000 |

level of theory m06l  
spin state IS3

| Occup.          | alpha   | beta |
|-----------------|---------|------|
| A <sub>1g</sub> | 21.0 // | 21.0 |
| A <sub>2g</sub> | 11.0 // | 11.0 |
| B <sub>1g</sub> | 15.0 // | 15.0 |
| B <sub>2g</sub> | 14.0 // | 13.0 |
| E <sub>1g</sub> | 12.0 // | 10.0 |
| A <sub>1u</sub> | 2.0 //  | 2.0  |
| A <sub>2u</sub> | 6.0 //  | 6.0  |
| B <sub>1u</sub> | 2.0 //  | 2.0  |
| B <sub>2u</sub> | 3.0 //  | 3.0  |
| E <sub>1u</sub> | 60.0 // | 60.0 |

|    |             |             |            |
|----|-------------|-------------|------------|
| Mn | 0.00000000  | 0.00000000  | 0.00000000 |
| N  | 2.37738012  | 2.37738012  | 0.00000000 |
| N  | -2.37738012 | 2.37738012  | 0.00000000 |
| N  | -2.37738012 | -2.37738012 | 0.00000000 |
| N  | 2.37738012  | -2.37738012 | 0.00000000 |
| N  | 0.00000000  | 1.95346522  | 0.00000000 |
| C  | 1.11414883  | 2.75453533  | 0.00000000 |
| C  | 0.69827319  | 4.13628327  | 0.00000000 |
| C  | -0.69827319 | 4.13628327  | 0.00000000 |
| C  | -1.11414883 | 2.75453533  | 0.00000000 |
| N  | -1.95346522 | 0.00000000  | 0.00000000 |
| C  | -2.75453533 | 1.11414883  | 0.00000000 |
| C  | -4.13628327 | 0.69827319  | 0.00000000 |
| C  | -4.13628327 | -0.69827319 | 0.00000000 |
| C  | -2.75453533 | -1.11414883 | 0.00000000 |
| N  | 0.00000000  | -1.95346522 | 0.00000000 |
| C  | -1.11414883 | -2.75453533 | 0.00000000 |
| C  | -0.69827319 | -4.13628327 | 0.00000000 |
| C  | 0.69827319  | -4.13628327 | 0.00000000 |
| C  | 1.11414883  | -2.75453533 | 0.00000000 |
| N  | 1.95346522  | 0.00000000  | 0.00000000 |
| C  | 2.75453533  | -1.11414883 | 0.00000000 |
| C  | 4.13628327  | -0.69827319 | 0.00000000 |
| C  | 4.13628327  | 0.69827319  | 0.00000000 |
| C  | 2.75453533  | 1.11414883  | 0.00000000 |
| C  | -5.32291668 | -1.41441458 | 0.00000000 |
| C  | -6.50724976 | -0.69891350 | 0.00000000 |
| C  | -6.50724976 | 0.69891350  | 0.00000000 |
| C  | -5.32291668 | 1.41441458  | 0.00000000 |
| C  | -1.41441458 | 5.32291668  | 0.00000000 |
| C  | -0.69891350 | 6.50724976  | 0.00000000 |
| C  | 0.69891350  | 6.50724976  | 0.00000000 |
| C  | 1.41441458  | 5.32291668  | 0.00000000 |
| C  | 5.32291668  | 1.41441458  | 0.00000000 |
| C  | 6.50724976  | 0.69891350  | 0.00000000 |
| C  | 6.50724976  | -0.69891350 | 0.00000000 |
| C  | 5.32291668  | -1.41441458 | 0.00000000 |
| C  | 1.41441458  | -5.32291668 | 0.00000000 |

|   |             |             |            |
|---|-------------|-------------|------------|
| C | 0.69891350  | -6.50724976 | 0.00000000 |
| C | -0.69891350 | -6.50724976 | 0.00000000 |
| C | -1.41441458 | -5.32291668 | 0.00000000 |
| H | -5.31477529 | -2.49417271 | 0.00000000 |
| H | -7.45047328 | -1.22598197 | 0.00000000 |
| H | -7.45047328 | 1.22598197  | 0.00000000 |
| H | -5.31477529 | 2.49417271  | 0.00000000 |
| H | -2.49417271 | 5.31477529  | 0.00000000 |
| H | -1.22598197 | 7.45047328  | 0.00000000 |
| H | 1.22598197  | 7.45047328  | 0.00000000 |
| H | 2.49417271  | 5.31477529  | 0.00000000 |
| H | 5.31477529  | 2.49417271  | 0.00000000 |
| H | 7.45047328  | 1.22598197  | 0.00000000 |
| H | 7.45047328  | -1.22598197 | 0.00000000 |
| H | 5.31477529  | -2.49417271 | 0.00000000 |
| H | 2.49417271  | -5.31477529 | 0.00000000 |
| H | 1.22598197  | -7.45047328 | 0.00000000 |
| H | -1.22598197 | -7.45047328 | 0.00000000 |
| H | -2.49417271 | -5.31477529 | 0.00000000 |

level of theory m06l  
spin state LS

| Occup.          | alpha   | beta |
|-----------------|---------|------|
| A <sub>1g</sub> | 21.0 // | 20.0 |
| A <sub>2g</sub> | 11.0 // | 11.0 |
| B <sub>1g</sub> | 15.0 // | 15.0 |
| B <sub>2g</sub> | 14.0 // | 13.0 |
| E <sub>1g</sub> | 12.0 // | 12.0 |
| A <sub>1u</sub> | 1.0 //  | 2.0  |
| A <sub>2u</sub> | 6.0 //  | 6.0  |
| B <sub>1u</sub> | 2.0 //  | 2.0  |
| B <sub>2u</sub> | 3.0 //  | 3.0  |
| E <sub>1u</sub> | 60.0 // | 60.0 |

|    |             |             |            |
|----|-------------|-------------|------------|
| Mn | 0.00000000  | 0.00000000  | 0.00000000 |
| N  | 2.38466636  | 2.38466636  | 0.00000000 |
| N  | -2.38466636 | 2.38466636  | 0.00000000 |
| N  | -2.38466636 | -2.38466636 | 0.00000000 |
| N  | 2.38466636  | -2.38466636 | 0.00000000 |
| N  | 0.00000000  | 1.93704697  | 0.00000000 |
| C  | 1.12047567  | 2.75333939  | 0.00000000 |
| C  | 0.69745350  | 4.13282774  | 0.00000000 |
| C  | -0.69745350 | 4.13282774  | 0.00000000 |
| C  | -1.12047567 | 2.75333939  | 0.00000000 |
| N  | -1.93704697 | 0.00000000  | 0.00000000 |
| C  | -2.75333939 | 1.12047567  | 0.00000000 |
| C  | -4.13282774 | 0.69745350  | 0.00000000 |
| C  | -4.13282774 | -0.69745350 | 0.00000000 |
| C  | -2.75333939 | -1.12047567 | 0.00000000 |
| N  | 0.00000000  | -1.93704697 | 0.00000000 |
| C  | -1.12047567 | -2.75333939 | 0.00000000 |
| C  | -0.69745350 | -4.13282774 | 0.00000000 |
| C  | 0.69745350  | -4.13282774 | 0.00000000 |

|   |             |             |            |
|---|-------------|-------------|------------|
| C | 1.12047567  | -2.75333939 | 0.00000000 |
| N | 1.93704697  | 0.00000000  | 0.00000000 |
| C | 2.75333939  | -1.12047567 | 0.00000000 |
| C | 4.13282774  | -0.69745350 | 0.00000000 |
| C | 4.13282774  | 0.69745350  | 0.00000000 |
| C | 2.75333939  | 1.12047567  | 0.00000000 |
| C | -5.31741906 | -1.41265454 | 0.00000000 |
| C | -6.50648140 | -0.69714552 | 0.00000000 |
| C | -6.50648140 | 0.69714552  | 0.00000000 |
| C | -5.31741906 | 1.41265454  | 0.00000000 |
| C | -1.41265454 | 5.31741906  | 0.00000000 |
| C | -0.69714552 | 6.50648140  | 0.00000000 |
| C | 0.69714552  | 6.50648140  | 0.00000000 |
| C | 1.41265454  | 5.31741906  | 0.00000000 |
| C | 5.31741906  | 1.41265454  | 0.00000000 |
| C | 6.50648140  | 0.69714552  | 0.00000000 |
| C | 6.50648140  | -0.69714552 | 0.00000000 |
| C | 5.31741906  | -1.41265454 | 0.00000000 |
| C | 1.41265454  | -5.31741906 | 0.00000000 |
| C | 0.69714552  | -6.50648140 | 0.00000000 |
| C | -0.69714552 | -6.50648140 | 0.00000000 |
| C | -1.41265454 | -5.31741906 | 0.00000000 |
| H | -5.30891412 | -2.49246241 | 0.00000000 |
| H | -7.44833170 | -1.22643125 | 0.00000000 |
| H | -7.44833170 | 1.22643125  | 0.00000000 |
| H | -5.30891412 | 2.49246241  | 0.00000000 |
| H | -2.49246241 | 5.30891412  | 0.00000000 |
| H | -1.22643125 | 7.44833170  | 0.00000000 |
| H | 1.22643125  | 7.44833170  | 0.00000000 |
| H | 2.49246241  | 5.30891412  | 0.00000000 |
| H | 5.30891412  | 2.49246241  | 0.00000000 |
| H | 7.44833170  | 1.22643125  | 0.00000000 |
| H | 7.44833170  | -1.22643125 | 0.00000000 |
| H | 5.30891412  | -2.49246241 | 0.00000000 |
| H | 2.49246241  | -5.30891412 | 0.00000000 |
| H | 1.22643125  | -7.44833170 | 0.00000000 |
| H | -1.22643125 | -7.44833170 | 0.00000000 |
| H | -2.49246241 | -5.30891412 | 0.00000000 |

level of theory pbe0  
spin state HS

| Occup.          | alpha   | beta |
|-----------------|---------|------|
| A <sub>1g</sub> | 21.0 // | 20.0 |
| A <sub>2g</sub> | 11.0 // | 11.0 |
| B <sub>1g</sub> | 16.0 // | 15.0 |
| B <sub>2g</sub> | 14.0 // | 13.0 |
| E <sub>1g</sub> | 12.0 // | 10.0 |
| A <sub>1u</sub> | 2.0 //  | 2.0  |
| A <sub>2u</sub> | 6.0 //  | 6.0  |
| B <sub>1u</sub> | 2.0 //  | 2.0  |
| B <sub>2u</sub> | 3.0 //  | 3.0  |
| E <sub>1u</sub> | 60.0 // | 60.0 |

|    |             |             |            |
|----|-------------|-------------|------------|
| Mn | 0.00000000  | 0.00000000  | 0.00000000 |
| N  | 2.37466809  | 2.37466809  | 0.00000000 |
| N  | -2.37466809 | 2.37466809  | 0.00000000 |
| N  | -2.37466809 | -2.37466809 | 0.00000000 |
| N  | 2.37466809  | -2.37466809 | 0.00000000 |
| N  | 0.00000000  | 2.02204765  | 0.00000000 |
| C  | 1.11811078  | 2.78764965  | 0.00000000 |
| C  | 0.70146942  | 4.18087704  | 0.00000000 |
| C  | -0.70146942 | 4.18087704  | 0.00000000 |
| C  | -1.11811078 | 2.78764965  | 0.00000000 |
| N  | -2.02204765 | 0.00000000  | 0.00000000 |
| C  | -2.78764965 | 1.11811078  | 0.00000000 |
| C  | -4.18087704 | 0.70146942  | 0.00000000 |
| C  | -4.18087704 | -0.70146942 | 0.00000000 |
| C  | -2.78764965 | -1.11811078 | 0.00000000 |
| N  | 0.00000000  | -2.02204765 | 0.00000000 |
| C  | -1.11811078 | -2.78764965 | 0.00000000 |
| C  | -0.70146942 | -4.18087704 | 0.00000000 |
| C  | 0.70146942  | -4.18087704 | 0.00000000 |
| C  | 1.11811078  | -2.78764965 | 0.00000000 |
| N  | 2.02204765  | 0.00000000  | 0.00000000 |
| C  | 2.78764965  | -1.11811078 | 0.00000000 |
| C  | 4.18087704  | -0.70146942 | 0.00000000 |
| C  | 4.18087704  | 0.70146942  | 0.00000000 |
| C  | 2.78764965  | 1.11811078  | 0.00000000 |
| C  | -5.36777557 | -1.41318848 | 0.00000000 |
| C  | -6.55161016 | -0.69790118 | 0.00000000 |
| C  | -6.55161016 | 0.69790118  | 0.00000000 |
| C  | -5.36777557 | 1.41318848  | 0.00000000 |
| C  | -1.41318848 | 5.36777557  | 0.00000000 |
| C  | -0.69790118 | 6.55161016  | 0.00000000 |
| C  | 0.69790118  | 6.55161016  | 0.00000000 |
| C  | 1.41318848  | 5.36777557  | 0.00000000 |
| C  | 5.36777557  | 1.41318848  | 0.00000000 |
| C  | 6.55161016  | 0.69790118  | 0.00000000 |
| C  | 6.55161016  | -0.69790118 | 0.00000000 |
| C  | 5.36777557  | -1.41318848 | 0.00000000 |
| C  | 1.41318848  | -5.36777557 | 0.00000000 |
| C  | 0.69790118  | -6.55161016 | 0.00000000 |
| C  | -0.69790118 | -6.55161016 | 0.00000000 |
| C  | -1.41318848 | -5.36777557 | 0.00000000 |
| H  | -5.36143549 | -2.49372609 | 0.00000000 |
| H  | -7.49493369 | -1.22666726 | 0.00000000 |
| H  | -7.49493369 | 1.22666726  | 0.00000000 |
| H  | -5.36143549 | 2.49372609  | 0.00000000 |
| H  | -2.49372609 | 5.36143549  | 0.00000000 |
| H  | -1.22666726 | 7.49493369  | 0.00000000 |
| H  | 1.22666726  | 7.49493369  | 0.00000000 |
| H  | 2.49372609  | 5.36143549  | 0.00000000 |
| H  | 5.36143549  | 2.49372609  | 0.00000000 |
| H  | 7.49493369  | 1.22666726  | 0.00000000 |
| H  | 7.49493369  | -1.22666726 | 0.00000000 |
| H  | 5.36143549  | -2.49372609 | 0.00000000 |
| H  | 2.49372609  | -5.36143549 | 0.00000000 |
| H  | 1.22666726  | -7.49493369 | 0.00000000 |

|   |             |             |            |
|---|-------------|-------------|------------|
| H | -1.22666726 | -7.49493369 | 0.00000000 |
| H | -2.49372609 | -5.36143549 | 0.00000000 |

level of theory pbe0  
spin state IS

| Occup.          | alpha |    | beta |
|-----------------|-------|----|------|
| A <sub>1g</sub> | 21.0  | // | 20.0 |
| A <sub>2g</sub> | 11.0  | // | 11.0 |
| B <sub>1g</sub> | 15.0  | // | 15.0 |
| B <sub>2g</sub> | 14.0  | // | 13.0 |
| E <sub>1g</sub> | 12.0  | // | 11.0 |
| A <sub>1u</sub> | 2.0   | // | 2.0  |
| A <sub>2u</sub> | 6.0   | // | 6.0  |
| B <sub>1u</sub> | 2.0   | // | 2.0  |
| B <sub>2u</sub> | 3.0   | // | 3.0  |
| E <sub>1u</sub> | 60.0  | // | 60.0 |

|    |             |             |            |
|----|-------------|-------------|------------|
| Mn | 0.00000000  | 0.00000000  | 0.00000000 |
| N  | 2.36732416  | 2.36732416  | 0.00000000 |
| N  | -2.36732416 | 2.36732416  | 0.00000000 |
| N  | -2.36732416 | -2.36732416 | 0.00000000 |
| N  | 2.36732416  | -2.36732416 | 0.00000000 |
| N  | 0.00000000  | 1.93577377  | 0.00000000 |
| C  | 1.11445628  | 2.74320511  | 0.00000000 |
| C  | 0.69782339  | 4.11892149  | 0.00000000 |
| C  | -0.69782339 | 4.11892149  | 0.00000000 |
| C  | -1.11445628 | 2.74320511  | 0.00000000 |
| N  | -1.93577377 | 0.00000000  | 0.00000000 |
| C  | -2.74320511 | 1.11445628  | 0.00000000 |
| C  | -4.11892149 | 0.69782339  | 0.00000000 |
| C  | -4.11892149 | -0.69782339 | 0.00000000 |
| C  | -2.74320511 | -1.11445628 | 0.00000000 |
| N  | 0.00000000  | -1.93577377 | 0.00000000 |
| C  | -1.11445628 | -2.74320511 | 0.00000000 |
| C  | -0.69782339 | -4.11892149 | 0.00000000 |
| C  | 0.69782339  | -4.11892149 | 0.00000000 |
| C  | 1.11445628  | -2.74320511 | 0.00000000 |
| N  | 1.93577377  | 0.00000000  | 0.00000000 |
| C  | 2.74320511  | -1.11445628 | 0.00000000 |
| C  | 4.11892149  | -0.69782339 | 0.00000000 |
| C  | 4.11892149  | 0.69782339  | 0.00000000 |
| C  | 2.74320511  | 1.11445628  | 0.00000000 |
| C  | -5.30693077 | -1.41520041 | 0.00000000 |
| C  | -6.48707752 | -0.70016341 | 0.00000000 |
| C  | -6.48707752 | 0.70016341  | 0.00000000 |
| C  | -5.30693077 | 1.41520041  | 0.00000000 |
| C  | -1.41520041 | 5.30693077  | 0.00000000 |
| C  | -0.70016341 | 6.48707752  | 0.00000000 |
| C  | 0.70016341  | 6.48707752  | 0.00000000 |
| C  | 1.41520041  | 5.30693077  | 0.00000000 |
| C  | 5.30693077  | 1.41520041  | 0.00000000 |
| C  | 6.48707752  | 0.70016341  | 0.00000000 |
| C  | 6.48707752  | -0.70016341 | 0.00000000 |

|   |             |             |            |
|---|-------------|-------------|------------|
| C | 5.30693077  | -1.41520041 | 0.00000000 |
| C | 1.41520041  | -5.30693077 | 0.00000000 |
| C | 0.70016341  | -6.48707752 | 0.00000000 |
| C | -0.70016341 | -6.48707752 | 0.00000000 |
| C | -1.41520041 | -5.30693077 | 0.00000000 |
| H | -5.29872164 | -2.49539776 | 0.00000000 |
| H | -7.43102760 | -1.22760972 | 0.00000000 |
| H | -7.43102760 | 1.22760972  | 0.00000000 |
| H | -5.29872164 | 2.49539776  | 0.00000000 |
| H | -2.49539776 | 5.29872164  | 0.00000000 |
| H | -1.22760972 | 7.43102760  | 0.00000000 |
| H | 1.22760972  | 7.43102760  | 0.00000000 |
| H | 2.49539776  | 5.29872164  | 0.00000000 |
| H | 5.29872164  | 2.49539776  | 0.00000000 |
| H | 7.43102760  | 1.22760972  | 0.00000000 |
| H | 7.43102760  | -1.22760972 | 0.00000000 |
| H | 5.29872164  | -2.49539776 | 0.00000000 |
| H | 2.49539776  | -5.29872164 | 0.00000000 |
| H | 1.22760972  | -7.43102760 | 0.00000000 |
| H | -1.22760972 | -7.43102760 | 0.00000000 |
| H | -2.49539776 | -5.29872164 | 0.00000000 |

level of theory pbe0  
spin state IS2

| Occup.          | alpha   | beta |
|-----------------|---------|------|
| A <sub>1g</sub> | 21.0 // | 20.0 |
| A <sub>2g</sub> | 11.0 // | 11.0 |
| B <sub>1g</sub> | 15.0 // | 15.0 |
| B <sub>2g</sub> | 14.0 // | 14.0 |
| E <sub>1g</sub> | 12.0 // | 10.0 |
| A <sub>1u</sub> | 2.0 //  | 2.0  |
| A <sub>2u</sub> | 6.0 //  | 6.0  |
| B <sub>1u</sub> | 2.0 //  | 2.0  |
| B <sub>2u</sub> | 3.0 //  | 3.0  |
| E <sub>1u</sub> | 60.0 // | 60.0 |

|    |             |             |            |
|----|-------------|-------------|------------|
| Mn | 0.00000000  | 0.00000000  | 0.00000000 |
| N  | 2.36397077  | 2.36397077  | 0.00000000 |
| N  | -2.36397077 | 2.36397077  | 0.00000000 |
| N  | -2.36397077 | -2.36397077 | 0.00000000 |
| N  | 2.36397077  | -2.36397077 | 0.00000000 |
| N  | 0.00000000  | 1.95414892  | 0.00000000 |
| C  | 1.10717004  | 2.74718188  | 0.00000000 |
| C  | 0.69796098  | 4.13461689  | 0.00000000 |
| C  | -0.69796098 | 4.13461689  | 0.00000000 |
| C  | -1.10717004 | 2.74718188  | 0.00000000 |
| N  | -1.95414892 | 0.00000000  | 0.00000000 |
| C  | -2.74718188 | 1.10717004  | 0.00000000 |
| C  | -4.13461689 | 0.69796098  | 0.00000000 |
| C  | -4.13461689 | -0.69796098 | 0.00000000 |
| C  | -2.74718188 | -1.10717004 | 0.00000000 |
| N  | 0.00000000  | -1.95414892 | 0.00000000 |
| C  | -1.10717004 | -2.74718188 | 0.00000000 |

|   |             |             |            |
|---|-------------|-------------|------------|
| C | -0.69796098 | -4.13461689 | 0.00000000 |
| C | 0.69796098  | -4.13461689 | 0.00000000 |
| C | 1.10717004  | -2.74718188 | 0.00000000 |
| N | 1.95414892  | 0.00000000  | 0.00000000 |
| C | 2.74718188  | -1.10717004 | 0.00000000 |
| C | 4.13461689  | -0.69796098 | 0.00000000 |
| C | 4.13461689  | 0.69796098  | 0.00000000 |
| C | 2.74718188  | 1.10717004  | 0.00000000 |
| C | -5.32013797 | -1.41457863 | 0.00000000 |
| C | -6.50204530 | -0.69894154 | 0.00000000 |
| C | -6.50204530 | 0.69894154  | 0.00000000 |
| C | -5.32013797 | 1.41457863  | 0.00000000 |
| C | -1.41457863 | 5.32013797  | 0.00000000 |
| C | -0.69894154 | 6.50204530  | 0.00000000 |
| C | 0.69894154  | 6.50204530  | 0.00000000 |
| C | 1.41457863  | 5.32013797  | 0.00000000 |
| C | 5.32013797  | 1.41457863  | 0.00000000 |
| C | 6.50204530  | 0.69894154  | 0.00000000 |
| C | 6.50204530  | -0.69894154 | 0.00000000 |
| C | 5.32013797  | -1.41457863 | 0.00000000 |
| C | 1.41457863  | -5.32013797 | 0.00000000 |
| C | 0.69894154  | -6.50204530 | 0.00000000 |
| C | -0.69894154 | -6.50204530 | 0.00000000 |
| C | -1.41457863 | -5.32013797 | 0.00000000 |
| H | -5.31162192 | -2.49479026 | 0.00000000 |
| H | -7.44599432 | -1.22623333 | 0.00000000 |
| H | -7.44599432 | 1.22623333  | 0.00000000 |
| H | -5.31162192 | 2.49479026  | 0.00000000 |
| H | -2.49479026 | 5.31162192  | 0.00000000 |
| H | -1.22623333 | 7.44599432  | 0.00000000 |
| H | 1.22623333  | 7.44599432  | 0.00000000 |
| H | 2.49479026  | 5.31162192  | 0.00000000 |
| H | 5.31162192  | 2.49479026  | 0.00000000 |
| H | 7.44599432  | 1.22623333  | 0.00000000 |
| H | 7.44599432  | -1.22623333 | 0.00000000 |
| H | 5.31162192  | -2.49479026 | 0.00000000 |
| H | 2.49479026  | -5.31162192 | 0.00000000 |
| H | 1.22623333  | -7.44599432 | 0.00000000 |
| H | -1.22623333 | -7.44599432 | 0.00000000 |
| H | -2.49479026 | -5.31162192 | 0.00000000 |

level of theory pbe0  
spin state IS3

| Occup.          | alpha   | beta |
|-----------------|---------|------|
| A <sub>1g</sub> | 21.0 // | 21.0 |
| A <sub>2g</sub> | 11.0 // | 11.0 |
| B <sub>1g</sub> | 15.0 // | 15.0 |
| B <sub>2g</sub> | 14.0 // | 13.0 |
| E <sub>1g</sub> | 12.0 // | 10.0 |
| A <sub>1u</sub> | 2.0 //  | 2.0  |
| A <sub>2u</sub> | 6.0 //  | 6.0  |
| B <sub>1u</sub> | 2.0 //  | 2.0  |
| B <sub>2u</sub> | 3.0 //  | 3.0  |
| E <sub>1u</sub> | 60.0 // | 60.0 |

|    |             |             |            |
|----|-------------|-------------|------------|
| Mn | 0.00000000  | 0.00000000  | 0.00000000 |
| N  | 2.36321510  | 2.36321510  | 0.00000000 |
| N  | -2.36321510 | 2.36321510  | 0.00000000 |
| N  | -2.36321510 | -2.36321510 | 0.00000000 |
| N  | 2.36321510  | -2.36321510 | 0.00000000 |
| N  | 0.00000000  | 1.95165861  | 0.00000000 |
| C  | 1.10757804  | 2.74428146  | 0.00000000 |
| C  | 0.69738470  | 4.13101902  | 0.00000000 |
| C  | -0.69738470 | 4.13101902  | 0.00000000 |
| C  | -1.10757804 | 2.74428146  | 0.00000000 |
| N  | -1.95165861 | 0.00000000  | 0.00000000 |
| C  | -2.74428146 | 1.10757804  | 0.00000000 |
| C  | -4.13101902 | 0.69738470  | 0.00000000 |
| C  | -4.13101902 | -0.69738470 | 0.00000000 |
| C  | -2.74428146 | -1.10757804 | 0.00000000 |
| N  | 0.00000000  | -1.95165861 | 0.00000000 |
| C  | -1.10757804 | -2.74428146 | 0.00000000 |
| C  | -0.69738470 | -4.13101902 | 0.00000000 |
| C  | 0.69738470  | -4.13101902 | 0.00000000 |
| C  | 1.10757804  | -2.74428146 | 0.00000000 |
| N  | 1.95165861  | 0.00000000  | 0.00000000 |
| C  | 2.74428146  | -1.10757804 | 0.00000000 |
| C  | 4.13101902  | -0.69738470 | 0.00000000 |
| C  | 4.13101902  | 0.69738470  | 0.00000000 |
| C  | 2.74428146  | 1.10757804  | 0.00000000 |
| C  | -5.31581195 | -1.41484322 | 0.00000000 |
| C  | -6.49775738 | -0.69889180 | 0.00000000 |
| C  | -6.49775738 | 0.69889180  | 0.00000000 |
| C  | -5.31581195 | 1.41484322  | 0.00000000 |
| C  | -1.41484322 | 5.31581195  | 0.00000000 |
| C  | -0.69889180 | 6.49775738  | 0.00000000 |
| C  | 0.69889180  | 6.49775738  | 0.00000000 |
| C  | 1.41484322  | 5.31581195  | 0.00000000 |
| C  | 5.31581195  | 1.41484322  | 0.00000000 |
| C  | 6.49775738  | 0.69889180  | 0.00000000 |
| C  | 6.49775738  | -0.69889180 | 0.00000000 |
| C  | 5.31581195  | -1.41484322 | 0.00000000 |
| C  | 1.41484322  | -5.31581195 | 0.00000000 |
| C  | 0.69889180  | -6.49775738 | 0.00000000 |
| C  | -0.69889180 | -6.49775738 | 0.00000000 |
| C  | -1.41484322 | -5.31581195 | 0.00000000 |
| H  | -5.30750228 | -2.49506702 | 0.00000000 |
| H  | -7.44158998 | -1.22649210 | 0.00000000 |
| H  | -7.44158998 | 1.22649210  | 0.00000000 |
| H  | -5.30750228 | 2.49506702  | 0.00000000 |
| H  | -2.49506702 | 5.30750228  | 0.00000000 |
| H  | -1.22649210 | 7.44158998  | 0.00000000 |
| H  | 1.22649210  | 7.44158998  | 0.00000000 |
| H  | 2.49506702  | 5.30750228  | 0.00000000 |
| H  | 5.30750228  | 2.49506702  | 0.00000000 |
| H  | 7.44158998  | 1.22649210  | 0.00000000 |
| H  | 7.44158998  | -1.22649210 | 0.00000000 |
| H  | 5.30750228  | -2.49506702 | 0.00000000 |

|   |             |             |            |
|---|-------------|-------------|------------|
| H | 2.49506702  | -5.30750228 | 0.00000000 |
| H | 1.22649210  | -7.44158998 | 0.00000000 |
| H | -1.22649210 | -7.44158998 | 0.00000000 |
| H | -2.49506702 | -5.30750228 | 0.00000000 |

level of theory pbe0  
spin state LS

| Occup.          | alpha   | beta |
|-----------------|---------|------|
| A <sub>1g</sub> | 20.0 // | 21.0 |
| A <sub>2g</sub> | 11.0 // | 11.0 |
| B <sub>1g</sub> | 15.0 // | 15.0 |
| B <sub>2g</sub> | 14.0 // | 14.0 |
| E <sub>1g</sub> | 12.0 // | 10.0 |
| A <sub>1u</sub> | 2.0 //  | 2.0  |
| A <sub>2u</sub> | 6.0 //  | 6.0  |
| B <sub>1u</sub> | 2.0 //  | 2.0  |
| B <sub>2u</sub> | 3.0 //  | 3.0  |
| E <sub>1u</sub> | 60.0 // | 60.0 |

|    |             |             |            |
|----|-------------|-------------|------------|
| Mn | 0.00000000  | 0.00000000  | 0.00000000 |
| N  | 2.37045266  | 2.37045266  | 0.00000000 |
| N  | -2.37045266 | 2.37045266  | 0.00000000 |
| N  | -2.37045266 | -2.37045266 | 0.00000000 |
| N  | 2.37045266  | -2.37045266 | 0.00000000 |
| N  | 0.00000000  | 1.94749240  | 0.00000000 |
| C  | 1.10976936  | 2.74366761  | 0.00000000 |
| C  | 0.69715716  | 4.13279917  | 0.00000000 |
| C  | -0.69715716 | 4.13279917  | 0.00000000 |
| C  | -1.10976936 | 2.74366761  | 0.00000000 |
| N  | -1.94749240 | 0.00000000  | 0.00000000 |
| C  | -2.74366761 | 1.10976936  | 0.00000000 |
| C  | -4.13279917 | 0.69715716  | 0.00000000 |
| C  | -4.13279917 | -0.69715716 | 0.00000000 |
| C  | -2.74366761 | -1.10976936 | 0.00000000 |
| N  | 0.00000000  | -1.94749240 | 0.00000000 |
| C  | -1.10976936 | -2.74366761 | 0.00000000 |
| C  | -0.69715716 | -4.13279917 | 0.00000000 |
| C  | 0.69715716  | -4.13279917 | 0.00000000 |
| C  | 1.10976936  | -2.74366761 | 0.00000000 |
| N  | 1.94749240  | 0.00000000  | 0.00000000 |
| C  | 2.74366761  | -1.10976936 | 0.00000000 |
| C  | 4.13279917  | -0.69715716 | 0.00000000 |
| C  | 4.13279917  | 0.69715716  | 0.00000000 |
| C  | 2.74366761  | 1.10976936  | 0.00000000 |
| C  | -5.31417944 | -1.41360335 | 0.00000000 |
| C  | -6.50102346 | -0.69700952 | 0.00000000 |
| C  | -6.50102346 | 0.69700952  | 0.00000000 |
| C  | -5.31417944 | 1.41360335  | 0.00000000 |
| C  | -1.41360335 | 5.31417944  | 0.00000000 |
| C  | -0.69700952 | 6.50102346  | 0.00000000 |
| C  | 0.69700952  | 6.50102346  | 0.00000000 |
| C  | 1.41360335  | 5.31417944  | 0.00000000 |
| C  | 5.31417944  | 1.41360335  | 0.00000000 |

|   |             |             |            |
|---|-------------|-------------|------------|
| C | 6.50102346  | 0.69700952  | 0.00000000 |
| C | 6.50102346  | -0.69700952 | 0.00000000 |
| C | 5.31417944  | -1.41360335 | 0.00000000 |
| C | 1.41360335  | -5.31417944 | 0.00000000 |
| C | 0.69700952  | -6.50102346 | 0.00000000 |
| C | -0.69700952 | -6.50102346 | 0.00000000 |
| C | -1.41360335 | -5.31417944 | 0.00000000 |
| H | -5.30485586 | -2.49379911 | 0.00000000 |
| H | -7.44394323 | -1.22589254 | 0.00000000 |
| H | -7.44394323 | 1.22589254  | 0.00000000 |
| H | -5.30485586 | 2.49379911  | 0.00000000 |
| H | -2.49379911 | 5.30485586  | 0.00000000 |
| H | -1.22589254 | 7.44394323  | 0.00000000 |
| H | 1.22589254  | 7.44394323  | 0.00000000 |
| H | 2.49379911  | 5.30485586  | 0.00000000 |
| H | 5.30485586  | 2.49379911  | 0.00000000 |
| H | 7.44394323  | 1.22589254  | 0.00000000 |
| H | 7.44394323  | -1.22589254 | 0.00000000 |
| H | 5.30485586  | -2.49379911 | 0.00000000 |
| H | 2.49379911  | -5.30485586 | 0.00000000 |
| H | 1.22589254  | -7.44394323 | 0.00000000 |
| H | -1.22589254 | -7.44394323 | 0.00000000 |
| H | -2.49379911 | -5.30485586 | 0.00000000 |

level of theory tpssh  
spin state HS

| Occup.          | alpha   | beta |
|-----------------|---------|------|
| A <sub>1g</sub> | 21.0 // | 20.0 |
| A <sub>2g</sub> | 11.0 // | 11.0 |
| B <sub>1g</sub> | 16.0 // | 15.0 |
| B <sub>2g</sub> | 14.0 // | 13.0 |
| E <sub>1g</sub> | 12.0 // | 10.0 |
| A <sub>1u</sub> | 2.0 //  | 2.0  |
| A <sub>2u</sub> | 6.0 //  | 6.0  |
| B <sub>1u</sub> | 2.0 //  | 2.0  |
| B <sub>2u</sub> | 3.0 //  | 3.0  |
| E <sub>1u</sub> | 60.0 // | 60.0 |

|    |             |             |            |
|----|-------------|-------------|------------|
| Mn | 0.00000000  | 0.00000000  | 0.00000000 |
| N  | 2.39003275  | 2.39003275  | 0.00000000 |
| N  | -2.39003275 | 2.39003275  | 0.00000000 |
| N  | -2.39003275 | -2.39003275 | 0.00000000 |
| N  | 2.39003275  | -2.39003275 | 0.00000000 |
| N  | 0.00000000  | 2.02573390  | 0.00000000 |
| C  | 1.12458473  | 2.80138127  | 0.00000000 |
| C  | 0.70452860  | 4.19634224  | 0.00000000 |
| C  | -0.70452860 | 4.19634224  | 0.00000000 |
| C  | -1.12458473 | 2.80138127  | 0.00000000 |
| N  | -2.02573390 | 0.00000000  | 0.00000000 |
| C  | -2.80138127 | 1.12458473  | 0.00000000 |
| C  | -4.19634224 | 0.70452860  | 0.00000000 |
| C  | -4.19634224 | -0.70452860 | 0.00000000 |
| C  | -2.80138127 | -1.12458473 | 0.00000000 |

|   |             |             |            |
|---|-------------|-------------|------------|
| N | 0.00000000  | -2.02573390 | 0.00000000 |
| C | -1.12458473 | -2.80138127 | 0.00000000 |
| C | -0.70452860 | -4.19634224 | 0.00000000 |
| C | 0.70452860  | -4.19634224 | 0.00000000 |
| C | 1.12458473  | -2.80138127 | 0.00000000 |
| N | 2.02573390  | 0.00000000  | 0.00000000 |
| C | 2.80138127  | -1.12458473 | 0.00000000 |
| C | 4.19634224  | -0.70452860 | 0.00000000 |
| C | 4.19634224  | 0.70452860  | 0.00000000 |
| C | 2.80138127  | 1.12458473  | 0.00000000 |
| C | -5.38855530 | -1.41880358 | 0.00000000 |
| C | -6.57754567 | -0.70089685 | 0.00000000 |
| C | -6.57754567 | 0.70089685  | 0.00000000 |
| C | -5.38855530 | 1.41880358  | 0.00000000 |
| C | -1.41880358 | 5.38855530  | 0.00000000 |
| C | -0.70089685 | 6.57754567  | 0.00000000 |
| C | 0.70089685  | 6.57754567  | 0.00000000 |
| C | 1.41880358  | 5.38855530  | 0.00000000 |
| C | 5.38855530  | 1.41880358  | 0.00000000 |
| C | 6.57754567  | 0.70089685  | 0.00000000 |
| C | 6.57754567  | -0.70089685 | 0.00000000 |
| C | 5.38855530  | -1.41880358 | 0.00000000 |
| C | 1.41880358  | -5.38855530 | 0.00000000 |
| C | 0.70089685  | -6.57754567 | 0.00000000 |
| C | -0.70089685 | -6.57754567 | 0.00000000 |
| C | -1.41880358 | -5.38855530 | 0.00000000 |
| H | -5.38277774 | -2.50042653 | 0.00000000 |
| H | -7.52233555 | -1.23027572 | 0.00000000 |
| H | -7.52233555 | 1.23027572  | 0.00000000 |
| H | -5.38277774 | 2.50042653  | 0.00000000 |
| H | -2.50042653 | 5.38277774  | 0.00000000 |
| H | -1.23027572 | 7.52233555  | 0.00000000 |
| H | 1.23027572  | 7.52233555  | 0.00000000 |
| H | 2.50042653  | 5.38277774  | 0.00000000 |
| H | 5.38277774  | 2.50042653  | 0.00000000 |
| H | 7.52233555  | 1.23027572  | 0.00000000 |
| H | 7.52233555  | -1.23027572 | 0.00000000 |
| H | 5.38277774  | -2.50042653 | 0.00000000 |
| H | 2.50042653  | -5.38277774 | 0.00000000 |
| H | 1.23027572  | -7.52233555 | 0.00000000 |
| H | -1.23027572 | -7.52233555 | 0.00000000 |
| H | -2.50042653 | -5.38277774 | 0.00000000 |

level of theory tpssh  
spin state IS

| Occup.          | alpha   | beta |
|-----------------|---------|------|
| A <sub>1g</sub> | 21.0 // | 20.0 |
| A <sub>2g</sub> | 11.0 // | 11.0 |
| B <sub>1g</sub> | 15.0 // | 15.0 |
| B <sub>2g</sub> | 14.0 // | 13.0 |
| E <sub>1g</sub> | 12.0 // | 11.0 |
| A <sub>1u</sub> | 2.0 //  | 2.0  |
| A <sub>2u</sub> | 6.0 //  | 6.0  |
| B <sub>1u</sub> | 2.0 //  | 2.0  |



|                 |             |             |            |
|-----------------|-------------|-------------|------------|
| B <sub>2u</sub> | 3.0         | //          | 3.0        |
| E <sub>1u</sub> | 60.0        | //          | 60.0       |
| Mn              | 0.00000000  | 0.00000000  | 0.00000000 |
| N               | 2.38054301  | 2.38054301  | 0.00000000 |
| N               | -2.38054301 | 2.38054301  | 0.00000000 |
| N               | -2.38054301 | -2.38054301 | 0.00000000 |
| N               | 2.38054301  | -2.38054301 | 0.00000000 |
| N               | 0.00000000  | 1.94231916  | 0.00000000 |
| C               | 1.11970466  | 2.75744421  | 0.00000000 |
| C               | 0.70057035  | 4.13731675  | 0.00000000 |
| C               | -0.70057035 | 4.13731675  | 0.00000000 |
| C               | -1.11970466 | 2.75744421  | 0.00000000 |
| N               | -1.94231916 | 0.00000000  | 0.00000000 |
| C               | -2.75744421 | 1.11970466  | 0.00000000 |
| C               | -4.13731675 | 0.70057035  | 0.00000000 |
| C               | -4.13731675 | -0.70057035 | 0.00000000 |
| C               | -2.75744421 | -1.11970466 | 0.00000000 |
| N               | 0.00000000  | -1.94231916 | 0.00000000 |
| C               | -1.11970466 | -2.75744421 | 0.00000000 |
| C               | -0.70057035 | -4.13731675 | 0.00000000 |
| C               | 0.70057035  | -4.13731675 | 0.00000000 |
| C               | 1.11970466  | -2.75744421 | 0.00000000 |
| N               | 1.94231916  | 0.00000000  | 0.00000000 |
| C               | 2.75744421  | -1.11970466 | 0.00000000 |
| C               | 4.13731675  | -0.70057035 | 0.00000000 |
| C               | 4.13731675  | 0.70057035  | 0.00000000 |
| C               | 2.75744421  | 1.11970466  | 0.00000000 |
| C               | -5.32958802 | -1.42065517 | 0.00000000 |
| C               | -6.51541602 | -0.70275585 | 0.00000000 |
| C               | -6.51541602 | 0.70275585  | 0.00000000 |
| C               | -5.32958802 | 1.42065517  | 0.00000000 |
| C               | -1.42065517 | 5.32958802  | 0.00000000 |
| C               | -0.70275585 | 6.51541602  | 0.00000000 |
| C               | 0.70275585  | 6.51541602  | 0.00000000 |
| C               | 1.42065517  | 5.32958802  | 0.00000000 |
| C               | 5.32958802  | 1.42065517  | 0.00000000 |
| C               | 6.51541602  | 0.70275585  | 0.00000000 |
| C               | 6.51541602  | -0.70275585 | 0.00000000 |
| C               | 5.32958802  | -1.42065517 | 0.00000000 |
| C               | 1.42065517  | -5.32958802 | 0.00000000 |
| C               | 0.70275585  | -6.51541602 | 0.00000000 |
| C               | -0.70275585 | -6.51541602 | 0.00000000 |
| C               | -1.42065517 | -5.32958802 | 0.00000000 |
| H               | -5.32152442 | -2.50211990 | 0.00000000 |
| H               | -7.46101502 | -1.23076362 | 0.00000000 |
| H               | -7.46101502 | 1.23076362  | 0.00000000 |
| H               | -5.32152442 | 2.50211990  | 0.00000000 |
| H               | -2.50211990 | 5.32152442  | 0.00000000 |
| H               | -1.23076362 | 7.46101502  | 0.00000000 |
| H               | 1.23076362  | 7.46101502  | 0.00000000 |
| H               | 2.50211990  | 5.32152442  | 0.00000000 |
| H               | 5.32152442  | 2.50211990  | 0.00000000 |
| H               | 7.46101502  | 1.23076362  | 0.00000000 |

|   |             |             |            |
|---|-------------|-------------|------------|
| H | 7.46101502  | -1.23076362 | 0.00000000 |
| H | 5.32152442  | -2.50211990 | 0.00000000 |
| H | 2.50211990  | -5.32152442 | 0.00000000 |
| H | 1.23076362  | -7.46101502 | 0.00000000 |
| H | -1.23076362 | -7.46101502 | 0.00000000 |
| H | -2.50211990 | -5.32152442 | 0.00000000 |

level of theory tpssh  
spin state IS2

| Occup.          | alpha |    | beta |
|-----------------|-------|----|------|
| A <sub>1g</sub> | 21.0  | // | 20.0 |
| A <sub>2g</sub> | 11.0  | // | 11.0 |
| B <sub>1g</sub> | 15.0  | // | 15.0 |
| B <sub>2g</sub> | 14.0  | // | 14.0 |
| E <sub>1g</sub> | 12.0  | // | 10.0 |
| A <sub>1u</sub> | 2.0   | // | 2.0  |
| A <sub>2u</sub> | 6.0   | // | 6.0  |
| B <sub>1u</sub> | 2.0   | // | 2.0  |
| B <sub>2u</sub> | 3.0   | // | 3.0  |
| E <sub>1u</sub> | 60.0  | // | 60.0 |

|    |             |             |            |
|----|-------------|-------------|------------|
| Mn | 0.00000000  | 0.00000000  | 0.00000000 |
| N  | 2.37843530  | 2.37843530  | 0.00000000 |
| N  | -2.37843530 | 2.37843530  | 0.00000000 |
| N  | -2.37843530 | -2.37843530 | 0.00000000 |
| N  | 2.37843530  | -2.37843530 | 0.00000000 |
| N  | 0.00000000  | 1.95659583  | 0.00000000 |
| C  | 1.11357732  | 2.76004036  | 0.00000000 |
| C  | 0.70097517  | 4.14911635  | 0.00000000 |
| C  | -0.70097517 | 4.14911635  | 0.00000000 |
| C  | -1.11357732 | 2.76004036  | 0.00000000 |
| N  | -1.95659583 | 0.00000000  | 0.00000000 |
| C  | -2.76004036 | 1.11357732  | 0.00000000 |
| C  | -4.14911635 | 0.70097517  | 0.00000000 |
| C  | -4.14911635 | -0.70097517 | 0.00000000 |
| C  | -2.76004036 | -1.11357732 | 0.00000000 |
| N  | 0.00000000  | -1.95659583 | 0.00000000 |
| C  | -1.11357732 | -2.76004036 | 0.00000000 |
| C  | -0.70097517 | -4.14911635 | 0.00000000 |
| C  | 0.70097517  | -4.14911635 | 0.00000000 |
| C  | 1.11357732  | -2.76004036 | 0.00000000 |
| N  | 1.95659583  | 0.00000000  | 0.00000000 |
| C  | 2.76004036  | -1.11357732 | 0.00000000 |
| C  | 4.14911635  | -0.70097517 | 0.00000000 |
| C  | 4.14911635  | 0.70097517  | 0.00000000 |
| C  | 2.76004036  | 1.11357732  | 0.00000000 |
| C  | -5.33975457 | -1.42026040 | 0.00000000 |
| C  | -6.52690129 | -0.70190652 | 0.00000000 |
| C  | -6.52690129 | 0.70190652  | 0.00000000 |
| C  | -5.33975457 | 1.42026040  | 0.00000000 |
| C  | -1.42026040 | 5.33975457  | 0.00000000 |
| C  | -0.70190652 | 6.52690129  | 0.00000000 |
| C  | 0.70190652  | 6.52690129  | 0.00000000 |

|   |             |             |            |
|---|-------------|-------------|------------|
| C | 1.42026040  | 5.33975457  | 0.00000000 |
| C | 5.33975457  | 1.42026040  | 0.00000000 |
| C | 6.52690129  | 0.70190652  | 0.00000000 |
| C | 6.52690129  | -0.70190652 | 0.00000000 |
| C | 5.33975457  | -1.42026040 | 0.00000000 |
| C | 1.42026040  | -5.33975457 | 0.00000000 |
| C | 0.70190652  | -6.52690129 | 0.00000000 |
| C | -0.70190652 | -6.52690129 | 0.00000000 |
| C | -1.42026040 | -5.33975457 | 0.00000000 |
| H | -5.33184496 | -2.50182038 | 0.00000000 |
| H | -7.47257119 | -1.22985661 | 0.00000000 |
| H | -7.47257119 | 1.22985661  | 0.00000000 |
| H | -5.33184496 | 2.50182038  | 0.00000000 |
| H | -2.50182038 | 5.33184496  | 0.00000000 |
| H | -1.22985661 | 7.47257119  | 0.00000000 |
| H | 1.22985661  | 7.47257119  | 0.00000000 |
| H | 2.50182038  | 5.33184496  | 0.00000000 |
| H | 5.33184496  | 2.50182038  | 0.00000000 |
| H | 7.47257119  | 1.22985661  | 0.00000000 |
| H | 7.47257119  | -1.22985661 | 0.00000000 |
| H | 5.33184496  | -2.50182038 | 0.00000000 |
| H | 2.50182038  | -5.33184496 | 0.00000000 |
| H | 1.22985661  | -7.47257119 | 0.00000000 |
| H | -1.22985661 | -7.47257119 | 0.00000000 |
| H | -2.50182038 | -5.33184496 | 0.00000000 |

level of theory tpssh  
spin state IS3

| Occup.          | alpha   | beta |
|-----------------|---------|------|
| A <sub>1g</sub> | 21.0 // | 21.0 |
| A <sub>2g</sub> | 11.0 // | 11.0 |
| B <sub>1g</sub> | 15.0 // | 15.0 |
| B <sub>2g</sub> | 14.0 // | 13.0 |
| E <sub>1g</sub> | 12.0 // | 10.0 |
| A <sub>1u</sub> | 2.0 //  | 2.0  |
| A <sub>2u</sub> | 6.0 //  | 6.0  |
| B <sub>1u</sub> | 2.0 //  | 2.0  |
| B <sub>2u</sub> | 3.0 //  | 3.0  |
| E <sub>1u</sub> | 60.0 // | 60.0 |

|    |             |             |            |
|----|-------------|-------------|------------|
| Mn | 0.00000000  | 0.00000000  | 0.00000000 |
| N  | 2.37768228  | 2.37768228  | 0.00000000 |
| N  | -2.37768228 | 2.37768228  | 0.00000000 |
| N  | -2.37768228 | -2.37768228 | 0.00000000 |
| N  | 2.37768228  | -2.37768228 | 0.00000000 |
| N  | 0.00000000  | 1.95333081  | 0.00000000 |
| C  | 1.11412184  | 2.75695526  | 0.00000000 |
| C  | 0.70029730  | 4.14489404  | 0.00000000 |
| C  | -0.70029730 | 4.14489404  | 0.00000000 |
| C  | -1.11412184 | 2.75695526  | 0.00000000 |
| N  | -1.95333081 | 0.00000000  | 0.00000000 |
| C  | -2.75695526 | 1.11412184  | 0.00000000 |
| C  | -4.14489404 | 0.70029730  | 0.00000000 |

|   |             |             |            |
|---|-------------|-------------|------------|
| C | -4.14489404 | -0.70029730 | 0.00000000 |
| C | -2.75695526 | -1.11412184 | 0.00000000 |
| N | 0.00000000  | -1.95333081 | 0.00000000 |
| C | -1.11412184 | -2.75695526 | 0.00000000 |
| C | -0.70029730 | -4.14489404 | 0.00000000 |
| C | 0.70029730  | -4.14489404 | 0.00000000 |
| C | 1.11412184  | -2.75695526 | 0.00000000 |
| N | 1.95333081  | 0.00000000  | 0.00000000 |
| C | 2.75695526  | -1.11412184 | 0.00000000 |
| C | 4.14489404  | -0.70029730 | 0.00000000 |
| C | 4.14489404  | 0.70029730  | 0.00000000 |
| C | 2.75695526  | 1.11412184  | 0.00000000 |
| C | -5.33475967 | -1.42048001 | 0.00000000 |
| C | -6.52190427 | -0.70184143 | 0.00000000 |
| C | -6.52190427 | 0.70184143  | 0.00000000 |
| C | -5.33475967 | 1.42048001  | 0.00000000 |
| C | -1.42048001 | 5.33475967  | 0.00000000 |
| C | -0.70184143 | 6.52190427  | 0.00000000 |
| C | 0.70184143  | 6.52190427  | 0.00000000 |
| C | 1.42048001  | 5.33475967  | 0.00000000 |
| C | 5.33475967  | 1.42048001  | 0.00000000 |
| C | 6.52190427  | 0.70184143  | 0.00000000 |
| C | 6.52190427  | -0.70184143 | 0.00000000 |
| C | 5.33475967  | -1.42048001 | 0.00000000 |
| C | 1.42048001  | -5.33475967 | 0.00000000 |
| C | 0.70184143  | -6.52190427 | 0.00000000 |
| C | -0.70184143 | -6.52190427 | 0.00000000 |
| C | -1.42048001 | -5.33475967 | 0.00000000 |
| H | -5.32728345 | -2.50184525 | 0.00000000 |
| H | -7.46721962 | -1.23012914 | 0.00000000 |
| H | -7.46721962 | 1.23012914  | 0.00000000 |
| H | -5.32728345 | 2.50184525  | 0.00000000 |
| H | -2.50184525 | 5.32728345  | 0.00000000 |
| H | -1.23012914 | 7.46721962  | 0.00000000 |
| H | 1.23012914  | 7.46721962  | 0.00000000 |
| H | 2.50184525  | 5.32728345  | 0.00000000 |
| H | 5.32728345  | 2.50184525  | 0.00000000 |
| H | 7.46721962  | 1.23012914  | 0.00000000 |
| H | 7.46721962  | -1.23012914 | 0.00000000 |
| H | 5.32728345  | -2.50184525 | 0.00000000 |
| H | 2.50184525  | -5.32728345 | 0.00000000 |
| H | 1.23012914  | -7.46721962 | 0.00000000 |
| H | -1.23012914 | -7.46721962 | 0.00000000 |
| H | -2.50184525 | -5.32728345 | 0.00000000 |

level of theory tpssh  
spin state LS

|    |             |             |            |
|----|-------------|-------------|------------|
| Mn | 0.00000000  | 0.00000000  | 0.00000000 |
| N  | 2.38474097  | 2.38474097  | 0.00000000 |
| N  | -2.38474097 | 2.38474097  | 0.00000000 |
| N  | -2.38474097 | -2.38474097 | 0.00000000 |
| N  | 2.38474097  | -2.38474097 | 0.00000000 |
| N  | 0.00000000  | 1.96299147  | 0.00000000 |

|   |             |             |            |                 |             |             |            |
|---|-------------|-------------|------------|-----------------|-------------|-------------|------------|
| C | 1.11545537  | 2.77683962  | 0.00000000 | Occup.          | alpha       | beta        |            |
| C | 0.69907384  | 4.16643314  | 0.00000000 | A <sub>1g</sub> | 21.0        | //          | 20.0       |
| C | -0.69907384 | 4.16643314  | 0.00000000 | A <sub>2g</sub> | 11.0        | //          | 11.0       |
| C | -1.11545537 | 2.77683962  | 0.00000000 | B <sub>1g</sub> | 16.0        | //          | 15.0       |
| N | -1.96299147 | 0.00000000  | 0.00000000 | B <sub>2g</sub> | 14.0        | //          | 13.0       |
| C | -2.77683962 | 1.11545537  | 0.00000000 | E <sub>1g</sub> | 12.0        | //          | 10.0       |
| C | -4.16643314 | 0.69907384  | 0.00000000 | A <sub>1u</sub> | 2.0         | //          | 2.0        |
| C | -4.16643314 | -0.69907384 | 0.00000000 | A <sub>2u</sub> | 6.0         | //          | 6.0        |
| C | -2.77683962 | -1.11545537 | 0.00000000 | B <sub>1u</sub> | 2.0         | //          | 2.0        |
| N | 0.00000000  | -1.96299147 | 0.00000000 | B <sub>2u</sub> | 3.0         | //          | 3.0        |
| C | -1.11545537 | -2.77683962 | 0.00000000 | E <sub>1u</sub> | 60.0        | //          | 60.0       |
| C | -0.69907384 | -4.16643314 | 0.00000000 |                 |             |             |            |
| C | 0.69907384  | -4.16643314 | 0.00000000 |                 |             |             |            |
| C | 1.11545537  | -2.77683962 | 0.00000000 | Mn              | 0.00000000  | 0.00000000  | 0.00000000 |
| N | 1.96299147  | 0.00000000  | 0.00000000 | N               | 2.38643328  | 2.38643328  | 0.00000000 |
| C | 2.77683962  | -1.11545537 | 0.00000000 | N               | -2.38643328 | 2.38643328  | 0.00000000 |
| C | 4.16643314  | -0.69907384 | 0.00000000 | N               | -2.38643328 | -2.38643328 | 0.00000000 |
| C | 4.16643314  | 0.69907384  | 0.00000000 | N               | 2.38643328  | -2.38643328 | 0.00000000 |
| C | 2.77683962  | 1.11545537  | 0.00000000 | N               | 0.00000000  | 2.03183161  | 0.00000000 |
| C | -5.35335443 | -1.41213436 | 0.00000000 | C               | 1.12523139  | 2.80363451  | 0.00000000 |
| C | -6.52977842 | -0.69729263 | 0.00000000 | C               | 0.70503026  | 4.20146203  | 0.00000000 |
| C | -6.52977842 | 0.69729263  | 0.00000000 | C               | -0.70503026 | 4.20146203  | 0.00000000 |
| C | -5.35335443 | 1.41213436  | 0.00000000 | C               | -1.12523139 | 2.80363451  | 0.00000000 |
| C | -1.41213436 | 5.35335443  | 0.00000000 | N               | -2.03183161 | 0.00000000  | 0.00000000 |
| C | -0.69729263 | 6.52977842  | 0.00000000 | C               | -2.80363451 | 1.12523139  | 0.00000000 |
| C | 0.69729263  | 6.52977842  | 0.00000000 | C               | -4.20146203 | 0.70503026  | 0.00000000 |
| C | 1.41213436  | 5.35335443  | 0.00000000 | C               | -4.20146203 | -0.70503026 | 0.00000000 |
| C | 5.35335443  | 1.41213436  | 0.00000000 | C               | -2.80363451 | -1.12523139 | 0.00000000 |
| C | 6.52977842  | 0.69729263  | 0.00000000 | N               | 0.00000000  | -2.03183161 | 0.00000000 |
| C | 6.52977842  | -0.69729263 | 0.00000000 | C               | -1.12523139 | -2.80363451 | 0.00000000 |
| C | 5.35335443  | -1.41213436 | 0.00000000 | C               | -0.70503026 | -4.20146203 | 0.00000000 |
| C | 1.41213436  | -5.35335443 | 0.00000000 | C               | 0.70503026  | -4.20146203 | 0.00000000 |
| C | 0.69729263  | -6.52977842 | 0.00000000 | C               | 1.12523139  | -2.80363451 | 0.00000000 |
| C | -0.69729263 | -6.52977842 | 0.00000000 | N               | 2.03183161  | 0.00000000  | 0.00000000 |
| C | -1.41213436 | -5.35335443 | 0.00000000 | C               | 2.80363451  | -1.12523139 | 0.00000000 |
| H | -5.34962161 | -2.44952232 | 0.00000000 | C               | 4.20146203  | -0.70503026 | 0.00000000 |
| H | -7.44123543 | -1.20541285 | 0.00000000 | C               | 4.20146203  | 0.70503026  | 0.00000000 |
| H | -7.44123543 | 1.20541285  | 0.00000000 | C               | 2.80363451  | 1.12523139  | 0.00000000 |
| H | -5.34962161 | 2.44952232  | 0.00000000 | C               | -5.39358460 | -1.41703666 | 0.00000000 |
| H | -2.44952232 | 5.34962161  | 0.00000000 | C               | -6.58290888 | -0.70022744 | 0.00000000 |
| H | -1.20541285 | 7.44123543  | 0.00000000 | C               | -6.58290888 | 0.70022744  | 0.00000000 |
| H | 1.20541285  | 7.44123543  | 0.00000000 | C               | -5.39358460 | 1.41703666  | 0.00000000 |
| H | 2.44952232  | 5.34962161  | 0.00000000 | C               | -1.41703666 | 5.39358460  | 0.00000000 |
| H | 5.34962161  | 2.44952232  | 0.00000000 | C               | -0.70022744 | 6.58290888  | 0.00000000 |
| H | 7.44123543  | 1.20541285  | 0.00000000 | C               | 0.70022744  | 6.58290888  | 0.00000000 |
| H | 7.44123543  | -1.20541285 | 0.00000000 | C               | 1.41703666  | 5.39358460  | 0.00000000 |
| H | 5.34962161  | -2.44952232 | 0.00000000 | C               | 5.39358460  | 1.41703666  | 0.00000000 |
| H | 2.44952232  | -5.34962161 | 0.00000000 | C               | 6.58290888  | 0.70022744  | 0.00000000 |
| H | 1.20541285  | -7.44123543 | 0.00000000 | C               | 6.58290888  | -0.70022744 | 0.00000000 |
| H | -1.20541285 | -7.44123543 | 0.00000000 | C               | 5.39358460  | -1.41703666 | 0.00000000 |
| H | -2.44952232 | -5.34962161 | 0.00000000 | C               | 1.41703666  | -5.39358460 | 0.00000000 |
|   |             |             |            | C               | 0.70022744  | -6.58290888 | 0.00000000 |
|   |             |             |            | C               | -0.70022744 | -6.58290888 | 0.00000000 |
|   |             |             |            | C               | -1.41703666 | -5.39358460 | 0.00000000 |
|   |             |             |            | H               | -5.38851984 | -2.49811138 | 0.00000000 |

level of theory b3lyp\*  
spin state HS

|   |             |             |            |
|---|-------------|-------------|------------|
| H | -7.52624300 | -1.22998414 | 0.00000000 |
| H | -7.52624300 | 1.22998414  | 0.00000000 |
| H | -5.38851984 | 2.49811138  | 0.00000000 |
| H | -2.49811138 | 5.38851984  | 0.00000000 |
| H | -1.22998414 | 7.52624300  | 0.00000000 |
| H | 1.22998414  | 7.52624300  | 0.00000000 |
| H | 2.49811138  | 5.38851984  | 0.00000000 |
| H | 5.38851984  | 2.49811138  | 0.00000000 |
| H | 7.52624300  | 1.22998414  | 0.00000000 |
| H | 7.52624300  | -1.22998414 | 0.00000000 |
| H | 5.38851984  | -2.49811138 | 0.00000000 |
| H | 2.49811138  | -5.38851984 | 0.00000000 |
| H | 1.22998414  | -7.52624300 | 0.00000000 |
| H | -1.22998414 | -7.52624300 | 0.00000000 |
| H | -2.49811138 | -5.38851984 | 0.00000000 |

level of theory b3lyp\*  
spin state IS

| Occup.          | alpha   | beta |
|-----------------|---------|------|
| A <sub>1g</sub> | 21.0 // | 20.0 |
| A <sub>2g</sub> | 11.0 // | 11.0 |
| B <sub>1g</sub> | 15.0 // | 15.0 |
| B <sub>2g</sub> | 14.0 // | 13.0 |
| E <sub>1g</sub> | 12.0 // | 11.0 |
| A <sub>1u</sub> | 2.0 //  | 2.0  |
| A <sub>2u</sub> | 6.0 //  | 6.0  |
| B <sub>1u</sub> | 2.0 //  | 2.0  |
| B <sub>2u</sub> | 3.0 //  | 3.0  |
| E <sub>1u</sub> | 60.0 // | 60.0 |

|    |             |             |            |
|----|-------------|-------------|------------|
| Mn | 0.00000000  | 0.00000000  | 0.00000000 |
| N  | 2.37773467  | 2.37773467  | 0.00000000 |
| N  | -2.37773467 | 2.37773467  | 0.00000000 |
| N  | -2.37773467 | -2.37773467 | 0.00000000 |
| N  | 2.37773467  | -2.37773467 | 0.00000000 |
| N  | 0.00000000  | 1.94906511  | 0.00000000 |
| C  | 1.12071856  | 2.76053355  | 0.00000000 |
| C  | 0.70122124  | 4.14288211  | 0.00000000 |
| C  | -0.70122124 | 4.14288211  | 0.00000000 |
| C  | -1.12071856 | 2.76053355  | 0.00000000 |
| N  | -1.94906511 | 0.00000000  | 0.00000000 |
| C  | -2.76053355 | 1.12071856  | 0.00000000 |
| C  | -4.14288211 | 0.70122124  | 0.00000000 |
| C  | -4.14288211 | -0.70122124 | 0.00000000 |
| C  | -2.76053355 | -1.12071856 | 0.00000000 |
| N  | 0.00000000  | -1.94906511 | 0.00000000 |
| C  | -1.12071856 | -2.76053355 | 0.00000000 |
| C  | -0.70122124 | -4.14288211 | 0.00000000 |
| C  | 0.70122124  | -4.14288211 | 0.00000000 |
| C  | 1.12071856  | -2.76053355 | 0.00000000 |
| N  | 1.94906511  | 0.00000000  | 0.00000000 |
| C  | 2.76053355  | -1.12071856 | 0.00000000 |
| C  | 4.14288211  | -0.70122124 | 0.00000000 |

|   |             |             |            |
|---|-------------|-------------|------------|
| C | 4.14288211  | 0.70122124  | 0.00000000 |
| C | 2.76053355  | 1.12071856  | 0.00000000 |
| C | -5.33552010 | -1.41849242 | 0.00000000 |
| C | -6.52188575 | -0.70203988 | 0.00000000 |
| C | -6.52188575 | 0.70203988  | 0.00000000 |
| C | -5.33552010 | 1.41849242  | 0.00000000 |
| C | -1.41849242 | 5.33552010  | 0.00000000 |
| C | -0.70203988 | 6.52188575  | 0.00000000 |
| C | 0.70203988  | 6.52188575  | 0.00000000 |
| C | 1.41849242  | 5.33552010  | 0.00000000 |
| C | 5.33552010  | 1.41849242  | 0.00000000 |
| C | 6.52188575  | 0.70203988  | 0.00000000 |
| C | 6.52188575  | -0.70203988 | 0.00000000 |
| C | 5.33552010  | -1.41849242 | 0.00000000 |
| C | 1.41849242  | -5.33552010 | 0.00000000 |
| C | 0.70203988  | -6.52188575 | 0.00000000 |
| C | -0.70203988 | -6.52188575 | 0.00000000 |
| C | -1.41849242 | -5.33552010 | 0.00000000 |
| H | -5.32874028 | -2.49935018 | 0.00000000 |
| H | -7.46585593 | -1.23072658 | 0.00000000 |
| H | -7.46585593 | 1.23072658  | 0.00000000 |
| H | -5.32874028 | 2.49935018  | 0.00000000 |
| H | -2.49935018 | 5.32874028  | 0.00000000 |
| H | -1.23072658 | 7.46585593  | 0.00000000 |
| H | 1.23072658  | 7.46585593  | 0.00000000 |
| H | 2.49935018  | 5.32874028  | 0.00000000 |
| H | 5.32874028  | 2.49935018  | 0.00000000 |
| H | 7.46585593  | 1.23072658  | 0.00000000 |
| H | 7.46585593  | -1.23072658 | 0.00000000 |
| H | 5.32874028  | -2.49935018 | 0.00000000 |
| H | 2.49935018  | -5.32874028 | 0.00000000 |
| H | 1.23072658  | -7.46585593 | 0.00000000 |
| H | -1.23072658 | -7.46585593 | 0.00000000 |
| H | -2.49935018 | -5.32874028 | 0.00000000 |

level of theory b3lyp\*  
spin state IS2

| Occup.          | alpha   | beta |
|-----------------|---------|------|
| A <sub>1g</sub> | 21.0 // | 20.0 |
| A <sub>2g</sub> | 11.0 // | 11.0 |
| B <sub>1g</sub> | 15.0 // | 15.0 |
| B <sub>2g</sub> | 14.0 // | 14.0 |
| E <sub>1g</sub> | 12.0 // | 10.0 |
| A <sub>1u</sub> | 2.0 //  | 2.0  |
| A <sub>2u</sub> | 6.0 //  | 6.0  |
| B <sub>1u</sub> | 2.0 //  | 2.0  |
| B <sub>2u</sub> | 3.0 //  | 3.0  |
| E <sub>1u</sub> | 60.0 // | 60.0 |

|    |             |             |            |
|----|-------------|-------------|------------|
| Mn | 0.00000000  | 0.00000000  | 0.00000000 |
| N  | 2.37580952  | 2.37580952  | 0.00000000 |
| N  | -2.37580952 | 2.37580952  | 0.00000000 |
| N  | -2.37580952 | -2.37580952 | 0.00000000 |

|   |             |             |            |
|---|-------------|-------------|------------|
| N | 2.37580952  | -2.37580952 | 0.00000000 |
| N | 0.00000000  | 1.96485523  | 0.00000000 |
| C | 1.11472404  | 2.76371444  | 0.00000000 |
| C | 0.70155356  | 4.15561888  | 0.00000000 |
| C | -0.70155356 | 4.15561888  | 0.00000000 |
| C | -1.11472404 | 2.76371444  | 0.00000000 |
| N | -1.96485523 | 0.00000000  | 0.00000000 |
| C | -2.76371444 | 1.11472404  | 0.00000000 |
| C | -4.15561888 | 0.70155356  | 0.00000000 |
| C | -4.15561888 | -0.70155356 | 0.00000000 |
| C | -2.76371444 | -1.11472404 | 0.00000000 |
| N | 0.00000000  | -1.96485523 | 0.00000000 |
| C | -1.11472404 | -2.76371444 | 0.00000000 |
| C | -0.70155356 | -4.15561888 | 0.00000000 |
| C | 0.70155356  | -4.15561888 | 0.00000000 |
| C | 1.11472404  | -2.76371444 | 0.00000000 |
| N | 1.96485523  | 0.00000000  | 0.00000000 |
| C | 2.76371444  | -1.11472404 | 0.00000000 |
| C | 4.15561888  | -0.70155356 | 0.00000000 |
| C | 4.15561888  | 0.70155356  | 0.00000000 |
| C | 2.76371444  | 1.11472404  | 0.00000000 |
| C | -5.34648200 | -1.41809448 | 0.00000000 |
| C | -6.53421134 | -0.70113392 | 0.00000000 |
| C | -6.53421134 | 0.70113392  | 0.00000000 |
| C | -5.34648200 | 1.41809448  | 0.00000000 |
| C | -1.41809448 | 5.34648200  | 0.00000000 |
| C | -0.70113392 | 6.53421134  | 0.00000000 |
| C | 0.70113392  | 6.53421134  | 0.00000000 |
| C | 1.41809448  | 5.34648200  | 0.00000000 |
| C | 5.34648200  | 1.41809448  | 0.00000000 |
| C | 6.53421134  | 0.70113392  | 0.00000000 |
| C | 6.53421134  | -0.70113392 | 0.00000000 |
| C | 5.34648200  | -1.41809448 | 0.00000000 |
| C | 1.41809448  | -5.34648200 | 0.00000000 |
| C | 0.70113392  | -6.53421134 | 0.00000000 |
| C | -0.70113392 | -6.53421134 | 0.00000000 |
| C | -1.41809448 | -5.34648200 | 0.00000000 |
| H | -5.33973552 | -2.49915015 | 0.00000000 |
| H | -7.47822334 | -1.22995239 | 0.00000000 |
| H | -7.47822334 | 1.22995239  | 0.00000000 |
| H | -5.33973552 | 2.49915015  | 0.00000000 |
| H | -2.49915015 | 5.33973552  | 0.00000000 |
| H | -1.22995239 | 7.47822334  | 0.00000000 |
| H | 1.22995239  | 7.47822334  | 0.00000000 |
| H | 2.49915015  | 5.33973552  | 0.00000000 |
| H | 5.33973552  | 2.49915015  | 0.00000000 |
| H | 7.47822334  | 1.22995239  | 0.00000000 |
| H | 7.47822334  | -1.22995239 | 0.00000000 |
| H | 5.33973552  | -2.49915015 | 0.00000000 |
| H | 2.49915015  | -5.33973552 | 0.00000000 |
| H | 1.22995239  | -7.47822334 | 0.00000000 |
| H | -1.22995239 | -7.47822334 | 0.00000000 |
| H | -2.49915015 | -5.33973552 | 0.00000000 |

level of theory b3lyp\*

spin state IS3

| Occup.          | alpha   | beta |
|-----------------|---------|------|
| A <sub>1g</sub> | 21.0 // | 21.0 |
| A <sub>2g</sub> | 11.0 // | 11.0 |
| B <sub>1g</sub> | 15.0 // | 15.0 |
| B <sub>2g</sub> | 14.0 // | 13.0 |
| E <sub>1g</sub> | 12.0 // | 10.0 |
| A <sub>1u</sub> | 2.0 //  | 2.0  |
| A <sub>2u</sub> | 6.0 //  | 6.0  |
| B <sub>1u</sub> | 2.0 //  | 2.0  |
| B <sub>2u</sub> | 3.0 //  | 3.0  |
| E <sub>1u</sub> | 60.0 // | 60.0 |

|    |             |             |            |
|----|-------------|-------------|------------|
| Mn | 0.00000000  | 0.00000000  | 0.00000000 |
| N  | 2.37466015  | 2.37466015  | 0.00000000 |
| N  | -2.37466015 | 2.37466015  | 0.00000000 |
| N  | -2.37466015 | -2.37466015 | 0.00000000 |
| N  | 2.37466015  | -2.37466015 | 0.00000000 |
| N  | 0.00000000  | 1.96180241  | 0.00000000 |
| C  | 1.11512939  | 2.76066743  | 0.00000000 |
| C  | 0.70085240  | 4.15151246  | 0.00000000 |
| C  | -0.70085240 | 4.15151246  | 0.00000000 |
| C  | -1.11512939 | 2.76066743  | 0.00000000 |
| N  | -1.96180241 | 0.00000000  | 0.00000000 |
| C  | -2.76066743 | 1.11512939  | 0.00000000 |
| C  | -4.15151246 | 0.70085240  | 0.00000000 |
| C  | -4.15151246 | -0.70085240 | 0.00000000 |
| C  | -2.76066743 | -1.11512939 | 0.00000000 |
| N  | 0.00000000  | -1.96180241 | 0.00000000 |
| C  | -1.11512939 | -2.76066743 | 0.00000000 |
| C  | -0.70085240 | -4.15151246 | 0.00000000 |
| C  | 0.70085240  | -4.15151246 | 0.00000000 |
| C  | 1.11512939  | -2.76066743 | 0.00000000 |
| N  | 1.96180241  | 0.00000000  | 0.00000000 |
| C  | 2.76066743  | -1.11512939 | 0.00000000 |
| C  | 4.15151246  | -0.70085240 | 0.00000000 |
| C  | 4.15151246  | 0.70085240  | 0.00000000 |
| C  | 2.76066743  | 1.11512939  | 0.00000000 |
| C  | -5.34165114 | -1.41830774 | 0.00000000 |
| C  | -6.52925877 | -0.70112070 | 0.00000000 |
| C  | -6.52925877 | 0.70112070  | 0.00000000 |
| C  | -5.34165114 | 1.41830774  | 0.00000000 |
| C  | -1.41830774 | 5.34165114  | 0.00000000 |
| C  | -0.70112070 | 6.52925877  | 0.00000000 |
| C  | 0.70112070  | 6.52925877  | 0.00000000 |
| C  | 1.41830774  | 5.34165114  | 0.00000000 |
| C  | 5.34165114  | 1.41830774  | 0.00000000 |
| C  | 6.52925877  | 0.70112070  | 0.00000000 |
| C  | 6.52925877  | -0.70112070 | 0.00000000 |
| C  | 5.34165114  | -1.41830774 | 0.00000000 |
| C  | 1.41830774  | -5.34165114 | 0.00000000 |
| C  | 0.70112070  | -6.52925877 | 0.00000000 |
| C  | -0.70112070 | -6.52925877 | 0.00000000 |

|   |             |             |            |
|---|-------------|-------------|------------|
| C | -1.41830774 | -5.34165114 | 0.00000000 |
| H | -5.33481629 | -2.49916074 | 0.00000000 |
| H | -7.47306809 | -1.22993175 | 0.00000000 |
| H | -7.47306809 | 1.22993175  | 0.00000000 |
| H | -5.33481629 | 2.49916074  | 0.00000000 |
| H | -2.49916074 | 5.33481629  | 0.00000000 |
| H | -1.22993175 | 7.47306809  | 0.00000000 |
| H | 1.22993175  | 7.47306809  | 0.00000000 |
| H | 2.49916074  | 5.33481629  | 0.00000000 |
| H | 5.33481629  | 2.49916074  | 0.00000000 |
| H | 7.47306809  | 1.22993175  | 0.00000000 |
| H | 7.47306809  | -1.22993175 | 0.00000000 |
| H | 5.33481629  | -2.49916074 | 0.00000000 |
| H | 2.49916074  | -5.33481629 | 0.00000000 |
| H | 1.22993175  | -7.47306809 | 0.00000000 |
| H | -1.22993175 | -7.47306809 | 0.00000000 |
| H | -2.49916074 | -5.33481629 | 0.00000000 |

level of theory b3lyp\*  
spin state LS

| Occup.          | alpha   | beta |
|-----------------|---------|------|
| A <sub>1g</sub> | 21.0 // | 20.0 |
| A <sub>2g</sub> | 11.0 // | 11.0 |
| B <sub>1g</sub> | 15.0 // | 15.0 |
| B <sub>2g</sub> | 14.0 // | 13.0 |
| E <sub>1g</sub> | 12.0 // | 12.0 |
| A <sub>1u</sub> | 1.0 //  | 2.0  |
| A <sub>2u</sub> | 6.0 //  | 6.0  |
| B <sub>1u</sub> | 2.0 //  | 2.0  |
| B <sub>2u</sub> | 3.0 //  | 3.0  |
| E <sub>1u</sub> | 60.0 // | 60.0 |

|    |             |             |            |
|----|-------------|-------------|------------|
| Mn | 0.00000000  | 0.00000000  | 0.00000000 |
| N  | 2.38111558  | 2.38111558  | 0.00000000 |
| N  | -2.38111558 | 2.38111558  | 0.00000000 |
| N  | -2.38111558 | -2.38111558 | 0.00000000 |
| N  | 2.38111558  | -2.38111558 | 0.00000000 |
| N  | 0.00000000  | 1.94270652  | 0.00000000 |
| C  | 1.12064818  | 2.75748020  | 0.00000000 |
| C  | 0.69977129  | 4.14703404  | 0.00000000 |
| C  | -0.69977129 | 4.14703404  | 0.00000000 |
| C  | -1.12064818 | 2.75748020  | 0.00000000 |
| N  | -1.94270652 | 0.00000000  | 0.00000000 |
| C  | -2.75748020 | 1.12064818  | 0.00000000 |
| C  | -4.14703404 | 0.69977129  | 0.00000000 |
| C  | -4.14703404 | -0.69977129 | 0.00000000 |
| C  | -2.75748020 | -1.12064818 | 0.00000000 |
| N  | 0.00000000  | -1.94270652 | 0.00000000 |
| C  | -1.12064818 | -2.75748020 | 0.00000000 |
| C  | -0.69977129 | -4.14703404 | 0.00000000 |
| C  | 0.69977129  | -4.14703404 | 0.00000000 |
| C  | 1.12064818  | -2.75748020 | 0.00000000 |
| N  | 1.94270652  | 0.00000000  | 0.00000000 |

|   |             |             |            |
|---|-------------|-------------|------------|
| C | 2.75748020  | -1.12064818 | 0.00000000 |
| C | 4.14703404  | -0.69977129 | 0.00000000 |
| C | 4.14703404  | 0.69977129  | 0.00000000 |
| C | 2.75748020  | 1.12064818  | 0.00000000 |
| C | -5.33448079 | -1.41635402 | 0.00000000 |
| C | -6.52735850 | -0.69902568 | 0.00000000 |
| C | -6.52735850 | 0.69902568  | 0.00000000 |
| C | -5.33448079 | 1.41635402  | 0.00000000 |
| C | -1.41635402 | 5.33448079  | 0.00000000 |
| C | -0.69902568 | 6.52735850  | 0.00000000 |
| C | 0.69902568  | 6.52735850  | 0.00000000 |
| C | 1.41635402  | 5.33448079  | 0.00000000 |
| C | 5.33448079  | 1.41635402  | 0.00000000 |
| C | 6.52735850  | 0.69902568  | 0.00000000 |
| C | 6.52735850  | -0.69902568 | 0.00000000 |
| C | 5.33448079  | -1.41635402 | 0.00000000 |
| C | 1.41635402  | -5.33448079 | 0.00000000 |
| C | 0.69902568  | -6.52735850 | 0.00000000 |
| C | -0.69902568 | -6.52735850 | 0.00000000 |
| C | -1.41635402 | -5.33448079 | 0.00000000 |
| H | -5.32736071 | -2.49736048 | 0.00000000 |
| H | -7.46990520 | -1.23024556 | 0.00000000 |
| H | -7.46990520 | 1.23024556  | 0.00000000 |
| H | -5.32736071 | 2.49736048  | 0.00000000 |
| H | -2.49736048 | 5.32736071  | 0.00000000 |
| H | -1.23024556 | 7.46990520  | 0.00000000 |
| H | 1.23024556  | 7.46990520  | 0.00000000 |
| H | 2.49736048  | 5.32736071  | 0.00000000 |
| H | 5.32736071  | 2.49736048  | 0.00000000 |
| H | 7.46990520  | 1.23024556  | 0.00000000 |
| H | 7.46990520  | -1.23024556 | 0.00000000 |
| H | 5.32736071  | -2.49736048 | 0.00000000 |
| H | 2.49736048  | -5.32736071 | 0.00000000 |
| H | 1.23024556  | -7.46990520 | 0.00000000 |
| H | -1.23024556 | -7.46990520 | 0.00000000 |
| H | -2.49736048 | -5.32736071 | 0.00000000 |

**Cartesian coordinates for  $\text{Pc}^{3-}$  in HS and LS  
minimum structures obtained by LDA.**

**HS**

|   |           |           |          |
|---|-----------|-----------|----------|
| N | 2.377060  | 2.377060  | 0.000000 |
| N | -2.377060 | 2.377060  | 0.000000 |
| N | -2.377060 | -2.377060 | 0.000000 |
| N | 2.377060  | -2.377060 | 0.000000 |
| N | 0.000000  | 1.975477  | 0.000000 |
| C | 1.096449  | 2.752524  | 0.000000 |
| C | 0.707272  | 4.153510  | 0.000000 |
| C | -0.707272 | 4.153510  | 0.000000 |
| C | -1.096449 | 2.752524  | 0.000000 |
| N | -1.975477 | 0.000000  | 0.000000 |
| C | -2.752524 | 1.096449  | 0.000000 |
| C | -4.153510 | 0.707272  | 0.000000 |
| C | -4.153510 | -0.707272 | 0.000000 |
| C | -2.752524 | -1.096449 | 0.000000 |
| N | 0.000000  | -1.975477 | 0.000000 |
| C | -1.096449 | -2.752524 | 0.000000 |
| C | -0.707272 | -4.153510 | 0.000000 |
| C | 0.707272  | -4.153510 | 0.000000 |
| C | 1.096449  | -2.752524 | 0.000000 |
| N | 1.975477  | 0.000000  | 0.000000 |
| C | 2.752524  | -1.096449 | 0.000000 |
| C | 4.153510  | -0.707272 | 0.000000 |
| C | 4.153510  | 0.707272  | 0.000000 |
| C | 2.752524  | 1.096449  | 0.000000 |
| C | -5.347039 | -1.407140 | 0.000000 |
| C | -6.543763 | -0.701259 | 0.000000 |
| C | -6.543763 | 0.701259  | 0.000000 |
| C | -5.347039 | 1.407140  | 0.000000 |
| C | -1.407140 | 5.347039  | 0.000000 |
| C | -0.701259 | 6.543763  | 0.000000 |
| C | 0.701259  | 6.543763  | 0.000000 |
| C | 1.407140  | 5.347039  | 0.000000 |
| C | 5.347039  | 1.407140  | 0.000000 |
| C | 6.543763  | 0.701259  | 0.000000 |
| C | 6.543763  | -0.701259 | 0.000000 |
| C | 5.347039  | -1.407140 | 0.000000 |
| C | 1.407140  | -5.347039 | 0.000000 |
| C | 0.701259  | -6.543763 | 0.000000 |
| C | -0.701259 | -6.543763 | 0.000000 |
| C | -1.407140 | -5.347039 | 0.000000 |
| H | -5.323716 | -2.502401 | 0.000000 |
| H | -7.499110 | -1.239699 | 0.000000 |
| H | -7.499110 | 1.239699  | 0.000000 |
| H | -5.323716 | 2.502401  | 0.000000 |
| H | -2.502401 | 5.323716  | 0.000000 |
| H | -1.239699 | 7.499110  | 0.000000 |
| H | 1.239699  | 7.499110  | 0.000000 |

|   |           |           |          |
|---|-----------|-----------|----------|
| H | 2.502401  | 5.323716  | 0.000000 |
| H | 5.323716  | 2.502401  | 0.000000 |
| H | 7.499110  | 1.239699  | 0.000000 |
| H | 7.499110  | -1.239699 | 0.000000 |
| H | 5.323716  | -2.502401 | 0.000000 |
| H | 2.502401  | -5.323716 | 0.000000 |
| H | 1.239699  | -7.499110 | 0.000000 |
| H | -1.239699 | -7.499110 | 0.000000 |
| H | -2.502401 | -5.323716 | 0.000000 |

**LS min**

|   |           |           |          |
|---|-----------|-----------|----------|
| N | 0.000000  | 3.374861  | 0.000000 |
| N | -3.348043 | 0.000000  | 0.000000 |
| N | 0.000000  | -3.374861 | 0.000000 |
| N | 3.348043  | 0.000000  | 0.000000 |
| N | -1.386818 | 1.404421  | 0.000000 |
| C | -1.169459 | 2.721864  | 0.000000 |
| C | -2.443845 | 3.433961  | 0.000000 |
| C | -3.439556 | 2.430502  | 0.000000 |
| C | -2.719108 | 1.172199  | 0.000000 |
| N | -1.386818 | -1.404421 | 0.000000 |
| C | -2.719108 | -1.172199 | 0.000000 |
| C | -3.439556 | -2.430502 | 0.000000 |
| C | -2.443845 | -3.433961 | 0.000000 |
| C | -1.169459 | -2.721864 | 0.000000 |
| N | 1.386818  | -1.404421 | 0.000000 |
| C | 1.169459  | -2.721864 | 0.000000 |
| C | 2.443845  | -3.433961 | 0.000000 |
| C | 3.439556  | -2.430502 | 0.000000 |
| C | 2.719108  | -1.172199 | 0.000000 |
| N | 1.386818  | 1.404421  | 0.000000 |
| C | 2.719108  | 1.172199  | 0.000000 |
| C | 3.439556  | 2.430502  | 0.000000 |
| C | 2.443845  | 3.433961  | 0.000000 |
| C | 1.169459  | 2.721864  | 0.000000 |
| C | -2.793803 | -4.770772 | 0.000000 |
| C | -4.140704 | -5.117994 | 0.000000 |
| C | -5.128537 | -4.123079 | 0.000000 |
| C | -4.780368 | -2.778801 | 0.000000 |
| C | -4.780368 | 2.778801  | 0.000000 |
| C | -5.128537 | 4.123079  | 0.000000 |
| C | -4.140704 | 5.117994  | 0.000000 |
| C | -2.793803 | 4.770772  | 0.000000 |
| C | 2.793803  | 4.770772  | 0.000000 |
| C | 4.140704  | 5.117994  | 0.000000 |
| C | 5.128537  | 4.123079  | 0.000000 |
| C | 4.780368  | 2.778801  | 0.000000 |
| C | 4.780368  | -2.778801 | 0.000000 |
| C | 5.128537  | -4.123079 | 0.000000 |
| C | 4.140704  | -5.117994 | 0.000000 |
| C | 2.793803  | -4.770772 | 0.000000 |

|   |           |           |          |
|---|-----------|-----------|----------|
| H | -2.002491 | -5.528628 | 0.000000 |
| H | -4.437174 | -6.173500 | 0.000000 |
| H | -6.185788 | -4.414408 | 0.000000 |
| H | -5.538884 | -1.988307 | 0.000000 |
| H | -5.538884 | 1.988307  | 0.000000 |
| H | -6.185788 | 4.414408  | 0.000000 |
| H | -4.437174 | 6.173500  | 0.000000 |
| H | -2.002491 | 5.528628  | 0.000000 |
| H | 2.002491  | 5.528628  | 0.000000 |
| H | 4.437174  | 6.173500  | 0.000000 |
| H | 6.185788  | 4.414408  | 0.000000 |
| H | 5.538884  | 1.988307  | 0.000000 |
| H | 5.538884  | -1.988307 | 0.000000 |
| H | 6.185788  | -4.414408 | 0.000000 |
| H | 4.437174  | -6.173500 | 0.000000 |
| H | 2.002491  | -5.528628 | 0.000000 |

#### LS TS

|   |           |           |          |
|---|-----------|-----------|----------|
| N | 2.372782  | 2.381236  | 0.000000 |
| N | -2.372782 | 2.381236  | 0.000000 |
| N | -2.372782 | -2.381236 | 0.000000 |
| N | 2.372782  | -2.381236 | 0.000000 |
| N | 0.000000  | 1.954888  | 0.000000 |
| C | 1.096880  | 2.733517  | 0.000000 |
| C | 0.702649  | 4.143245  | 0.000000 |
| C | -0.702649 | 4.143245  | 0.000000 |
| C | -1.096880 | 2.733517  | 0.000000 |
| N | -1.994017 | 0.000000  | 0.000000 |
| C | -2.770691 | 1.094965  | 0.000000 |
| C | -4.164122 | 0.711254  | 0.000000 |
| C | -4.164122 | -0.711254 | 0.000000 |
| C | -2.770691 | -1.094965 | 0.000000 |
| N | 0.000000  | -1.954888 | 0.000000 |
| C | -1.096880 | -2.733517 | 0.000000 |
| C | -0.702649 | -4.143245 | 0.000000 |
| C | 0.702649  | -4.143245 | 0.000000 |
| C | 1.096880  | -2.733517 | 0.000000 |
| N | 1.994017  | 0.000000  | 0.000000 |
| C | 2.770691  | -1.094965 | 0.000000 |
| C | 4.164122  | -0.711254 | 0.000000 |
| C | 4.164122  | 0.711254  | 0.000000 |
| C | 2.770691  | 1.094965  | 0.000000 |
| C | -5.361828 | -1.407932 | 0.000000 |
| C | -6.558096 | -0.703207 | 0.000000 |
| C | -6.558096 | 0.703207  | 0.000000 |
| C | -5.361828 | 1.407932  | 0.000000 |
| C | -1.406146 | 5.332906  | 0.000000 |
| C | -0.698661 | 6.530228  | 0.000000 |
| C | 0.698661  | 6.530228  | 0.000000 |
| C | 1.406146  | 5.332906  | 0.000000 |
| C | 5.361828  | 1.407932  | 0.000000 |

|   |           |           |          |
|---|-----------|-----------|----------|
| C | 6.558096  | 0.703207  | 0.000000 |
| C | 6.558096  | -0.703207 | 0.000000 |
| C | 5.361828  | -1.407932 | 0.000000 |
| C | 1.406146  | -5.332906 | 0.000000 |
| C | 0.698661  | -6.530228 | 0.000000 |
| C | -0.698661 | -6.530228 | 0.000000 |
| C | -1.406146 | -5.332906 | 0.000000 |
| H | -5.342497 | -2.503615 | 0.000000 |
| H | -7.512995 | -1.242482 | 0.000000 |
| H | -7.512995 | 1.242482  | 0.000000 |
| H | -5.342497 | 2.503615  | 0.000000 |
| H | -2.501163 | 5.305584  | 0.000000 |
| H | -1.236523 | 7.485775  | 0.000000 |
| H | 1.236523  | 7.485775  | 0.000000 |
| H | 2.501163  | 5.305584  | 0.000000 |
| H | 5.342497  | 2.503615  | 0.000000 |
| H | 7.512995  | 1.242482  | 0.000000 |
| H | 7.512995  | -1.242482 | 0.000000 |
| H | 5.342497  | -2.503615 | 0.000000 |
| H | 2.501163  | -5.305584 | 0.000000 |
| H | 1.236523  | -7.485775 | 0.000000 |
| H | -1.236523 | -7.485775 | 0.000000 |
| H | -2.501163 | -5.305584 | 0.000000 |

#### Cartesian coordinates for MgPc<sup>-</sup> in HS and LS minimum structures obtained by LDA.

##### HS

|    |           |           |          |
|----|-----------|-----------|----------|
| Mg | 0.000000  | 0.000000  | 0.000000 |
| N  | 2.380425  | 2.380425  | 0.000000 |
| N  | -2.380425 | 2.380425  | 0.000000 |
| N  | -2.380425 | -2.380425 | 0.000000 |
| N  | 2.380425  | -2.380425 | 0.000000 |
| N  | 0.000000  | 1.989035  | 0.000000 |
| C  | 1.117407  | 2.773655  | 0.000000 |
| C  | 0.702697  | 4.152829  | 0.000000 |
| C  | -0.702697 | 4.152829  | 0.000000 |
| C  | -1.117407 | 2.773655  | 0.000000 |
| N  | -1.989035 | 0.000000  | 0.000000 |
| C  | -2.773655 | 1.117407  | 0.000000 |
| C  | -4.152829 | 0.702697  | 0.000000 |
| C  | -4.152829 | -0.702697 | 0.000000 |
| C  | -2.773655 | -1.117407 | 0.000000 |
| N  | 0.000000  | -1.989035 | 0.000000 |
| C  | -1.117407 | -2.773655 | 0.000000 |
| C  | -0.702697 | -4.152829 | 0.000000 |
| C  | 0.702697  | -4.152829 | 0.000000 |
| C  | 1.117407  | -2.773655 | 0.000000 |
| N  | 1.989035  | 0.000000  | 0.000000 |
| C  | 2.773655  | -1.117407 | 0.000000 |



|   |           |           |          |
|---|-----------|-----------|----------|
| C | 4.152829  | -0.702697 | 0.000000 |
| C | 4.152829  | 0.702697  | 0.000000 |
| C | 2.773655  | 1.117407  | 0.000000 |
| C | -5.342344 | -1.410983 | 0.000000 |
| C | -6.527566 | -0.699329 | 0.000000 |
| C | -6.527566 | 0.699329  | 0.000000 |
| C | -5.342344 | 1.410983  | 0.000000 |
| C | -1.410983 | 5.342344  | 0.000000 |
| C | -0.699329 | 6.527566  | 0.000000 |
| C | 0.699329  | 6.527566  | 0.000000 |
| C | 1.410983  | 5.342344  | 0.000000 |
| C | 5.342344  | 1.410983  | 0.000000 |
| C | 6.527566  | 0.699329  | 0.000000 |
| C | 6.527566  | -0.699329 | 0.000000 |
| C | 5.342344  | -1.410983 | 0.000000 |
| C | 1.410983  | -5.342344 | 0.000000 |
| C | 0.699329  | -6.527566 | 0.000000 |
| C | -0.699329 | -6.527566 | 0.000000 |
| C | -1.410983 | -5.342344 | 0.000000 |
| H | -5.325142 | -2.504148 | 0.000000 |
| H | -7.481291 | -1.233810 | 0.000000 |
| H | -7.481291 | 1.233810  | 0.000000 |
| H | -5.325142 | 2.504148  | 0.000000 |
| H | -2.504148 | 5.325142  | 0.000000 |
| H | -1.233810 | 7.481291  | 0.000000 |
| H | 1.233810  | 7.481291  | 0.000000 |
| H | 2.504148  | 5.325142  | 0.000000 |
| H | 5.325142  | 2.504148  | 0.000000 |
| H | 7.481291  | 1.233810  | 0.000000 |
| H | 7.481291  | -1.233810 | 0.000000 |
| H | 5.325142  | -2.504148 | 0.000000 |
| H | 2.504148  | -5.325142 | 0.000000 |
| H | 1.233810  | -7.481291 | 0.000000 |
| H | -1.233810 | -7.481291 | 0.000000 |
| H | -2.504148 | -5.325142 | 0.000000 |

#### LS min

|    |           |           |          |
|----|-----------|-----------|----------|
| Mg | 0.000000  | 0.000000  | 0.000000 |
| N  | 2.389324  | 2.371886  | 0.000000 |
| N  | -2.389324 | 2.371886  | 0.000000 |
| N  | -2.389324 | -2.371886 | 0.000000 |
| N  | 2.389324  | -2.371886 | 0.000000 |
| N  | 0.000000  | 1.993977  | 0.000000 |
| C  | 1.114701  | 2.777098  | 0.000000 |
| C  | 0.705834  | 4.147941  | 0.000000 |
| C  | -0.705834 | 4.147941  | 0.000000 |
| C  | -1.114701 | 2.777098  | 0.000000 |
| N  | -1.982839 | 0.000000  | 0.000000 |
| C  | -2.768767 | 1.119542  | 0.000000 |
| C  | -4.157840 | 0.699252  | 0.000000 |
| C  | -4.157840 | -0.699252 | 0.000000 |

|   |           |           |          |
|---|-----------|-----------|----------|
| C | -2.768767 | -1.119542 | 0.000000 |
| N | 0.000000  | -1.993977 | 0.000000 |
| C | -1.114701 | -2.777098 | 0.000000 |
| C | -0.705834 | -4.147941 | 0.000000 |
| C | 0.705834  | -4.147941 | 0.000000 |
| C | 1.114701  | -2.777098 | 0.000000 |
| N | 1.982839  | 0.000000  | 0.000000 |
| C | 2.768767  | -1.119542 | 0.000000 |
| C | 4.157840  | -0.699252 | 0.000000 |
| C | 4.157840  | 0.699252  | 0.000000 |
| C | 2.768767  | 1.119542  | 0.000000 |
| C | -5.342426 | -1.410102 | 0.000000 |
| C | -6.529862 | -0.697316 | 0.000000 |
| C | -6.529862 | 0.697316  | 0.000000 |
| C | -5.342426 | 1.410102  | 0.000000 |
| C | -1.412460 | 5.342094  | 0.000000 |
| C | -0.701232 | 6.524225  | 0.000000 |
| C | 0.701232  | 6.524225  | 0.000000 |
| C | 1.412460  | 5.342094  | 0.000000 |
| C | 5.342426  | 1.410102  | 0.000000 |
| C | 6.529862  | 0.697316  | 0.000000 |
| C | 6.529862  | -0.697316 | 0.000000 |
| C | 5.342426  | -1.410102 | 0.000000 |
| C | 1.412460  | -5.342094 | 0.000000 |
| C | 0.701232  | -6.524225 | 0.000000 |
| C | -0.701232 | -6.524225 | 0.000000 |
| C | -1.412460 | -5.342094 | 0.000000 |
| H | -5.321824 | -2.502853 | 0.000000 |
| H | -7.483364 | -1.231729 | 0.000000 |
| H | -7.483364 | 1.231729  | 0.000000 |
| H | -5.321824 | 2.502853  | 0.000000 |
| H | -2.505470 | 5.326988  | 0.000000 |
| H | -1.234479 | 7.478506  | 0.000000 |
| H | 1.234479  | 7.478506  | 0.000000 |
| H | 2.505470  | 5.326988  | 0.000000 |
| H | 5.321824  | 2.502853  | 0.000000 |
| H | 7.483364  | 1.231729  | 0.000000 |
| H | 7.483364  | -1.231729 | 0.000000 |
| H | 5.321824  | -2.502853 | 0.000000 |
| H | 2.505470  | -5.326988 | 0.000000 |
| H | 1.234479  | -7.478506 | 0.000000 |
| H | -1.234479 | -7.478506 | 0.000000 |
| H | -2.505470 | -5.326988 | 0.000000 |

#### LS TS

|    |           |           |          |
|----|-----------|-----------|----------|
| Mg | 0.000002  | -0.000001 | 0.000000 |
| N  | 2.388073  | 2.388082  | 0.000000 |
| N  | -2.372506 | 2.372542  | 0.000000 |
| N  | -2.388081 | -2.388088 | 0.000000 |
| N  | 2.372508  | -2.372535 | 0.000000 |
| N  | 0.011233  | 1.988443  | 0.000000 |

|   |           |           |          |
|---|-----------|-----------|----------|
| C | 1.117089  | 2.770140  | 0.000000 |
| C | 0.699122  | 4.153663  | 0.000000 |
| C | -0.705695 | 4.152166  | 0.000000 |
| C | -1.117946 | 2.776411  | 0.000000 |
| N | -1.988450 | -0.011216 | 0.000000 |
| C | -2.776411 | 1.117972  | 0.000000 |
| C | -4.152142 | 0.705694  | 0.000000 |
| C | -4.153684 | -0.699141 | 0.000000 |
| C | -2.770143 | -1.117073 | 0.000000 |
| N | -0.011238 | -1.988447 | 0.000000 |
| C | -1.117093 | -2.770145 | 0.000000 |
| C | -0.699123 | -4.153669 | 0.000000 |
| C | 0.705698  | -4.152167 | 0.000000 |
| C | 1.117947  | -2.776410 | 0.000000 |
| N | 1.988452  | 0.011221  | 0.000000 |
| C | 2.776413  | -1.117967 | 0.000000 |
| C | 4.152143  | -0.705689 | 0.000000 |
| C | 4.153681  | 0.699143  | 0.000000 |
| C | 2.770141  | 1.117073  | 0.000000 |
| C | -5.338008 | -1.412435 | 0.000000 |
| C | -6.526971 | -0.705500 | 0.000000 |
| C | -6.527476 | 0.692991  | 0.000000 |
| C | -5.346324 | 1.409803  | 0.000000 |
| C | -1.409787 | 5.346335  | 0.000000 |
| C | -0.692985 | 6.527481  | 0.000000 |
| C | 0.705497  | 6.526940  | 0.000000 |
| C | 1.412427  | 5.337968  | 0.000000 |
| C | 5.337999  | 1.412438  | 0.000000 |
| C | 6.526964  | 0.705509  | 0.000000 |
| C | 6.527474  | -0.692981 | 0.000000 |
| C | 5.346323  | -1.409796 | 0.000000 |
| C | 1.409794  | -5.346337 | 0.000000 |
| C | 0.692995  | -6.527485 | 0.000000 |
| C | -0.705488 | -6.526951 | 0.000000 |
| C | -1.412425 | -5.337981 | 0.000000 |
| H | -5.313015 | -2.505269 | 0.000000 |
| H | -7.479451 | -1.241384 | 0.000000 |
| H | -7.482466 | 1.225248  | 0.000000 |
| H | -5.335467 | 2.502704  | 0.000000 |
| H | -2.502685 | 5.335472  | 0.000000 |
| H | -1.225226 | 7.482474  | 0.000000 |
| H | 1.241400  | 7.479407  | 0.000000 |
| H | 2.505257  | 5.312969  | 0.000000 |
| H | 5.313000  | 2.505269  | 0.000000 |
| H | 7.479441  | 1.241396  | 0.000000 |
| H | 7.482464  | -1.225235 | 0.000000 |
| H | 5.335468  | -2.502696 | 0.000000 |
| H | 2.502692  | -5.335472 | 0.000000 |
| H | 1.225240  | -7.482477 | 0.000000 |
| H | -1.241386 | -7.479422 | 0.000000 |
| H | -2.505257 | -5.312987 | 0.000000 |

**Cartesian coordinates for MnPc in HS and LS minimum structures obtained by LDA.**

**HS**

|    |           |           |          |
|----|-----------|-----------|----------|
| Mn | 0.000000  | 0.000000  | 0.000000 |
| N  | 2.362463  | 2.362463  | 0.000000 |
| N  | -2.362463 | 2.362463  | 0.000000 |
| N  | -2.362463 | -2.362463 | 0.000000 |
| N  | 2.362463  | -2.362463 | 0.000000 |
| N  | 0.000000  | 1.916937  | 0.000000 |
| C  | 1.110628  | 2.733992  | 0.000000 |
| C  | 0.696744  | 4.106978  | 0.000000 |
| C  | -0.696744 | 4.106978  | 0.000000 |
| C  | -1.110628 | 2.733992  | 0.000000 |
| N  | -1.916937 | 0.000000  | 0.000000 |
| C  | -2.733992 | 1.110628  | 0.000000 |
| C  | -4.106978 | 0.696744  | 0.000000 |
| C  | -4.106978 | -0.696744 | 0.000000 |
| C  | -2.733992 | -1.110628 | 0.000000 |
| N  | 0.000000  | -1.916937 | 0.000000 |
| C  | -1.110628 | -2.733992 | 0.000000 |
| C  | -0.696744 | -4.106978 | 0.000000 |
| C  | 0.696744  | -4.106978 | 0.000000 |
| C  | 1.110628  | -2.733992 | 0.000000 |
| N  | 1.916937  | 0.000000  | 0.000000 |
| C  | 2.733992  | -1.110628 | 0.000000 |
| C  | 4.106978  | -0.696744 | 0.000000 |
| C  | 4.106978  | 0.696744  | 0.000000 |
| C  | 2.733992  | 1.110628  | 0.000000 |
| C  | -5.289468 | -1.414528 | 0.000000 |
| C  | -6.471333 | -0.698379 | 0.000000 |
| C  | -6.471333 | 0.698379  | 0.000000 |
| C  | -5.289468 | 1.414528  | 0.000000 |
| C  | -1.414528 | 5.289468  | 0.000000 |
| C  | -0.698379 | 6.471333  | 0.000000 |
| C  | 0.698379  | 6.471333  | 0.000000 |
| C  | 1.414528  | 5.289468  | 0.000000 |
| C  | 5.289468  | 1.414528  | 0.000000 |
| C  | 6.471333  | 0.698379  | 0.000000 |
| C  | 6.471333  | -0.698379 | 0.000000 |
| C  | 5.289468  | -1.414528 | 0.000000 |
| C  | 1.414528  | -5.289468 | 0.000000 |
| C  | 0.698379  | -6.471333 | 0.000000 |
| C  | -0.698379 | -6.471333 | 0.000000 |
| C  | -1.414528 | -5.289468 | 0.000000 |
| H  | -5.273312 | -2.506737 | 0.000000 |
| H  | -7.425400 | -1.230362 | 0.000000 |
| H  | -7.425400 | 1.230362  | 0.000000 |
| H  | -5.273312 | 2.506737  | 0.000000 |
| H  | -2.506737 | 5.273312  | 0.000000 |

|   |           |           |          |
|---|-----------|-----------|----------|
| H | -1.230362 | 7.425400  | 0.000000 |
| H | 1.230362  | 7.425400  | 0.000000 |
| H | 2.506737  | 5.273312  | 0.000000 |
| H | 5.273312  | 2.506737  | 0.000000 |
| H | 7.425400  | 1.230362  | 0.000000 |
| H | 7.425400  | -1.230362 | 0.000000 |
| H | 5.273312  | -2.506737 | 0.000000 |
| H | 2.506737  | -5.273312 | 0.000000 |
| H | 1.230362  | -7.425400 | 0.000000 |
| H | -1.230362 | -7.425400 | 0.000000 |
| H | -2.506737 | -5.273312 | 0.000000 |

**LS min**

|    |           |           |          |
|----|-----------|-----------|----------|
| Mn | 0.000000  | 0.000000  | 0.000000 |
| N  | 2.367787  | 2.357219  | 0.000000 |
| N  | -2.367787 | 2.357219  | 0.000000 |
| N  | -2.367787 | -2.357219 | 0.000000 |
| N  | 2.367787  | -2.357219 | 0.000000 |
| N  | 0.000000  | 1.921394  | 0.000000 |
| C  | 1.110962  | 2.733604  | 0.000000 |
| C  | 0.698588  | 4.100287  | 0.000000 |
| C  | -0.698588 | 4.100287  | 0.000000 |
| C  | -1.110962 | 2.733604  | 0.000000 |
| N  | -1.912189 | 0.000000  | 0.000000 |
| C  | -2.734500 | 1.110339  | 0.000000 |
| C  | -4.113358 | 0.694734  | 0.000000 |
| C  | -4.113358 | -0.694734 | 0.000000 |
| C  | -2.734500 | -1.110339 | 0.000000 |
| N  | 0.000000  | -1.921394 | 0.000000 |
| C  | -1.110962 | -2.733604 | 0.000000 |
| C  | -0.698588 | -4.100287 | 0.000000 |
| C  | 0.698588  | -4.100287 | 0.000000 |
| C  | 1.110962  | -2.733604 | 0.000000 |
| N  | 1.912189  | 0.000000  | 0.000000 |
| C  | 2.734500  | -1.110339 | 0.000000 |
| C  | 4.113358  | -0.694734 | 0.000000 |
| C  | 4.113358  | 0.694734  | 0.000000 |
| C  | 2.734500  | 1.110339  | 0.000000 |
| C  | -5.292593 | -1.412902 | 0.000000 |
| C  | -6.477660 | -0.696684 | 0.000000 |
| C  | -6.477660 | 0.696684  | 0.000000 |
| C  | -5.292593 | 1.412902  | 0.000000 |
| C  | -1.416287 | 5.286315  | 0.000000 |
| C  | -0.700297 | 6.464248  | 0.000000 |
| C  | 0.700297  | 6.464248  | 0.000000 |
| C  | 1.416287  | 5.286315  | 0.000000 |
| C  | 5.292593  | 1.412902  | 0.000000 |
| C  | 6.477660  | 0.696684  | 0.000000 |
| C  | 6.477660  | -0.696684 | 0.000000 |
| C  | 5.292593  | -1.412902 | 0.000000 |
| C  | 1.416287  | -5.286315 | 0.000000 |

|   |           |           |          |
|---|-----------|-----------|----------|
| C | 0.700297  | -6.464248 | 0.000000 |
| C | -0.700297 | -6.464248 | 0.000000 |
| C | -1.416287 | -5.286315 | 0.000000 |
| H | -5.275478 | -2.504883 | 0.000000 |
| H | -7.430866 | -1.229806 | 0.000000 |
| H | -7.430866 | 1.229806  | 0.000000 |
| H | -5.275478 | 2.504883  | 0.000000 |
| H | -2.508237 | 5.270706  | 0.000000 |
| H | -1.230663 | 7.419076  | 0.000000 |
| H | 1.230663  | 7.419076  | 0.000000 |
| H | 2.508237  | 5.270706  | 0.000000 |
| H | 5.275478  | 2.504883  | 0.000000 |
| H | 7.430866  | 1.229806  | 0.000000 |
| H | 7.430866  | -1.229806 | 0.000000 |
| H | 5.275478  | -2.504883 | 0.000000 |
| H | 2.508237  | -5.270706 | 0.000000 |
| H | 1.230663  | -7.419076 | 0.000000 |
| H | -1.230663 | -7.419076 | 0.000000 |
| H | -2.508237 | -5.270706 | 0.000000 |

**LS TS**

|    |           |           |          |
|----|-----------|-----------|----------|
| Mn | 0.000000  | 0.000000  | 0.000000 |
| N  | 0.000000  | 3.345902  | 0.000000 |
| N  | -3.338278 | 0.000000  | 0.000000 |
| N  | 0.000000  | -3.345902 | 0.000000 |
| N  | 3.338278  | 0.000000  | 0.000000 |
| N  | -1.354121 | 1.356543  | 0.000000 |
| C  | -1.146518 | 2.718400  | 0.000000 |
| C  | -2.408593 | 3.398508  | 0.000000 |
| C  | -3.394259 | 2.413799  | 0.000000 |
| C  | -2.718595 | 1.148897  | 0.000000 |
| N  | -1.354121 | -1.356543 | 0.000000 |
| C  | -2.718595 | -1.148897 | 0.000000 |
| C  | -3.394259 | -2.413799 | 0.000000 |
| C  | -2.408593 | -3.398508 | 0.000000 |
| C  | -1.146518 | -2.718400 | 0.000000 |
| N  | 1.354121  | -1.356543 | 0.000000 |
| C  | 1.146518  | -2.718400 | 0.000000 |
| C  | 2.408593  | -3.398508 | 0.000000 |
| C  | 3.394259  | -2.413799 | 0.000000 |
| C  | 2.718595  | -1.148897 | 0.000000 |
| N  | 1.354121  | 1.356543  | 0.000000 |
| C  | 2.718595  | 1.148897  | 0.000000 |
| C  | 3.394259  | 2.413799  | 0.000000 |
| C  | 2.408593  | 3.398508  | 0.000000 |
| C  | 1.146518  | 2.718400  | 0.000000 |
| C  | -2.729511 | -4.743948 | 0.000000 |
| C  | -4.069253 | -5.080432 | 0.000000 |
| C  | -5.058528 | -4.094108 | 0.000000 |
| C  | -4.736199 | -2.750332 | 0.000000 |
| C  | -4.736199 | 2.750332  | 0.000000 |

|   |           |           |          |
|---|-----------|-----------|----------|
| C | -5.058528 | 4.094108  | 0.000000 |
| C | -4.069253 | 5.080432  | 0.000000 |
| C | -2.729511 | 4.743948  | 0.000000 |
| C | 2.729511  | 4.743948  | 0.000000 |
| C | 4.069253  | 5.080432  | 0.000000 |
| C | 5.058528  | 4.094108  | 0.000000 |
| C | 4.736199  | 2.750332  | 0.000000 |
| C | 4.736199  | -2.750332 | 0.000000 |
| C | 5.058528  | -4.094108 | 0.000000 |
| C | 4.069253  | -5.080432 | 0.000000 |
| C | 2.729511  | -4.743948 | 0.000000 |
| H | -1.940631 | -5.499220 | 0.000000 |
| H | -4.364235 | -6.131839 | 0.000000 |
| H | -6.108517 | -4.395485 | 0.000000 |
| H | -5.502249 | -1.972021 | 0.000000 |
| H | -5.502249 | 1.972021  | 0.000000 |
| H | -6.108517 | 4.395485  | 0.000000 |
| H | -4.364235 | 6.131839  | 0.000000 |
| H | -1.940631 | 5.499220  | 0.000000 |
| H | 1.940631  | 5.499220  | 0.000000 |
| H | 4.364235  | 6.131839  | 0.000000 |
| H | 6.108517  | 4.395485  | 0.000000 |
| H | 5.502249  | 1.972021  | 0.000000 |
| H | 5.502249  | -1.972021 | 0.000000 |
| H | 6.108517  | -4.395485 | 0.000000 |
| H | 4.364235  | -6.131839 | 0.000000 |
| H | 1.940631  | -5.499220 | 0.000000 |
